# Supplementary material for: A Practical Genome Scan for Population-Specific Strong Selective Sweeps That Have Reached Fixation
Source: PLoS One. 2007 Mar 14;2(3):e286. doi: 10.1371/journal.pone.0000286 (PMC1805687; doi:10.1371/journal.pone.0000286)
Supplement: Data S1 — Candidate regions of selective sweeps causing fixation (0.37 MB XLS) [file pone.0000286.s005.xls]

## Sheet: Summary
Note
Location of SNPs and Genes are referred to NCBI Build34.
Blocks with rMHH<0.05 and rHH<0.3 are shown in the lists.
Summary table
Test	Defined blocks	Ref1	(A) Ref1 rMHH<0.05	(B) Ref1 rHH<0.3	A∩B	Ref2	(C) Ref2 rMHH<0.05	(D) Ref2 rHH<0.3	C∩D	(A∩B) ∩ (C∩D)
YRI	30237	EAS	843	210	31	CEU	506	290	39	1
			2.78797	0.694513	0.102523		1.67345	0.95909	0.128981	0.00330721	(%)
EAS	53717	YRI	1376	3505	874	CEU	139	350	39	12
			2.56157	6.52494	1.62705		0.258764	0.651563	0.0726027	0.0223393	(%)
CEU	42709	YRI	657	1927	384	EAS	91	69	12	4
			1.53832	4.51193	0.899108		0.21307	0.161558	0.0280971	0.00936571	(%)

## Sheet: YRIvsEAS
Chr	First_pos	Last_pos	First_rs	Last_rs	Length	SNP	rMHH(EAS/YRI)	rHH(EAS/YRI)	rMHH(CEU/YRI)	rHH(CEU/YRI)	Genes
2	115994047	115998770	rs12328314	rs7569687	4724	3	0.0185185	0.181818	0.648148	0.654545	Chr2:115996770..116036239	LOC389023
3	10445828	10455628	rs523180	rs918244	9801	4	0	0.157895	0.385965	0.421053	Chr3:10344692..10724716	ATP2B2
3	99700999	99701715	rs6440028	rs6786317	717	2	0	0.296296	0	0.444444
3	179526723	179526963	rs10936968	rs1550553	241	2	0.0338983	0.186441	0.305085	0.355932
3	195234465	195239761	rs4074131	rs12493688	5297	3	0.0175439	0.22807	0.0526316	0.333333
4	2298464	2299943	rs2071684	rs3118619	1480	3	0.0185185	0.296296	0.0925926	0.333333	Chr4:2234091..2382541	KIAA1643
4	42421090	42427766	rs3811767	rs6826414	6677	5	0.0172414	0.293103	0.241379	0.344828	Chr4:42330177..42574432	ATP8A1
4	82692492	82700338	rs1004348	rs4693234	7847	3	0.0363636	0.272727	0.0909091	0.672727
4	153211294	153243151	rs1355413	rs17360461	31858	11	0.0185185	0.222222	0	0.277778	Chr4:153169628..153259773	PET112L
5	45311269	45312090	rs13180087	rs4866929	822	2	0.037037	0.290909	0.277778	0.472727	Chr5:45307474..45741721	HCN1
5	68235723	68240887	rs6886719	rs4976054	5165	2	0.0363636	0.290909	0.145455	0.236364
5	112693553	112698582	rs492346	rs596654	5030	3	0.0166667	0.216667	0.316667	0.4	Chr5:112437745..112706518	MCC
6	80111989	80112043	rs9294144	rs12195982	55	2	0.0357143	0.285714	0.535714	0.625
6	163692579	163698809	rs1764001	rs1148	6231	3	0	0.196429	0.553571	0.607143
7	55010665	55017231	rs2293347	rs884904	6567	2	0	0.267857	0.660714	0.696429	Chr7:54828474..55016780	EGFR
7	98603341	98613022	rs10243678	rs2269985	9682	3	0	0.259259	0.0185185	0.814815	Chr7:98583726..98603821	ARPC1B	Chr7:98603303..98627025	LOC392756	Chr7:98605005..98617689	PDAP1
7	115979996	115996092	rs10435378	rs42336	16097	7	0.0175439	0.263158	0.140351	0.263158	Chr7:115866962..115990899	MET	Chr7:115941426..115987489	WNT2
8	100750640	100768883	rs11785611	rs10092463	18244	5	0.0350877	0.298246	0.175439	0.333333	Chr8:99982077..100846391	COH1
8	134583889	134592124	rs2978034	rs2922462	8236	9	0.0185185	0.259259	0.296296	0.407407
10	65685345	65695867	rs10822318	rs2394088	10523	5	0.0350877	0.175439	0.245614	0.508772
12	12992305	12996267	rs3782571	rs3759218	3963	4	0.0181818	0.272727	0.0545455	0.454545	Chr12:12984976..12994585	GPRC5D
12	72393701	72397147	rs11179754	rs1009993	3447	2	0	0.236364	0.436364	0.545455
14	97546196	97554817	rs7150383	rs7145095	8622	4	0.0333333	0.15	0.633333	0.633333
15	42535194	42538830	rs2288340	rs10518980	3637	5	0.0181818	0.160714	0.109091	0.267857
17	1636278	1648039	rs7224930	rs6502772	11762	6	0	0.218182	0.327273	0.363636	Chr17:1627874..1672676	PITPN
17	74371964	74387216	rs2071654	rs1047743	15253	5	0.037037	0.259259	0.111111	0.518519	Chr17:74369638..74372983	H3F3B	Chr17:74377804..74419003	KIAA1753
19	8033331	8044054	rs2287936	rs7257948	10724	4	0.0185185	0.218182	0.12963	0.290909	Chr19:8023934..8033547	CCL25	Chr19:8036287..8120730	FBN3
19	16105056	16111595	rs1043346	rs8102236	6540	3	0.0181818	0.272727	0.436364	0.6	Chr19:16083490..16105445	RAB8A	Chr19:16105838..16130381	HSH2
19	44819936	44825278	rs2011727	rs1156816	5343	5	0.037037	0.277778	0.203704	0.407407	Chr19:44820643..44823348	LOC390931
22	38954659	38969801	rs17332320	rs139921	15143	7	0	0.236364	0.0909091	0.236364	Chr22:38816985..38962843	KIAA1093
22	40310086	40316173	rs5758402	rs1811113	6088	3	0.0344828	0.293103	0.241379	0.431034	Chr22:40312982..40321495	NHP2L1

## Sheet: YRIvsCEU
Chr	First_pos	Last_pos	First_rs	Last_rs	Length	SNP	rMHH(EAS/YRI)	rHH(EAS/YRI)	rMHH(CEU/YRI)	rHH(CEU/YRI)	Genes
1	53049147	53062355	rs1799822	rs12133464	13209	6	0.22807	0.491228	0.0175439	0.263158	Chr1:53032019..53049785	CPT2	Chr1:53049689..53056207	FLJ20580
1	156385401	156392319	rs862996	rs13962	6919	5	0	0.724138	0	0.224138	Chr1:156358212..156388594	NECL1	Chr1:156391521..156393080	FY
1	159124165	159137828	rs2490438	rs10918342	13664	8	0.0181818	0.309091	0	0.236364
2	102366254	102368713	rs9284725	rs1024794	2460	3	0.169492	0.305085	0.0169492	0.254237
2	223133692	223136223	rs348982	rs348964	2532	3	0.280702	0.350877	0	0.298246
2	235225014	235225893	rs680841	rs17865694	880	8	0.0740741	0.444444	0.037037	0.277778
3	12626523	12642427	rs4684864	rs13069461	15905	5	0.0185185	0.87037	0.037037	0.277778	Chr3:12600108..12680414	RAF1
3	86080877	86088774	rs4266190	rs13093396	7898	5	0.107143	0.392857	0.0178571	0.285714
4	128457547	128468169	rs7437209	rs13118101	10623	4	0	0.425926	0.037037	0.296296
4	131488392	131491299	rs1507782	rs724262	2908	2	0.345455	0.509091	0	0.272727
4	153211294	153243151	rs1355413	rs17360461	31858	11	0.0185185	0.222222	0	0.277778	Chr4:153169628..153259773	PET112L
6	31874692	31882560	rs9296002	rs2227956	7869	4	0.224138	0.396552	0	0.275862	Chr6:31869454..31879025	LSM2	Chr6:31881684..31887094	HSPA1L
6	33043237	33051274	rs443623	rs763469	8038	3	0.103448	0.310345	0.0344828	0.241379
6	34950947	34951439	rs847852	rs847851	493	2	0.333333	0.438596	0.0175439	0.263158	Chr6:34903896..35106045	ANKS1
6	71209446	71210596	rs2639295	rs2262681	1151	3	0.0178571	0.375	0.0357143	0.267857	Chr6:71131772..71266473	KIAA1411
6	100251766	100255505	rs10485225	rs2894891	3740	5	0.12069	0.258621	0.0344828	0.172414
7	15882258	15888494	rs7777809	rs10950603	6237	3	0.578947	0.614035	0.0350877	0.210526	Chr7:15875657..16205284	LOC402250
7	30744287	30749214	rs6954044	rs2267723	4928	3	0	0.425926	0	0.277778	Chr7:30736534..30775996	GARS	Chr7:30745908..30761415	GHRHR
7	52148965	52152594	rs296292	rs296295	3630	4	0.2	0.345455	0.0363636	0.236364
7	52176436	52181716	rs296311	rs296316	5281	3	0.185185	0.314815	0.0185185	0.222222
7	106280698	106286802	rs2251838	rs12674011	6105	2	0.05	0.233333	0.0166667	0.283333	Chr7:106245709..106362395	PRKAR2B
7	106860871	106870343	rs2712228	rs2395910	9473	3	0.157895	0.263158	0.0350877	0.280702	Chr7:106782022..107096736	NRCAM	Chr7:106861611..106918785	SLC26A4
7	125704058	125708725	rs2299447	rs2283065	4668	3	0.12963	0.327273	0.0185185	0.254545	Chr7:125068153..125896765	GRM8	Chr7:125609562..126437801	GRM8
7	141218710	141222223	rs10952516	rs4418267	3514	2	0.482759	0.534483	0.0172414	0.206897	Chr7:141218826..141251060	LOC93432	Chr7:141222103..141222535	TRBV6-7
8	27518798	27522339	rs871579	rs12542107	3542	3	0.166667	0.277778	0.0185185	0.296296	Chr8:27513489..27556198	SCARA3
8	76615072	76615774	rs2922767	rs1817002	703	4	0.178571	0.357143	0.0357143	0.160714
8	123054139	123069358	rs13280918	rs10505417	15220	4	0.0175439	0.438596	0	0.22807	Chr8:123060297..123060429	MRPS36P3
9	75648538	75649567	rs1443868	rs2440232	1030	2	0.189655	0.362069	0.0172414	0.293103	Chr9:75495667..75720342	GNA14
9	107376260	107392280	rs10979766	rs1470124	16021	5	0.125	0.392857	0.0178571	0.214286	Chr9:107286041..107462859	EPB41L4B	Chr9:107391625..107394826	FLJ21596
9	108000915	108009696	rs2769143	rs2769154	8782	3	0.345455	0.490909	0.0363636	0.236364	Chr9:107922427..108314630	AKAP2	Chr9:107922557..108085589	PALM2
10	111715354	111720685	rs913656	rs10509914	5332	3	0.0357143	0.75	0.0357143	0.285714	Chr10:111717385..111729284	SMNDC1
11	78295659	78303072	rs17137274	rs4944215	7414	5	0.0178571	0.625	0.0178571	0.285714	Chr11:78095411..78354697	ODZ4
13	80880318	80888284	rs9531359	rs12429507	7967	5	0	0.381818	0.0181818	0.254545
14	69951760	69962387	rs4902935	rs11622780	10628	4	0.722222	0.759259	0.037037	0.203704
14	70011540	70021604	rs8013161	rs9323561	10065	8	0.690909	0.709091	0.0181818	0.236364	Chr14:69986083..70196163	SIPA1L1
16	7712120	7712915	rs10521085	rs3785217	796	3	0.303571	0.464286	0.0357143	0.196429	Chr16:6069425..7762298	A2BP1
18	6082174	6087485	rs9965494	rs12457649	5312	3	0	0.649123	0.0175439	0.280702	Chr18:6019386..6404901	FLJ35936
20	62457976	62465464	rs6011613	rs6090245	7489	4	0.127273	0.625	0.0181818	0.285714
22	33832614	33838505	rs5995063	rs28581	5892	5	0.0181818	0.464286	0.0181818	0.25

## Sheet: EASvsYRI
Chr	First_pos	Last_pos	First_rs	Last_rs	Length	SNP	rMHH(YRI/EAS)	rHH(YRI/EAS)	rMHH(CEU/EAS)	rHH(CEU/EAS)	Genes
1	3249696	3255376	rs869697	rs7516641	5681	3	0.0185185	0.296296	0.722222	0.722222
1	6132305	6158719	rs6660500	rs11799654	26415	5	0.037037	0.148148	0.796296	0.796296	Chr1:6033878..6163367	BACH
1	15753753	15757556	rs9442234	rs11801060	3804	3	0	0.271186	0.169492	0.40678	Chr1:15746961..15762792	FLJ36766
1	18042537	18052705	rs370248	rs6694127	10169	4	0.0178571	0.196429	0.642857	0.696429	Chr1:17867321..18138057	MGC15730
1	34781938	34791341	rs4653113	rs4417025	9404	5	0.0181818	0.236364	0.309091	0.345455	Chr1:34758699..34798060	SAPAP3
1	43002868	43010308	rs682227	rs585655	7441	6	0.0344828	0.258621	0.431034	0.534483
1	50016530	50034537	rs3119167	rs11205687	18008	7	0.0333333	0.1	0.966667	0.966667	Chr1:49944555..50036978	ELAVL4
1	51181242	51255066	rs6664609	rs10493153	73825	33	0	0.05	0.2	0.283333	Chr1:51190817..51354913	EPS15
1	51289170	51359509	rs7549556	rs7541084	70340	23	0.0333333	0.1	0.133333	0.25	Chr1:51190817..51354913	EPS15
1	61537379	61545257	rs11805607	rs1151770	7879	4	0.0185185	0.259259	0.648148	0.685185	Chr1:61516636..61561012	BBP
1	61556641	61576484	rs1151773	rs1290441	19844	8	0	0.0740741	0.685185	0.722222	Chr1:61516636..61561012	BBP
1	63715481	63752665	rs597878	rs855819	37185	19	0	0.0545455	0.781818	0.8	Chr1:63609631..64014624	ROR1
1	63757853	63848228	rs855812	rs12078876	90376	35	0	0.0909091	0.763636	0.781818	Chr1:63609631..64014624	ROR1
1	64383751	64386266	rs1436745	rs2164571	2516	3	0.0363636	0.109091	0.854545	0.854545	Chr1:64341515..64528653	KIAA1573
1	67893269	67918088	rs636695	rs269329	24820	12	0.0166667	0.283333	0.65	0.666667
1	68782122	68800648	rs4133314	rs12079859	18527	13	0.0357143	0.0892857	0.660714	0.678571
1	69185356	69202098	rs12404688	rs288925	16743	7	0.0363636	0.214286	0.363636	0.464286
1	69208737	69242893	rs288937	rs11209448	34157	12	0.0363636	0.214286	0.236364	0.321429
1	73836247	73840503	rs1351778	rs10890102	4257	5	0.0350877	0.122807	0.596491	0.596491
1	75120506	75158960	rs1415461	rs681866	38455	23	0.0357143	0.122807	0.375	0.421053	Chr1:75094873..75499364	MGC34032
1	75532472	75576338	rs814876	rs2066183	43867	11	0.0181818	0.218182	0.0545455	0.290909
1	75738438	75755587	rs995972	rs5745430	17150	7	0	0.254545	0.109091	0.309091	Chr1:75685223..75801516	MSH4
1	75792821	75805642	rs11161857	rs946163	12822	8	0.0357143	0.178571	0.107143	0.303571	Chr1:75685223..75801516	MSH4
1	75909100	75912778	rs1251528	rs6676370	3679	6	0.0181818	0.218182	0.381818	0.436364
1	86427995	86435522	rs1321681	rs2231580	7528	4	0.0363636	0.25	0.563636	0.589286	Chr1:86435354..86469030	CLCA4
1	92198941	92292755	rs3131828	rs11586876	93815	37	0	0.12069	0.0517241	0.241379	Chr1:92183848..92236345	GLMN	Chr1:92236406..92325530	FLJ13150
1	97018001	97037034	rs1023244	rs11165781	19034	8	0.0175439	0.192982	0.157895	0.315789	Chr1:97015103..97849502	DPYD
1	97048478	97055962	rs1399289	rs6681958	7485	5	0	0.203704	0.203704	0.407407	Chr1:97015103..97849502	DPYD
1	97494779	97557947	rs2786539	rs1337522	63169	33	0	0.0185185	0.777778	0.796296	Chr1:97015103..97849502	DPYD
1	99091361	99114964	rs302788	rs302774	23604	11	0.0333333	0.166667	0.733333	0.733333
1	103010439	103024546	rs4480381	rs1415362	14108	10	0	0.172414	0.37931	0.413793	Chr1:102805918..103036975	COL11A1
1	103085157	103154255	rs3861744	rs11164740	69099	20	0	0.12963	0.314815	0.37037
1	106282967	106322012	rs11184886	rs2150035	39046	19	0	0.0555556	0.166667	0.277778
1	112654655	112721379	rs11578123	rs6537761	66725	25	0	0.0535714	0.392857	0.446429	Chr1:112661523..112691992	LOC388666
1	113101047	113118107	rs7548879	rs736202	17061	7	0.0357143	0.107143	0.25	0.285714
1	115370650	115472863	rs531096	rs12567746	102214	7	0.0181818	0.236364	0.963636	0.981818	Chr1:115453669..115454434	LOC401958
1	116220194	116223565	rs6428892	rs7519319	3372	4	0	0.172414	0.965517	0.982759
1	116279753	116291542	rs12130872	rs1998447	11790	7	0	0.178571	0.982143	0.982143	Chr1:116262263..116293777	ATP1A1
1	116299168	116342808	rs1885802	rs12067788	43641	20	0	0.111111	0.703704	0.703704	Chr1:116312727..116367855	LOC148766
1	116760742	116778989	rs7542138	rs2806882	18248	8	0.0338983	0.0338983	0.966102	0.966102
1	119810546	119913544	rs835573	rs12130502	102999	32	0	0.254545	0.436364	0.454545	Chr1:119800557..119958657	NOTCH2
1	152035145	152049082	rs1218563	rs1061122	13938	6	0.0175439	0.105263	0.245614	0.403509	Chr1:151896694..152059546	KCNN3
1	153302167	153329853	rs547915	rs12063072	27687	12	0.0175439	0.122807	0.842105	0.842105	Chr1:153301290..153326663	LMNA
1	156637099	156653436	rs11265198	rs6413897	16338	3	0.0333333	0.266667	1	1
1	156801057	156816206	rs2592889	rs984553	15150	8	0.0178571	0.178571	0.785714	0.821429
1	156824143	156837142	rs7529729	rs2592903	13000	6	0.037037	0.259259	0.240741	0.296296
1	157139903	157168384	rs2789417	rs4656861	28482	13	0.0185185	0.0555556	0.407407	0.444444	Chr1:157138076..157140802	SLAMF9	Chr1:157159250..157207367	LOC391124
1	160598715	160610536	rs4657276	rs10737492	11822	9	0	0.259259	0.12963	0.277778
1	167568252	167577165	rs4233350	rs10919394	8914	6	0.0357143	0.178571	0.339286	0.482143
1	170093710	170141262	rs4916283	rs926473	47553	23	0.0185185	0.148148	0	0.351852	Chr1:170094379..170105543	LOC391138
1	173669641	173680021	rs9425450	rs7536647	10381	5	0.037037	0.0740741	0.648148	0.666667	Chr1:173671683..174051348	PLAC3
1	182953461	182975294	rs1321669	rs2220128	21834	9	0	0.237288	0.576271	0.576271	Chr1:182943064..183399071	FIBL-6
1	183115055	183143732	rs1951513	rs1322361	28678	14	0	0.037037	0.648148	0.648148	Chr1:182943064..183399071	FIBL-6
1	198529536	198544378	rs6687886	rs832168	14843	6	0	0.232143	0.592593	0.571429	Chr1:198540837..198587673	PKP1
1	202264727	202272840	rs4509642	rs10900449	8114	6	0.0350877	0.210526	0.684211	0.684211	Chr1:202233775..202268541	RBBP5
1	205235274	205242040	rs606714	rs643930	6767	4	0.0178571	0.175439	0.303571	0.473684
1	221520415	221585538	rs6671751	rs2897048	65124	31	0	0.275862	0.413793	0.5	Chr1:221519226..221538326	HSPC163	Chr1:221549326..221586858	WDR26
1	221593608	221618691	rs6694310	rs12743200	25084	14	0	0.237288	0.423729	0.457627
1	226944817	226973527	rs1029119	rs12070887	28711	14	0	0.103448	0.87931	0.87931
1	227001824	227012268	rs9651173	rs6685413	10445	6	0.0166667	0.2	0.983333	0.983333
1	227107514	227113150	rs11122477	rs7532759	5637	6	0.0166667	0.166667	1	1
1	228242776	228248159	rs6674245	rs11122225	5384	3	0.0169492	0.220339	0.627119	0.661017
1	244083860	244133265	rs10924878	rs2642981	49406	22	0	0.0862069	0.275862	0.327586	Chr1:244055588..244118047	SBZF3
1	244828730	244906036	rs6685883	rs6690724	77307	37	0.0175439	0.105263	0.350877	0.368421	Chr1:244835397..244844403	LOC127614	Chr1:244875514..244876443	LOC284532	Chr1:244888435..244893983	LOC391188	Chr1:244894003..244902566	LOC391189
2	5967460	5971319	rs1109509	rs2563996	3860	3	0.0344828	0.275862	0.551724	0.655172
2	9349701	9374121	rs7606100	rs10519965	24421	12	0	0.0727273	0.363636	0.418182	Chr2:9368633..9567545	DDEF2
2	9568544	9656595	rs4798	rs1048610	88052	47	0	0.0727273	0.203704	0.290909	Chr2:9567552..9585374	ITGB1BP1	Chr2:9585607..9634966	CPSF3	Chr2:9636400..9651594	LOC285148	Chr2:9651152..9717637	ADAM17
2	9667528	9677717	rs2276338	rs13404611	10190	6	0	0.196429	0.196429	0.321429	Chr2:9651152..9717637	ADAM17
2	9681349	9711816	rs4499396	rs6712857	30468	15	0.0357143	0.178571	0.0892857	0.25	Chr2:9651152..9717637	ADAM17
2	9715614	9721513	rs6432017	rs13426930	5900	5	0	0.232143	0.0357143	0.214286	Chr2:9651152..9717637	ADAM17
2	12475003	12520179	rs4313945	rs2380433	45177	21	0	0.0185185	0.518519	0.574074
2	13571269	13622168	rs312004	rs7575529	50900	22	0	0.0333333	0.833333	0.85
2	17515081	17521794	rs6753715	rs17379664	6714	4	0.0357143	0.232143	0.0892857	0.303571
2	20995258	21030256	rs645150	rs4971531	34999	19	0.0169492	0.0677966	0.898305	0.898305	Chr2:20869330..21007339	FLJ21820
2	22298089	22450516	rs396757	rs10196529	152428	51	0	0	0.0357143	0.125
2	26787761	26798781	rs7586119	rs1276123	11021	8	0.0338983	0.220339	0.728814	0.745763	Chr2:26778608..26838746	LOC130106
2	28419973	28459979	rs4665406	rs4666048	40007	20	0.0338983	0.0847458	0.0847458	0.254237	Chr2:28088017..28536303	BRE
2	33138185	33148000	rs12618959	rs7594155	9816	5	0	0.214286	0.0892857	0.267857
2	34040539	34046475	rs1533844	rs2457710	5937	4	0	0.169492	0.728814	0.745763
2	39667295	39686536	rs1880705	rs2287090	19242	6	0.0338983	0.169492	1.01695	1.01695
2	43433020	43454632	rs2288621	rs11887748	21613	11	0.0344828	0.137931	0.603448	0.62069	Chr2:43432526..43797712	THADA
2	46368349	46378371	rs11125055	rs281472	10023	4	0.0185185	0.277778	0.277778	0.351852	Chr2:45853759..46386569	PRKCE
2	61153694	61166896	rs10176601	rs13412097	13203	6	0	0.196429	0.267857	0.321429	Chr2:61143638..61219742	FLJ32312
2	61172324	61200648	rs10191951	rs10211029	28325	12	0	0.181818	0.218182	0.236364	Chr2:61143638..61219742	FLJ32312
2	61866943	61894943	rs11694538	rs6737813	28001	12	0.0181818	0.181818	0.4	0.436364
2	72363872	72475675	rs975612	rs2192015	111804	59	0	0.0740741	0.296296	0.333333	Chr2:72375776..73066555	SEC15L2
2	72477911	72678271	rs4852287	rs684673	200361	91	0	0.178571	0.410714	0.410714	Chr2:72375776..73066555	SEC15L2
2	72682412	72959670	rs653220	rs7580268	277259	104	0	0.101695	0.288136	0.338983	Chr2:72375776..73066555	SEC15L2
2	73075956	73103219	rs10865394	rs7608304	27264	13	0	0.222222	0.407407	0.444444	Chr2:73089084..73093824	SPR
2	73144147	73169348	rs17008501	rs6728989	25202	7	0	0.0545455	0.945455	0.945455	Chr2:73143704..73273503	SFXN5
2	73692105	73702571	rs2056486	rs11893492	10467	6	0	0.293103	0.672414	0.724138	Chr2:73587424..73811584	ALMS1
2	73726906	73736419	rs10469966	rs3738848	9514	4	0	0.275862	0.637931	0.672414	Chr2:73587424..73811584	ALMS1
2	82459740	82472345	rs7585343	rs6547415	12606	8	0.0166667	0.15	0.816667	0.816667
2	82489384	82544081	rs6547418	rs10520342	54698	28	0.0175439	0.157895	0.45614	0.491228
2	86449983	86455362	rs6547667	rs17027101	5380	3	0.0363636	0.254545	0.963636	0.963636	Chr2:86415662..86539317	FLJ13110
2	100355315	100366324	rs7583182	rs1437377	11010	5	0.037037	0.12963	0.555556	0.592593	Chr2:100342776..100358897	LOC400990
2	103671582	103678764	rs9308865	rs1368546	7183	3	0.0172414	0.258621	0.362069	0.637931
2	103784587	103853252	rs6721892	rs7583069	68666	25	0	0.185185	0.148148	0.537037
2	103861820	103897902	rs11888473	rs171939	36083	12	0	0.203704	0.240741	0.518519
2	109010246	109069066	rs700876	rs7585888	58821	22	0.0185185	0.181818	0.666667	0.690909	Chr2:108957337..109022651	RANBP2	Chr2:109024619..109114247	FLJ32745
2	109171492	109207713	rs6761501	rs260694	36222	20	0.037037	0.037037	0	0.5	Chr2:109132329..109227228	EDAR
2	113494506	113497676	rs4849087	rs1061254	3171	4	0	0.266667	0.7	0.8	Chr2:113494555..113499501	LOC400999
2	115673656	115678353	rs2102901	rs1474170	4698	3	0.0172414	0.241379	0.568966	0.568966
2	118055569	118076374	rs333859	rs11896437	20806	13	0.0350877	0.22807	0.842105	0.842105
2	119054937	119094864	rs12711897	rs1107360	39928	20	0.0333333	0.116667	0.7	0.716667
2	121766837	121827180	rs7559164	rs280200	60344	34	0.0350877	0.105263	1	1	Chr2:121645004..121844101	GLI2
2	123359891	123383084	rs1527239	rs11122912	23194	16	0.0333333	0.1	0.933333	0.933333
2	129339887	129350905	rs10496669	rs705058	11019	5	0.0181818	0.272727	0.654545	0.727273
2	130567426	130596097	rs3958637	rs4343422	28672	15	0	0.116667	0.883333	0.883333
2	149817098	150002655	rs2890933	rs9711441	185558	32	0.0363636	0.0909091	0.745455	0.781818	Chr2:149831764..149832139	UBBP3	Chr2:149838362..149841135	LOC344172	Chr2:149843956..149891468	LOC391451	Chr2:149996157..150070735	KIF5C
2	167384737	167392463	rs6726575	rs7606196	7727	3	0.0357143	0.25	0.696429	0.75
2	171655309	171661542	rs4667647	rs1011470	6234	5	0.037037	0.12963	0.62963	0.685185	Chr2:171237199..171713535	MYO3B
2	171985408	172002259	rs3755125	rs10803854	16852	9	0.0185185	0.277778	0.444444	0.5	Chr2:171988255..172026184	GORASP2
2	172101731	172133362	rs6732108	rs16823191	31632	10	0.037037	0.203704	0.37037	0.425926	Chr2:172051112..172219770	TLK1
2	172152249	172171491	rs1529378	rs6730417	19243	6	0.037037	0.240741	0.407407	0.462963	Chr2:172051112..172219770	TLK1
2	172216273	172217924	rs10177560	rs9646785	1652	3	0.037037	0.296296	0.425926	0.481481	Chr2:172051112..172219770	TLK1
2	175240567	175248862	rs9646789	rs1703	8296	3	0.0363636	0.2	0.127273	0.490909	Chr2:175139721..175314090	PTD004
2	177655823	177682598	rs1448521	rs2922309	26776	12	0.0175439	0.140351	0.210526	0.298246
2	177838807	177847126	rs1913371	rs1554012	8320	5	0.0185185	0.12963	0.0740741	0.203704
2	177861303	177895116	rs1251035	rs840706	33814	18	0.0185185	0.0555556	0.166667	0.296296	Chr2:177871568..177873595	FUCA1P
2	177906815	178002851	rs16864564	rs4894220	96037	57	0	0.0535714	0.0535714	0.142857
2	178007581	178042180	rs1370540	rs1113669	34600	18	0	0.0517241	0.0862069	0.172414
2	178086499	178090778	rs1881699	rs1997350	4280	3	0	0.166667	0.296296	0.518519
2	178356379	178369430	rs2167904	rs1901828	13052	8	0.037037	0.259259	0.666667	0.740741	Chr2:178350780..178459959	DKFZp451M2119
2	178401989	178416186	rs4893930	rs2886194	14198	8	0	0.181818	0.581818	0.636364	Chr2:178350780..178459959	DKFZp451M2119
2	178777870	178784463	rs6756994	rs1438035	6594	4	0.0344828	0.224138	0.672414	0.672414	Chr2:178695355..179140026	PDE11A
2	183996476	184024917	rs6742298	rs17265866	28442	16	0.0357143	0.214286	0.607143	0.642857	Chr2:183992158..184105641	NCKAP1
2	184075699	184109329	rs11899644	rs1022337	33631	16	0	0.2	0.581818	0.618182	Chr2:183992158..184105641	NCKAP1
2	184121850	184126315	rs2675079	rs4666882	4466	5	0.0178571	0.25	0.642857	0.678571
2	186082845	186104709	rs263763	rs13425251	21865	12	0.037037	0.240741	0.759259	0.759259
2	192966310	192993708	rs6755466	rs10173037	27399	11	0	0.0526316	0.789474	0.789474
2	195535928	195551135	rs7584952	rs4328652	15208	5	0.037037	0.290909	0.722222	0.727273
2	197620972	197701979	rs11888703	rs1113281	81008	39	0	0.0740741	0.555556	0.592593	Chr2:197266520..197659878	NEDL2
2	198163738	198208931	rs6727855	rs2950817	45194	24	0.0185185	0.185185	0.296296	0.333333	Chr2:198061793..198265305	LOC91526
2	198214447	198238211	rs2249470	rs4013863	23765	14	0.0181818	0.109091	0.690909	0.709091	Chr2:198061793..198265305	LOC91526
2	199299697	199310901	rs1531180	rs1456563	11205	8	0	0.0892857	0.160714	0.285714
2	199314461	199322528	rs7589892	rs1456560	8068	5	0.0333333	0.15	0.766667	0.766667
2	199469994	199485899	rs2467037	rs2727777	15906	9	0.0181818	0.127273	0.618182	0.654545
2	199639655	199668989	rs13425145	rs13421755	29335	13	0	0.111111	0.555556	0.648148
2	200539032	200589358	rs6730720	rs17443471	50327	15	0.0172414	0.0689655	0.482759	0.534483	Chr2:200537162..200544201	FLJ32063
2	200602618	200625117	rs11902577	rs11890804	22500	9	0.0166667	0.1	0.633333	0.666667
2	201930316	201939277	rs12478395	rs7606251	8962	4	0.0338983	0.186441	0.576271	0.627119	Chr2:201920348..201971903	CLK1	Chr2:201938222..201956542	PPIL3
2	201944888	201950958	rs2136600	rs6747253	6071	3	0.0338983	0.237288	0.627119	0.694915	Chr2:201920348..201971903	CLK1	Chr2:201938222..201956542	PPIL3
2	201962519	202012247	rs13399698	rs10205561	49729	19	0.0175439	0.0877193	0.508772	0.578947	Chr2:201920348..201971903	CLK1	Chr2:201956731..201994805	NIF3L1	Chr2:201977437..202030953	ORC2L
2	202017889	202047946	rs16836168	rs3731716	30058	11	0.0350877	0.280702	0.631579	0.701754	Chr2:201977437..202030953	ORC2L	Chr2:202046330..202138935	MGC39518
2	202056000	202113707	rs16836477	rs13384791	57708	15	0	0.220339	0.610169	0.677966	Chr2:202046330..202138935	MGC39518
2	202168221	202194950	rs2110728	rs6728771	26730	6	0.0169492	0.254237	0.542373	0.610169	Chr2:202183433..202231558	CFLAR
2	202582105	202607713	rs13383912	rs1112961	25609	16	0.037037	0.222222	0.296296	0.351852	Chr2:202554691..202686441	FLJ25351
2	206015701	206019237	rs6718456	rs6720699	3537	4	0.0185185	0.166667	0.444444	0.5	Chr2:205613266..206683080	ALS2CR19
2	206463572	206497552	rs849230	rs849244	33981	18	0.0185185	0.0363636	0.703704	0.690909	Chr2:205613266..206683080	ALS2CR19
2	206504626	206546409	rs10175496	rs7573626	41784	18	0.0178571	0.0892857	0.535714	0.589286	Chr2:205613266..206683080	ALS2CR19
2	206946341	206972590	rs1861619	rs6435316	26250	12	0	0.0517241	0.586207	0.603448
2	209251282	209268410	rs7583625	rs10445733	17129	13	0.0175439	0.0877193	0.578947	0.596491	Chr2:209232614..209257339	LOC389073
2	213154339	213164534	rs2888038	rs7564926	10196	7	0	0.166667	0.666667	0.683333	Chr2:212449357..213605829	ERBB4
2	216171471	216183260	rs2948974	rs10206315	11790	7	0	0.157895	0.596491	0.614035	Chr2:215998808..216205693	ABCA12
2	216460793	216483904	rs1968510	rs9288508	23112	16	0	0.0185185	0.0740741	0.222222	Chr2:216428128..216503335	FN1
2	217703600	217721793	rs9341106	rs9341183	18194	12	0.0175439	0.0526316	0.614035	0.631579	Chr2:217700669..217731698	IGFBP2
2	218740097	218761049	rs10190472	rs9653349	20953	10	0.0350877	0.157895	0.736842	0.736842
2	219893930	219900543	rs1000936	rs6731254	6614	5	0	0.183333	1	1	Chr2:219889646..219899053	PRKAG3
2	225887612	225971798	rs6436513	rs11901561	84187	33	0.0185185	0.0925926	0.148148	0.333333	Chr2:225832977..226049624	DOCK10
2	232781704	232787864	rs838438	rs11904625	6161	4	0.0181818	0.0909091	0.618182	0.654545
2	237442349	237467166	rs1377451	rs7586512	24818	12	0.0357143	0.178571	0.607143	0.678571
2	237773517	237794567	rs2004992	rs6745492	21051	11	0	0.12963	0.537037	0.537037	Chr2:237765193..237777741	CMKOR1
2	237932768	237947532	rs6725978	rs13419340	14765	9	0.0350877	0.0526316	0.77193	0.77193
2	237952831	237957670	rs7585918	rs1007370	4840	3	0.0175439	0.140351	0.929825	0.929825
2	238282731	238333665	rs6727123	rs6724665	50935	29	0.0363636	0.109091	0.763636	0.8	Chr2:238280834..238294239	COPS8
2	238362301	238398614	rs10803655	rs10199274	36314	20	0.0181818	0.0363636	0.527273	0.563636
3	404177	439302	rs7639991	rs6442861	35126	17	0.0166667	0.05	0.833333	0.833333	Chr3:213650..426098	CHL1
3	563448	645236	rs6778854	rs1586221	81789	12	0	0.133333	0.766667	0.766667	Chr3:634562..655933	LOC402123
3	1106724	1137041	rs6797386	rs2872338	30318	13	0	0.0508475	0.79661	0.79661	Chr3:1109629..1420278	CNTN6
3	8709333	8720493	rs171305	rs164459	11161	4	0.0185185	0.296296	0.37037	0.5
3	9351019	9360213	rs11131166	rs2728940	9195	4	0.037037	0.296296	0.407407	0.518519
3	17401719	17477922	rs2028874	rs7644389	76204	23	0.037037	0.240741	0.203704	0.462963	Chr3:17174903..17757403	TBC1D5
3	17481028	17625749	rs7432241	rs9821955	144722	33	0.0185185	0.0740741	0.12963	0.277778	Chr3:17174903..17757403	TBC1D5
3	17636936	17656329	rs9310528	rs11927967	19394	7	0.0185185	0.296296	0.12963	0.314815	Chr3:17174903..17757403	TBC1D5
3	17741701	17835505	rs6577643	rs1430896	93805	25	0.037037	0.277778	0.12963	0.259259	Chr3:17174903..17757403	TBC1D5
3	25740708	25791286	rs1873099	rs12630981	50579	20	0	0.0925926	0.685185	0.703704	Chr3:25735740..25799887	NGLY1	Chr3:25771358..25773273	LOC246135
3	25798505	25805669	rs1488994	rs9824020	7165	4	0	0.240741	0.814815	0.833333	Chr3:25735740..25799887	NGLY1	Chr3:25797449..25799854	FLJ12409
3	25823885	25905169	rs11915917	rs9310784	81285	26	0	0.0185185	0.407407	0.407407	Chr3:25874988..25890153	LOC285326
3	31284527	31299719	rs6803159	rs9310965	15193	6	0.0185185	0.277778	0.740741	0.740741	Chr3:31278216..31468151	LOC391524
3	34295239	34380189	rs1518881	rs9816209	84951	21	0.0344828	0.137931	0.37931	0.448276	Chr3:34172594..34576137	LOC285307
3	37913219	37948030	rs6792008	rs9835844	34812	16	0.037037	0.203704	0.592593	0.592593	Chr3:37863750..37986584	CTDSPL
3	53951001	53975166	rs7620688	rs4687765	24166	9	0.037037	0.0925926	0.425926	0.592593
3	59804087	59840140	rs677703	rs294464	36054	17	0	0.0833333	0.633333	0.633333
3	60774243	60801600	rs2736750	rs2594130	27358	15	0.0166667	0.0666667	0.55	0.583333
3	62737977	62741117	rs304170	rs962818	3141	4	0.0357143	0.142857	0.678571	0.678571	Chr3:62341359..62818392	CADPS
3	65031244	65035056	rs1482594	rs1384412	3813	4	0.0350877	0.192982	0.684211	0.719298
3	65398337	65427819	rs7648306	rs13082932	29483	8	0	0.166667	0.444444	0.537037	Chr3:65303384..65565101	BAIAP1
3	65664751	65683298	rs10510942	rs1979820	18548	9	0.0166667	0.133333	0.2	0.233333
3	70726151	70773998	rs11928335	rs10511013	47848	12	0.0357143	0.196429	0.25	0.339286
3	71353721	71358877	rs831082	rs1288524	5157	4	0	0.12069	0.172414	0.362069	Chr3:70926769..71513085	FOXP1
3	71532106	71559593	rs6785868	rs11929486	27488	12	0.0175439	0.0877193	0.175439	0.508772	Chr3:71549139..71568184	LOC401073
3	72830173	72873276	rs9861834	rs11128299	43104	20	0.0181818	0.0909091	0.490909	0.527273	Chr3:72846742..72848197	LOC317753	Chr3:72858286..72945524	LOC389129
3	72876432	72892040	rs11916444	rs6762810	15609	8	0.0338983	0.169492	0.79661	0.79661	Chr3:72858286..72945524	LOC389129
3	78452281	78465577	rs4324439	rs4449272	13297	6	0.0363636	0.127273	0.709091	0.745455
3	78513138	78525892	rs6786442	rs1507422	12755	5	0.0178571	0.0714286	0.910714	0.910714
3	79133787	79175672	rs7611697	rs6782878	41886	11	0.0166667	0.25	0.9	0.9	Chr3:78567291..79559962	ROBO1
3	79196489	79232065	rs324755	rs11918447	35577	8	0.0166667	0.233333	0.85	0.85	Chr3:78567291..79559962	ROBO1
3	82709181	82754265	rs6548847	rs2029920	45085	17	0.0178571	0.125	0.446429	0.535714
3	95937194	95951467	rs9851690	rs449465	14274	5	0.0185185	0.296296	0.87037	0.888889
3	98431177	98500835	rs6439152	rs9826983	69659	28	0.0178571	0.0714286	1.03571	1.03571	Chr3:98479391..98688322	DKFZp434C1418
3	103426632	103506480	rs9860680	rs6765041	79849	34	0.0350877	0.122807	0.22807	0.298246	Chr3:103474760..103519586	LOC131368
3	110046102	110107582	rs6437812	rs3804671	61481	21	0	0.140351	0.22807	0.298246	Chr3:109997992..110157869	MORC
3	110137229	110195542	rs4241398	rs884196	58314	26	0	0.142857	0.0714286	0.142857	Chr3:109997992..110157869	MORC	Chr3:110158185..110189857	LOC401081
3	111012269	111017503	rs637204	rs709581	5235	2	0.0166667	0.283333	0.316667	0.383333
3	112499601	112514689	rs2698351	rs9873685	15089	6	0.0357143	0.160714	0.482143	0.571429
3	115832257	115884049	rs12490319	rs13316558	51793	27	0	0.0909091	0.509091	0.527273	Chr3:115874027..115971200	LOC344811
3	124750083	124773739	rs820338	rs4678047	23657	10	0.0350877	0.140351	0.385965	0.54386	Chr3:124653777..124871412	MYLK
3	124818557	124843347	rs1869863	rs876168	24791	10	0.0363636	0.163636	0.927273	0.927273	Chr3:124653777..124871412	MYLK
3	134543192	134556975	rs10935066	rs9820205	13784	3	0.037037	0.296296	0.185185	0.222222
3	136031565	136057580	rs36094	rs36057	26016	10	0	0.272727	0.145455	0.2	Chr3:135835169..136299564	EPHB1
3	136930460	136989625	rs13075467	rs1403767	59166	21	0.0178571	0.0535714	0.375	0.428571	Chr3:136941813..136965925	LOC391580
3	139667738	139700978	rs361074	rs559160	33241	12	0	0.0877193	0.280702	0.368421	Chr3:139648828..139673120	FAIM	Chr3:139683060..139684474	LOC256374	Chr3:139695140..139799094	PIK3CB
3	139709484	139915553	rs361094	rs6776833	206070	70	0.0178571	0.0535714	0.178571	0.267857	Chr3:139695140..139799094	PIK3CB
3	168858577	168873461	rs6797197	rs11914302	14885	7	0.037037	0.259259	0.407407	0.425926	Chr3:168774462..168864269	SERPINI1
3	173031724	173047823	rs11922292	rs476651	16100	4	0.0185185	0.166667	0.388889	0.462963
3	174209886	174248613	rs7611388	rs705045	38728	13	0.0363636	0.127273	0.709091	0.709091
3	178756365	178779015	rs7622934	rs4857728	22651	13	0.0185185	0.0925926	0.296296	0.314815	Chr3:178480622..178790795	LOC401101
3	181100502	181110499	rs7611246	rs7609615	9998	7	0.037037	0.111111	0.0555556	0.351852
3	181421233	181444897	rs1520616	rs11917884	23665	12	0.0166667	0.116667	0.6	0.6
3	181456281	181479390	rs10513772	rs13315930	23110	10	0.0166667	0.1	0.583333	0.583333
3	181495380	181536064	rs9290705	rs4615077	40685	17	0.0166667	0.1	0.583333	0.6
3	181545024	181569638	rs9882377	rs1603658	24615	13	0	0.116667	0.566667	0.583333
3	181574649	181621749	rs9877903	rs6443701	47101	22	0.0338983	0.118644	0.288136	0.355932
3	181628541	181649662	rs6443702	rs3810763	21122	4	0.0172414	0.258621	0.689655	0.706897	Chr3:181640873..181649672	TTC14
3	181672294	181694425	rs9864971	rs7622189	22132	9	0.0166667	0.166667	0.533333	0.55	Chr3:181658504..181747526	DKFZp434A128
3	182729134	182736858	rs13323240	rs6809817	7725	5	0.0333333	0.2	0.616667	0.616667
3	183490119	183513375	rs9851315	rs6790643	23257	8	0.0357143	0.214286	1.05357	1.05357	Chr3:183485671..183529140	LOC401103
3	189942954	189965590	rs1355559	rs1912873	22637	10	0	0.0357143	0.482143	0.5
4	1091046	1095510	rs1383660	rs6840347	4465	3	0.0333333	0.266667	0.833333	0.833333	Chr4:1055099..1097180	LOC285498
4	1806659	1825786	rs6599401	rs4362888	19128	4	0	0.181818	0.818182	0.818182	Chr4:1776399..1819613	LETM1
4	3622694	3655752	rs6446743	rs1853075	33059	7	0.0166667	0.166667	0.533333	0.55	Chr4:3609973..3624089	FLJ35424
4	6098199	6127181	rs765831	rs6821383	28983	15	0	0.0166667	0.3	0.383333	Chr4:6120028..6266824	MARLIN1
4	6145359	6151294	rs6446452	rs10516179	5936	4	0.0181818	0.127273	0.672727	0.672727	Chr4:6120028..6266824	MARLIN1
4	6430461	6437000	rs6446493	rs4440300	6540	4	0.0166667	0.166667	0.75	0.75	Chr4:6386847..6538552	PPP2R2C
4	11697856	11702838	rs7696261	rs7681362	4983	6	0.0350877	0.245614	0.754386	0.789474
4	12187195	12194946	rs4569774	rs6448893	7752	7	0.0175439	0.280702	1.01754	1.01754
4	13312811	13339945	rs4698723	rs10939491	27135	14	0	0.0892857	0.464286	0.5	Chr4:13298583..13318885	LOC285548
4	13400968	13433297	rs1352786	rs1491265	32330	18	0	0.175439	0.45614	0.473684	Chr4:13384321..13401028	LOC402172
4	13434626	13457741	rs7680353	rs11727013	23116	12	0	0.0357143	0.375	0.410714
4	14352541	14358374	rs11944546	rs4414948	5834	6	0.0333333	0.25	0.766667	0.766667
4	26285842	26322892	rs6838762	rs6838102	37051	21	0.0363636	0.107143	1.09091	1.07143
4	28908231	28926067	rs1567179	rs1588108	17837	10	0.0175439	0.192982	0.561404	0.649123
4	36792161	36814135	rs6531489	rs6531493	21975	11	0	0.275862	0.0344828	0.275862
4	41741878	41793662	rs714226	rs11945879	51785	21	0	0.0740741	0.611111	0.62963	Chr4:41783843..41785671	LOC401129
4	41798143	42015607	rs4861148	rs7683102	217465	104	0	0.111111	0.388889	0.388889	Chr4:41852711..41873365	FLJ10525	Chr4:41899315..41904026	LOC285429	Chr4:41908091..42005080	SLC30A9	Chr4:41946768..41948818	ATP1BL1
4	42022581	42068092	rs6840190	rs4861024	45512	25	0	0.0740741	0.481481	0.5	Chr4:42035436..42070539	LOC389206
4	47832664	47858978	rs4695309	rs2053406	26315	14	0.0338983	0.152542	0.627119	0.661017	Chr4:47853573..47898973	CNGA1
4	52994788	53039066	rs11133416	rs900209	44279	23	0	0.1	0.983333	0.983333
4	69053023	69155215	rs11940802	rs11940780	102193	39	0.0333333	0.133333	0.416667	0.433333	Chr4:69057622..69087178	LOC401136	Chr4:69095751..69114789	DKFZp686L1818
4	71959722	71972371	rs2553324	rs2609426	12650	8	0.0338983	0.20339	0.949153	0.949153	Chr4:71960712..71978787	ENAM
4	71975682	71987363	rs3796704	rs2288243	11682	6	0.0344828	0.258621	0.965517	0.965517	Chr4:71960712..71978787	ENAM
4	75307636	75323909	rs1594230	rs409336	16274	10	0.0181818	0.145455	0.745455	0.763636	Chr4:75313047..75313928	PF4	Chr4:75319020..75320135	PPBP
4	77242137	77267714	rs7681054	rs7691712	25578	14	0	0.0178571	0.267857	0.517857	Chr4:77239420..77282076	PPEF2
4	77271068	77282473	rs13116688	rs9784511	11406	5	0.0178571	0.107143	0.232143	0.446429	Chr4:77239420..77282076	PPEF2
4	80351206	80376967	rs1480713	rs13147110	25762	11	0.0357143	0.142857	0.714286	0.75
4	80431994	80478700	rs286457	rs1902183	46707	20	0.0166667	0.0833333	0.583333	0.616667
4	80489206	80512268	rs7663861	rs6840465	23063	9	0.0166667	0.1	0.733333	0.766667
4	81330308	81343578	rs4402984	rs7687679	13271	5	0	0.290909	0.418182	0.527273	Chr4:81285120..81451169	ANTXR2
4	81354186	81377573	rs4292279	rs7692932	23388	5	0.0185185	0.277778	0.425926	0.537037	Chr4:81285120..81451169	ANTXR2
4	82792582	82802782	rs10015345	rs1986163	10201	7	0	0.125	0.535714	0.571429
4	84532348	84574622	rs2868754	rs4541492	42275	16	0	0.0925926	0.592593	0.611111
4	86484363	86494911	rs4693111	rs10516740	10549	5	0	0.25	0.933333	0.933333
4	105430877	105439551	rs2134026	rs2036371	8675	6	0.0166667	0.216667	0.633333	0.65
4	106085701	106097168	rs7685398	rs2158190	11468	6	0.0172414	0.155172	0.637931	0.637931
4	106132387	106150081	rs17034945	rs1018926	17695	8	0.0344828	0.103448	0.689655	0.724138
4	106166873	106180902	rs2522524	rs2866760	14030	5	0	0.277778	0.796296	0.796296
4	110245185	110321979	rs7654940	rs7677050	76795	30	0	0.148148	0.259259	0.351852	Chr4:110193792..110682619	COL25A1
4	118698121	118713276	rs4833543	rs17861758	15156	26	0.0344828	0.0862069	0.344828	0.37931
4	122496846	122527997	rs11945951	rs10021787	31152	14	0.037037	0.12963	0.518519	0.592593	Chr4:122511388..122544297	TNIP3
4	123640724	123686934	rs6813193	rs11734090	46211	14	0.0178571	0.232143	0.357143	0.428571	Chr4:123528514..123742726	KIAA1109
4	124474009	124487208	rs412925	rs307061	13200	9	0	0.25	0.607143	0.660714	Chr4:124303050..124694630	SPATA5
4	135791182	135876957	rs12510007	rs6851707	85776	37	0.0169492	0.118644	0.118644	0.305085
4	135879020	135977901	rs13129759	rs7666232	98882	38	0.0181818	0.0909091	0.127273	0.163636
4	144970090	144984673	rs1877113	rs10008867	14584	5	0	0.222222	0.425926	0.444444
4	152132535	152163677	rs6839548	rs4289432	31143	13	0.0357143	0.178571	0.785714	0.803571	Chr4:151763438..152514276	LRBA
4	152396714	152407451	rs25462	rs1201208	10738	5	0.0363636	0.127273	1.01818	1.01818	Chr4:151763438..152514276	LRBA
4	152418379	152422557	rs1201202	rs1212118	4179	5	0.037037	0.148148	1.01852	1.01852	Chr4:151763438..152514276	LRBA
4	159319086	159320209	rs11100136	rs7677854	1124	2	0.0338983	0.186441	0.271186	0.355932
4	159911018	160011114	rs7687105	rs1350026	100097	34	0.0185185	0.12963	0.555556	0.648148
4	160025884	160092093	rs936095	rs11938976	66210	32	0	0.0172414	0.517241	0.586207	Chr4:160020756..160150834	LGR7
4	160096515	160156318	rs7674953	rs6857298	59804	23	0.0172414	0.0344828	0.741379	0.827586	Chr4:160020756..160150834	LGR7	Chr4:160145598..160207446	ETFDH
4	170593122	170647135	rs7685334	rs963114	54014	24	0	0.145455	0.345455	0.381818	Chr4:170604631..170627285	FLJ14431
4	171417618	171464022	rs11132817	rs6857210	46405	21	0.0363636	0.0909091	0.345455	0.436364	Chr4:171440699..171450404	LOC402192
4	177067227	177109936	rs6553877	rs10034927	42710	14	0	0.166667	0.925926	0.925926
4	178392219	178433913	rs2333521	rs7690947	41695	22	0	0.0877193	0.77193	0.77193	Chr4:178300581..178409785	VEGFC
4	178538540	178567778	rs2728167	rs10520361	29239	16	0	0.166667	0.888889	0.888889
4	185805884	185815734	rs6552767	rs1921565	9851	6	0.0185185	0.037037	0.296296	0.37037	Chr4:185705749..185834909	ENPP6
5	4530546	4568589	rs6862041	rs921389	38044	15	0.0181818	0.0909091	0.618182	0.654545
5	4935860	4949745	rs658465	rs10512753	13886	5	0.0333333	0.1	0.816667	0.816667
5	6542779	6557776	rs2276999	rs6890496	14998	7	0	0.245614	0.877193	0.877193	Chr5:6490198..6547760	LOC134111
5	21956502	21978616	rs2216674	rs7447008	22115	6	0.0185185	0.240741	0.796296	0.814815	Chr5:21796655..22899232	CDH12
5	29215962	29232050	rs1531574	rs1382557	16089	9	0.0350877	0.263158	0.350877	0.45614
5	37213992	37249786	rs16903526	rs10062236	35795	14	0.0363636	0.2	0.927273	0.945455	Chr5:37151831..37259356	FLJ13231
5	38480806	38492265	rs2561818	rs11737983	11460	8	0.0185185	0.166667	0.611111	0.62963	Chr5:38304034..38511082	FLJ39155
5	38498395	38517370	rs7715172	rs11741854	18976	8	0.0181818	0.196429	0.727273	0.732143	Chr5:38304034..38511082	FLJ39155
5	62540147	62552835	rs7704375	rs2126486	12689	7	0.0350877	0.175439	0.245614	0.315789
5	66599737	66677578	rs7713445	rs7725744	77842	33	0	0.0175439	0.421053	0.438596
5	72720504	72725159	rs2973923	rs7448030	4656	4	0.037037	0.259259	0.777778	0.777778
5	75284957	75300076	rs1525763	rs10515204	15120	8	0.0344828	0.224138	0.810345	0.827586	Chr5:75228085..75291769	LOC134356
5	81693639	81721694	rs224824	rs1354123	28056	12	0	0.148148	0.351852	0.388889	Chr5:81659354..81698298	LOC92270
5	86415134	86447264	rs10041152	rs2624207	32131	12	0.0181818	0.254545	0.654545	0.690909	Chr5:86335218..86619101	FLJ11292
5	87243076	87248872	rs710355	rs710354	5797	5	0.0338983	0.271186	0.661017	0.661017
5	87295676	87385330	rs7713357	rs10942516	89655	37	0.0185185	0.203704	0.666667	0.666667
5	87402261	87468514	rs7719905	rs4916714	66254	30	0.0178571	0.25	0.571429	0.571429
5	87912532	87920380	rs16903228	rs17421410	7849	4	0.0350877	0.298246	0.473684	0.561404
5	88308492	88321874	rs301714	rs301728	13383	10	0	0.267857	0.928571	0.928571
5	89642581	89671324	rs11955322	rs1560919	28744	13	0	0.0689655	0.655172	0.655172
5	101012088	101031287	rs3912797	rs900106	19200	14	0	0.0909091	1.05455	1.05455
5	101065881	101094632	rs1351512	rs6893874	28752	12	0	0.0909091	0.890909	0.890909
5	106929182	106953237	rs250253	rs697623	24056	13	0.0178571	0.142857	0.392857	0.517857	Chr5:106792567..107082812	EFNA5
5	111729915	111734970	rs17134350	rs6594588	5056	5	0.0357143	0.178571	0.517857	0.553571	Chr5:111576914..111831226	EPB41L4A
5	116562738	116601814	rs2036023	rs6595016	39077	21	0.037037	0.148148	0.240741	0.277778
5	116651065	116698274	rs1021518	rs7723109	47210	19	0	0.277778	0.388889	0.444444
5	116910094	116915817	rs1428058	rs265929	5724	5	0.0175439	0.175439	0.701754	0.701754
5	116986269	117057528	rs265919	rs192379	71260	40	0	0.0877193	0.421053	0.45614
5	117070053	117082287	rs841999	rs951482	12235	8	0	0.280702	0.403509	0.421053
5	117103088	117124537	rs1526882	rs10478366	21450	12	0	0.0847458	0.745763	0.745763
5	117423746	117475962	rs2416494	rs11750597	52217	21	0	0.2	0.163636	0.218182
5	117480167	117642506	rs7703873	rs1479211	162340	77	0	0.0909091	0	0.0727273
5	117710846	117739527	rs1479224	rs10075928	28682	9	0	0.290909	0.290909	0.381818
5	117781102	117790836	rs11949883	rs7721152	9735	7	0	0.20339	0.305085	0.440678
5	118231878	118320581	rs1366457	rs1473337	88704	28	0.0178571	0.0892857	0.285714	0.321429	Chr5:118251452..118400456	FLJ33977
5	118472255	118505806	rs299218	rs6421880	33552	13	0.0178571	0.160714	0.178571	0.25	Chr5:118483401..118661038	DMXL1
5	118589258	118616507	rs4421136	rs2896839	27250	11	0.0181818	0.236364	0.236364	0.327273	Chr5:118483401..118661038	DMXL1
5	119286405	119304192	rs4461664	rs7727521	17788	7	0	0.178571	0.660714	0.678571
5	119800641	119943197	rs17422615	rs9327147	142557	57	0	0.037037	0.388889	0.425926	Chr5:119876235..120099181	LOC51334
5	124531396	124566931	rs4590178	rs920385	35536	24	0	0	0.12963	0.296296	Chr5:124320741..124688918	LOC391829
5	132676103	132683614	rs11949143	rs1991467	7512	6	0.037037	0.236364	1.05556	1.03636	Chr5:132608368..133024471	KIAA1061
5	141372354	141415837	rs252143	rs2232196	43484	24	0.0338983	0.0847458	0.237288	0.322034	Chr5:141374938..141397255	RNF14	Chr5:141408737..141421093	GNPDA1
5	152851004	152864157	rs7730730	rs17114570	13154	4	0.0185185	0.218182	0.0925926	0.418182
5	153544831	153564656	rs815607	rs1346483	19826	12	0	0.236364	0.145455	0.309091
5	156973110	157006252	rs6878446	rs6881684	33143	12	0.0185185	0.222222	0.537037	0.62963	Chr5:156885207..156983663	ADAM19
5	171400580	171450667	rs7707358	rs1139955	50088	19	0.0357143	0.178571	0.821429	0.821429	Chr5:171269478..171414583	FBXW1B
5	171986179	172004238	rs6556030	rs1107776	18060	6	0	0.222222	0.518519	0.555556
5	174135441	174148546	rs906469	rs11740641	13106	8	0	0.105263	0.526316	0.596491	Chr5:174132525..174138825	MSX2
5	174345010	174362503	rs2042158	rs7729084	17494	10	0	0.163636	0.818182	0.818182
5	175116239	175170711	rs2382070	rs7720700	54473	23	0	0.037037	0.796296	0.796296
5	176246754	176263655	rs7734818	rs2884479	16902	10	0	0.0701754	0.77193	0.77193
6	3033939	3049695	rs9501919	rs10498658	15757	9	0.0338983	0.0847458	0.474576	0.525424	Chr6:3022057..3059173	RIPK1
6	3156614	3190851	rs4296931	rs9501957	34238	19	0.0178571	0.0357143	0.982143	0.982143	Chr6:3169729..3172967	MGC8685
6	10799959	10830559	rs12665162	rs12663432	30601	12	0.0175439	0.157895	1.05263	1.05263	Chr6:10779639..10802764	LOC389366	Chr6:10803176..10817958	PAK1IP1
6	13569342	13574670	rs6900571	rs2841556	5329	5	0.0181818	0.236364	1.09091	1.09091	Chr6:13471798..13595766	GFOD1
6	14737640	14744942	rs1267524	rs707824	7303	6	0.0166667	0.283333	0.833333	0.833333
6	14781934	14788086	rs857405	rs857455	6153	5	0.0166667	0.2	0.983333	0.983333
6	14838515	14856055	rs6914361	rs9367850	17541	10	0.0185185	0.166667	0.87037	0.888889
6	17587645	17595485	rs6905681	rs9477456	7841	5	0	0.241379	0.568966	0.637931	Chr6:17501715..17666002	CAP2
6	20550833	20567652	rs7764857	rs4710930	16820	8	0	0.109091	0.907407	0.909091	Chr6:20510377..20601921	E2F3	Chr6:20559274..20560655	PRO1051
6	23673509	23697115	rs197947	rs197973	23607	16	0.0181818	0.0909091	0.290909	0.327273
6	50003035	50032217	rs9473705	rs673551	29183	13	0	0.22807	0.631579	0.666667
6	50043737	50101552	rs9473722	rs1033882	57816	29	0	0.105263	0.298246	0.350877
6	53279930	53319109	rs1579454	rs9474525	39180	21	0	0.0727273	0.618182	0.654545
6	56554325	56592728	rs1024196	rs6927032	38404	18	0.0181818	0.109091	0.981818	0.981818	Chr6:56369630..56755299	BPAG1
6	67148579	67185315	rs1473876	rs6455109	36737	20	0.0350877	0.122807	0.473684	0.491228
6	68983074	68995972	rs778024	rs10455213	12899	5	0.0181818	0.290909	0.436364	0.472727
6	84735992	84744619	rs2480181	rs11970690	8628	5	0.0166667	0.266667	0.916667	0.916667	Chr6:84739016..84796195	C6orf117
6	84791959	84843440	rs2480196	rs728721	51482	21	0	0.203704	0	0.759259	Chr6:84739016..84796195	C6orf117	Chr6:84829568..84932910	C6orf84
6	84849219	84868676	rs9449802	rs9449815	19458	11	0.0363636	0.181818	0.963636	0.963636	Chr6:84829568..84932910	C6orf84
6	89277319	89286312	rs2757745	rs6926238	8994	5	0.0185185	0.0925926	0.537037	0.592593
6	91082060	91087950	rs790595	rs790584	5891	3	0	0.259259	0.111111	0.37037
6	95505459	95514921	rs7766838	rs9452962	9463	8	0.037037	0.203704	0.648148	0.666667
6	100307973	100327281	rs6916883	rs4640896	19309	7	0.037037	0.148148	0.0185185	0.185185
6	105862948	105867735	rs717324	rs6914611	4788	4	0	0.25	0.366667	0.416667	Chr6:105771076..105896539	PREP
6	105907584	105950723	rs6923344	rs7743123	43140	19	0	0.166667	0.333333	0.388889
6	105952952	105992781	rs9486104	rs6568376	39830	17	0	0.122807	0.403509	0.403509
6	117357325	117379697	rs874403	rs490154	22373	16	0.037037	0.240741	0.555556	0.648148
6	125183726	125201243	rs12213354	rs781721	17518	6	0.0166667	0.133333	0.35	0.366667
6	125736764	125771598	rs731500	rs9482661	34835	21	0	0.111111	0.333333	0.351852
6	126422953	126469896	rs11963634	rs9375427	46944	16	0.0185185	0.0925926	0.037037	0.166667
6	126592163	126754057	rs614433	rs2184967	161895	46	0	0.0862069	0.0689655	0.155172
6	126762004	126818349	rs4895808	rs13214245	56346	18	0	0.20339	0.135593	0.322034
6	126995653	127061270	rs864937	rs1015446	65618	27	0	0.196429	0.196429	0.392857
6	128722046	128749842	rs9398869	rs1935129	27797	9	0	0.037037	0.462963	0.481481	Chr6:128270502..128822293	PTPRK
6	129282147	129334989	rs9492172	rs4469321	52843	25	0	0.0714286	0.446429	0.464286	Chr6:129184912..129818281	LAMA2
6	135589007	135597202	rs6904233	rs2142956	8196	4	0.0172414	0.241379	0.965517	0.965517	Chr6:135585694..135799453	AHI1
6	139633458	139640661	rs11754546	rs6925308	7204	4	0.0333333	0.283333	0.316667	0.4
6	139662302	139686792	rs11963903	rs6927712	24491	10	0	0.0862069	0.438596	0.482759	Chr6:139673966..139676310	CITED2
6	161497347	161511415	rs7748827	rs3798926	14069	7	0.037037	0.0925926	0.703704	0.722222	Chr6:161466394..161604325	AGPAT4
6	163977703	163984130	rs10806782	rs1407658	6428	5	0.0178571	0.206897	0.214286	0.344828
6	163991478	163999026	rs7773362	rs6912660	7549	5	0.0185185	0.107143	0.425926	0.535714
6	169433565	169445090	rs9688600	rs9294981	11526	6	0	0.169492	0.40678	0.508475
7	1218269	1237705	rs10266549	rs12535457	19437	6	0.037037	0.222222	0.740741	0.740741	Chr7:1108564..1271760	MGC11257	Chr7:1218340..1243447	FLJ23471
7	4537100	4606597	rs748973	rs3816852	69498	15	0	0.0555556	0.703704	0.722222	Chr7:4521357..4578364	KIAA0415	Chr7:4578623..4667623	FLJ10324
7	15330661	15347607	rs11508468	rs6461189	16947	8	0.0357143	0.107143	0.339286	0.339286	Chr7:15174573..15331677	LOC221813
7	18811011	18874304	rs2214627	rs10228000	63294	18	0.0166667	0.05	0.916667	0.916667	Chr7:18607934..19107995	HDAC9
7	28602131	28630358	rs4722856	rs10228137	28228	12	0.0178571	0.160714	0.714286	0.714286	Chr7:28441821..28962563	CREB5
7	29410863	29431099	rs850015	rs1641209	20237	6	0.0181818	0.232143	0.436364	0.517857	Chr7:29337201..29655844	CHN2	Chr7:29427810..29431899	LOC401319
7	29989286	30038294	rs6952286	rs6949732	49009	24	0.0185185	0.0555556	0.944444	0.944444
7	30044849	30086176	rs6958536	rs42574	41328	9	0.0185185	0.240741	1.03704	1.03704	Chr7:30062251..30131906	SCRN1	Chr7:30066195..30149580	LOC223082
7	30172342	30215131	rs7804909	rs5743365	42790	15	0	0.0689655	0.775862	0.775862	Chr7:30170817..30232881	FAPP2	Chr7:30206422..30260537	CARD4
7	36789063	36818001	rs1424299	rs10488031	28939	8	0.037037	0.0909091	0.703704	0.690909	Chr7:36635113..37229251	ELMO1	Chr7:36643475..36854911	AOAH
7	36866164	36885213	rs7785477	rs7809487	19050	8	0.0185185	0.22807	0.5	0.473684	Chr7:36635113..37229251	ELMO1
7	40229632	40349570	rs12666860	rs10277710	119939	34	0.037037	0.0740741	0.592593	0.592593	Chr7:39915355..40641137	C7orf10	Chr7:40249345..40251219	C7orf11	Chr7:40251578..40978748	C7orf10
7	54916091	54923191	rs2330951	rs759160	7101	4	0.0333333	0.25	0.166667	0.216667	Chr7:54828474..55016780	EGFR	Chr7:54919654..54926633	SEC61G
7	94112477	94128752	rs7801267	rs4729161	16276	6	0.0350877	0.157895	0.157895	0.403509	Chr7:94072023..94123813	ASB4
7	98502382	98546730	rs6651108	rs10247946	44349	15	0.0185185	0.148148	0.592593	0.592593	Chr7:98447849..98515829	FLJ22037	Chr7:98478110..98507232	TRIM4	Chr7:98511247..98517322	GJE1	Chr7:98534907..98575282	ARPC1A
7	98976848	99030623	rs2687117	rs667660	53776	12	0	0.05	0.866667	0.866667	Chr7:98961112..98987765	PILRA	Chr7:98966001..98993205	CYP3A4	Chr7:98988538..99016345	ZCWPW1	Chr7:99017297..99021784	FLJ20257	Chr7:99022955..99024137	MGC22793
7	101248040	101292146	rs375417	rs446076	44107	18	0	0.163636	0.327273	0.4	Chr7:101019473..101487431	CUTL1	Chr7:101213645..101250725	RASA4	Chr7:101274646..101305643	POLR2J2
7	107205124	107265385	rs3814473	rs5006549	60262	19	0	0.0555556	0.851852	0.851852	Chr7:107204474..107209841	THAP5	Chr7:107210300..107215238	DNAJB9	Chr7:107224527..107331331	LAMB4
7	107272605	107280693	rs1109110	rs9690688	8089	5	0	0.0862069	0.896552	0.896552	Chr7:107224527..107331331	LAMB4
7	109077790	109118382	rs1524467	rs2107169	40593	18	0.0333333	0.133333	0.966667	0.966667
7	109825875	109852802	rs1525664	rs10261450	26928	9	0	0.0555556	0.240741	0.314815
7	112192599	112268951	rs1017600	rs1852914	76353	31	0.0363636	0.0909091	0.545455	0.545455
7	116923090	117005295	rs739797	rs2111204	82206	42	0	0.0689655	0.172414	0.206897	Chr7:116905208..117068064	CORTBP2
7	118264257	118329606	rs10238286	rs2896272	65350	25	0.0357143	0.142857	0.642857	0.678571
7	118760599	118828140	rs10228248	rs4236611	67542	22	0.0178571	0.214286	0.571429	0.642857
7	118870452	118900383	rs12539686	rs7782632	29932	14	0.0178571	0.267857	0.642857	0.714286
7	118903995	118952552	rs4730933	rs11487119	48558	22	0.0181818	0.163636	0.636364	0.709091	Chr7:118938853..119415495	KCND2
7	118962117	118974602	rs1949782	rs6975903	12486	6	0.0357143	0.267857	0.642857	0.714286	Chr7:118938853..119415495	KCND2
7	118976666	118995395	rs6968560	rs10500077	18730	9	0	0.214286	0.642857	0.714286	Chr7:118938853..119415495	KCND2
7	119004970	119037570	rs1608585	rs7797664	32601	17	0.0181818	0.272727	0.654545	0.727273	Chr7:118938853..119415495	KCND2
7	119091873	119120667	rs11764046	rs6958697	28795	12	0.0178571	0.285714	0.625	0.696429	Chr7:118938853..119415495	KCND2
7	119293455	119301762	rs10272387	rs10487418	8308	5	0.0178571	0.267857	1.05357	1.05357	Chr7:118938853..119415495	KCND2
7	129174930	129182576	rs10232416	rs2037695	7647	3	0	0.210526	0.421053	0.491228	Chr7:129161513..129319268	COPG2
7	129341232	129354805	rs10272386	rs4439066	13574	6	0.0357143	0.0714286	0.464286	0.517857
7	130939932	130953550	rs1425087	rs4731822	13619	11	0	0.125	0.428571	0.517857	Chr7:130766587..131228934	LOC401404
7	130960278	131032519	rs1364720	rs1593305	72242	32	0	0.0357143	0.410714	0.446429	Chr7:130766587..131228934	LOC401404
7	135257022	135283918	rs12531124	rs10488404	26897	13	0	0.145455	0.2	0.254545	Chr7:135193770..135786704	LOC401406
7	135856229	135949021	rs2161867	rs2882494	92793	34	0	0.140351	0	0.315789	Chr7:135890165..136006347	PTN
7	136342451	136347584	rs1864609	rs322302	5134	5	0	0.166667	0.483333	0.533333	Chr7:136052184..136510771	DGKI	Chr7:136328382..136444566	PTN
7	136721640	136746744	rs834449	rs3800618	25105	13	0.0185185	0.111111	0.981481	0.981481	Chr7:136490417..136947629	DGKI	Chr7:136740195..136782036	AKR1D1
7	138626384	138654822	rs6958862	rs11971873	28439	14	0.0166667	0.0666667	0.65	0.666667	Chr7:138490419..138681370	TBXAS1
7	139739339	139759202	rs269260	rs10441215	19864	7	0.0344828	0.137931	0.672414	0.706897
7	142030331	142094509	rs8177130	rs1568760	64179	28	0	0.0181818	0.854545	0.854545	Chr7:142023753..142039777	EPHB6	Chr7:142036395..142042037	LOC51064	Chr7:142039890..142054407	TRPV6	Chr7:142057890..142060968	FLJ90586	Chr7:142061229..142081214	CASP2	Chr7:142076197..142101835	TRPV5	Chr7:142086204..142086584	LOC402709	Chr7:142089649..142125535	CLCN1
7	142101464	142118650	rs4252372	rs7806742	17187	9	0.0175439	0.0350877	0.894737	0.894737	Chr7:142076197..142101835	TRPV5	Chr7:142089649..142125535	CLCN1	Chr7:142107529..142108885	C7orf34	Chr7:142109131..142130433	KEL
7	142457614	142489680	rs3181165	rs2272258	32067	13	0	0.157895	0.263158	0.280702	Chr7:142456332..142475715	CASP2	Chr7:142464660..142467267	MGC41943	Chr7:142477992..142493853	LOC393041	Chr7:142480704..142481084	LOC346521	Chr7:142484149..142520027	CLCN1
7	143621913	143664143	rs6972416	rs717885	42231	19	0.0166667	0.0666667	0.833333	0.85	Chr7:143540784..143924874	TPK1
7	143703762	143709251	rs7788824	rs7805109	5490	4	0.0166667	0.233333	0.833333	0.833333	Chr7:143540784..143924874	TPK1	Chr7:143705852..143706799	LOC393061
7	143715498	143724105	rs6967455	rs11980724	8608	5	0.0333333	0.1	0.85	0.85	Chr7:143540784..143924874	TPK1
7	143747937	143759319	rs10487639	rs6464606	11383	6	0.0333333	0.216667	0.7	0.733333	Chr7:143540784..143924874	TPK1
7	143767216	143771170	rs10276866	rs6956805	3955	4	0.0166667	0.183333	0.716667	0.75	Chr7:143540784..143924874	TPK1
7	143773643	143783534	rs6464610	rs13438381	9892	2	0.0166667	0.25	0.683333	0.716667	Chr7:143540784..143924874	TPK1
7	143784828	143789724	rs6464611	rs2189738	4897	2	0.0338983	0.254237	0.915254	0.915254	Chr7:143540784..143924874	TPK1
7	143798059	143799494	rs6954373	rs13437960	1436	2	0.0333333	0.233333	0.9	0.9	Chr7:143540784..143924874	TPK1
7	145352685	145363790	rs802569	rs6949894	11106	6	0.0357143	0.232143	1.03571	1.03571
7	145400308	145429259	rs10281206	rs7805444	28952	13	0	0.0727273	0.927273	0.927273
7	145808403	145811067	rs7777225	rs344468	2665	2	0.0338983	0.271186	0.79661	0.79661	Chr7:145440401..147087340	CNTNAP2
7	146753944	146798564	rs851732	rs758259	44621	12	0.0185185	0.166667	0.814815	0.814815	Chr7:145440401..147087340	CNTNAP2	Chr7:145863104..147509827	CNTNAP2
7	147513925	147531140	rs2079616	rs17616479	17216	5	0.0333333	0.2	0.716667	0.716667	Chr7:147523380..147535014	LOC392145
7	148188074	148198399	rs10245343	rs10265213	10326	5	0.0363636	0.181818	0.527273	0.581818	Chr7:148191633..148215119	LOC155054
7	150875637	150880741	rs11763144	rs7796138	5105	3	0.0178571	0.285714	0.839286	0.839286	Chr7:150645766..150965536	PRKAG2	Chr7:150790999..151090381	MLL3
7	153439056	153460880	rs6464414	rs2075135	21825	11	0.037037	0.163636	0.759259	0.763636	Chr7:152708531..153538449	DPP6
7	155141042	155155712	rs4716933	rs4716946	14671	6	0.0181818	0.181818	0.927273	0.963636	Chr7:155124135..155257527	LOC392849
8	1934454	1956544	rs4541975	rs9314445	22091	11	0.0363636	0.2	0.2	0.218182	Chr8:1909451..1942509	LOC401444
8	2950903	2957838	rs10503191	rs4875767	6936	7	0.0350877	0.192982	0.631579	0.684211	Chr8:2782789..4839736	CSMD1
8	8852434	8858925	rs7843864	rs4840381	6492	3	0.0350877	0.0877193	0.210526	0.298246	Chr8:8850409..8857011	LOC392192
8	8906445	8919230	rs9650628	rs1016512	12786	4	0.0172414	0.293103	0.258621	0.448276	Chr8:8897860..8925899	3'HEXO
8	8939781	8944967	rs11787026	rs13273769	5187	4	0.0350877	0.263158	0.263158	0.421053
8	8972130	8977241	rs6997088	rs6987277	5112	6	0.037037	0.12963	0.166667	0.296296
8	10888865	10915767	rs4507728	rs11250110	26903	13	0	0.277778	0.388889	0.425926	Chr8:10791064..10897401	LOC286046
8	10918818	10943004	rs10111872	rs10903337	24187	12	0	0.107143	0.160714	0.214286
8	10961779	10996264	rs11780798	rs6651506	34486	17	0	0.0925926	0.12963	0.148148
8	11010246	11032470	rs10503414	rs3021496	22225	11	0.0185185	0.166667	0.185185	0.296296	Chr8:11018301..11020984	C8orf15	Chr8:11031822..11033527	C8orf6
8	11124885	11128546	rs920047	rs2736316	3662	4	0	0.192982	0.263158	0.333333
8	11261520	11289115	rs920046	rs1435282	27596	13	0	0.277778	0.203704	0.388889	Chr8:11234556..11263371	TDH	Chr8:11263321..11333576	C8orf12
8	11309574	11318683	rs7836059	rs2409764	9110	5	0	0.2	0.163636	0.254545	Chr8:11263321..11333576	C8orf12	Chr8:11316382..11361663	C8orf13
8	11464199	11472925	rs1382563	rs10108511	8727	6	0	0.148148	0.0555556	0.277778	Chr8:11471453..11476259	C8orf14
8	11480745	11503703	rs4841568	rs2253828	22959	12	0	0.0535714	0.142857	0.25
8	11814313	11844985	rs10435719	rs11250182	30673	10	0	0.203704	0.314815	0.462963	Chr8:11797234..11815744	LOC392194	Chr8:11823686..11824460	LOC389626
8	16404668	16409527	rs11990645	rs11987842	4860	3	0.0169492	0.237288	0.288136	0.423729
8	16544603	16563529	rs1541932	rs822258	18927	12	0	0.192982	0.196429	0.350877
8	16566397	16599477	rs7012141	rs520207	33081	18	0.0181818	0.163636	0.2	0.381818
8	16658475	16662470	rs11985935	rs540481	3996	4	0.0178571	0.25	0.232143	0.5
8	20802627	20809948	rs7002145	rs7840619	7322	5	0.0172414	0.189655	0.568966	0.586207
8	23097792	23101732	rs4872087	rs7460036	3941	3	0.0344828	0.293103	0.206897	0.551724	Chr8:23070908..23104577	TNFRSF10A
8	24749811	24752881	rs196899	rs999575	3071	4	0.0175439	0.280702	0.736842	0.736842
8	34747028	34834704	rs7015192	rs10093106	87677	35	0.0166667	0.0166667	0.966667	0.966667	Chr8:34789346..34789821	LOC389646
8	36219087	36316140	rs7819939	rs6998414	97054	16	0.0181818	0.107143	0.2	0.375
8	36576637	36688429	rs10106381	rs9297244	111793	35	0	0.0357143	0.392857	0.410714	Chr8:36476196..36604492	LOC392212
8	40373387	40380246	rs4388449	rs10091962	6860	3	0.0175439	0.280702	0.368421	0.403509
8	40399946	40418233	rs2599682	rs4431581	18288	8	0.0175439	0.122807	0.403509	0.421053	Chr8:40405481..40772711	FLJ13842
8	40424004	40428509	rs10095383	rs6983903	4506	4	0.0166667	0.233333	0.75	0.766667	Chr8:40405481..40772711	FLJ13842
8	64532595	64548321	rs993513	rs6472116	15727	7	0	0.218182	0.618182	0.636364
8	64675253	64694192	rs1217103	rs7823250	18940	10	0	0.160714	0.535714	0.571429
8	66513175	66518789	rs7015769	rs11783633	5615	4	0	0.296296	0.222222	0.537037	Chr8:66489204..66524848	LOC286186
8	66623408	66670320	rs13281002	rs13274205	46913	16	0	0.232143	0.0909091	0.482143	Chr8:66606935..66706445	CHPPR
8	67671387	67774436	rs10100840	rs7002788	103050	27	0.0363636	0.127273	0.818182	0.836364	Chr8:67729593..67730201	PTTG3	Chr8:67737423..67824218	SGKL
8	68863120	68903431	rs6472353	rs4515534	40312	24	0	0.259259	0.666667	0.685185
8	73848456	73856186	rs7822203	rs7822651	7731	6	0.0181818	0.163636	0.236364	0.327273	Chr8:73499587..73900545	KCNB2
8	75724820	75732497	rs11996191	rs1392966	7678	5	0.037037	0.240741	0.555556	0.685185
8	81375887	81385242	rs534369	rs272605	9356	5	0.0363636	0.2	0.509091	0.509091
8	81680020	81757541	rs6998595	rs10504718	77522	19	0	0.0727273	0.425926	0.436364
8	81946298	81950806	rs999450	rs6998543	4509	3	0.0166667	0.216667	0.833333	0.85	Chr8:81936364..81992216	PAG
8	82045554	82052343	rs7828228	rs6985240	6790	5	0.0333333	0.166667	1	1
8	82099819	82206515	rs7833919	rs9298347	106697	44	0	0.0727273	0.037037	0.145455	Chr8:82096121..82194159	LOC392238
8	87041105	87049416	rs7829242	rs10955796	8312	4	0.0344828	0.241379	0.637931	0.689655
8	91671611	91689569	rs13271082	rs9297885	17959	6	0.0344828	0.206897	0.568966	0.655172
8	92316776	92354873	rs6471277	rs10102673	38098	19	0.0178571	0.0714286	0.232143	0.232143	Chr8:92218099..92366961	SLC26A7
8	92363742	92419277	rs11986042	rs16913650	55536	27	0.0172414	0.137931	0.603448	0.603448	Chr8:92218099..92366961	SLC26A7
8	93055507	93103619	rs720444	rs10110490	48113	21	0	0.122807	0.45614	0.491228	Chr8:92927735..93064026	CBFA2T1	Chr8:93084151..93113246	LOC401470
8	96080974	96094038	rs2044034	rs192714	13065	6	0.0185185	0.203704	0.277778	0.333333
8	101978079	101997399	rs6468751	rs7008091	19321	5	0.0185185	0.185185	0.944444	0.944444	Chr8:101975788..101994110	LOC401471
8	105997159	106002823	rs3107545	rs285857	5665	5	0.037037	0.203704	0.740741	0.759259
8	111683598	111743854	rs11992740	rs11987583	60257	23	0	0.189655	0.758621	0.758621
8	117125297	117205789	rs1022440	rs2873245	80493	18	0.0181818	0.0350877	0.381818	0.385965
8	120819535	120836188	rs6988701	rs16893252	16654	10	0.0357143	0.25	0.339286	0.428571	Chr8:120802804..120824737	MGC5528
8	122519035	122538214	rs4871206	rs7839029	19180	7	0	0.157895	0.631579	0.631579
8	127028587	127056126	rs2957795	rs10505467	27540	14	0	0.178571	0.660714	0.678571
8	129490235	129530734	rs1516982	rs7845277	40500	33	0	0.0185185	0.314815	0.351852
8	129536168	129549383	rs2395822	rs1443123	13216	7	0.0363636	0.2	0.290909	0.381818
8	129870837	129902743	rs7009139	rs987525	31907	16	0.037037	0.148148	0.296296	0.296296
8	131904650	131917245	rs6993226	rs7815277	12596	8	0	0.0714286	0.803571	0.803571	Chr8:131725265..132011261	ADCY8
8	134814621	134833041	rs7832591	rs4897697	18421	13	0	0.2	0.218182	0.327273
8	134859326	134880797	rs6471167	rs7846315	21472	16	0	0.240741	0.166667	0.222222
8	134943080	134957001	rs10105604	rs4897654	13922	10	0.0344828	0.206897	0.275862	0.37931
8	134989651	135024391	rs10505615	rs1457485	34741	20	0.0166667	0.05	0.266667	0.383333
8	135113077	135117334	rs7836985	rs4897684	4258	5	0	0.125	0.357143	0.464286
8	138947714	138988287	rs10090942	rs4455874	40574	25	0.0363636	0.145455	0.327273	0.418182	Chr8:138792743..139066844	LOC401478
8	139024425	139054833	rs6986279	rs6577869	30409	16	0.0185185	0.037037	0.037037	0.111111	Chr8:138792743..139066844	LOC401478
8	139057541	139061288	rs10505692	rs4361788	3748	6	0	0.283333	0.183333	0.3	Chr8:138792743..139066844	LOC401478
8	139476477	139485027	rs10107359	rs6992821	8551	7	0.0338983	0.288136	0.644068	0.661017
8	139832765	139852757	rs6988991	rs11994766	19993	7	0.037037	0.259259	0.481481	0.5	Chr8:139571534..139897292	COL22A1
8	145200642	145224629	rs7840556	rs7017102	23988	6	0.0333333	0.1	0.866667	0.866667	Chr8:145192588..145207996	MGC61633	Chr8:145208739..145212088	LOC392275	Chr8:145212208..145224818	OPLAH
8	145234877	145255285	rs11986602	rs11780874	20409	7	0.0333333	0.15	0.833333	0.833333	Chr8:145239510..145241531	RRP41	Chr8:145243520..145247095	GPAA1
8	145259119	145365387	rs13254954	rs6558321	106269	23	0.0166667	0.05	0.633333	0.633333	Chr8:145259522..145265074	DKFZP434N1923	Chr8:145265386..145268496	MAF1	Chr8:145268610..145279199	KIAA1875	Chr8:145298653..145337431	LOC51236	Chr8:145303462..145304852	LOC402353	Chr8:145309884..145422624	LOC402354
9	426946	431952	rs955221	rs1887957	5007	6	0.0178571	0.214286	0.464286	0.5	Chr9:317258..455241	DOCK8
9	432272	460035	rs965057	rs913699	27764	14	0.0178571	0.125	0.446429	0.482143	Chr9:317258..455241	DOCK8
9	485701	508675	rs6476918	rs7026716	22975	14	0	0.103448	0.258621	0.362069
9	922251	929653	rs10816069	rs10491584	7403	5	0.0350877	0.22807	0.754386	0.807018	Chr9:831690..959090	DMRT1
9	1829882	1841231	rs872363	rs10114691	11350	9	0	0.0740741	0.722222	0.722222
9	13871563	13889978	rs7023898	rs1359847	18416	8	0	0.267857	0.25	0.303571
9	16237124	16247601	rs1010634	rs1029081	10478	9	0.037037	0.166667	0.240741	0.314815
9	17545830	17559130	rs2754331	rs7039273	13301	8	0	0.203704	0.833333	0.833333
9	21934818	21937957	rs4382559	rs6475599	3140	3	0	0.283333	0.733333	0.766667
9	23021321	23032805	rs7023567	rs10965572	11485	9	0.0181818	0.0909091	0.290909	0.381818
9	32729599	32736384	rs960083	rs1329000	6786	9	0.0185185	0.185185	0.425926	0.444444
9	71714473	71715840	rs7875635	rs2502788	1368	2	0.0333333	0.266667	0.933333	0.933333	Chr9:71715450..71721876	LOC138972
9	76515537	76535257	rs17726123	rs3010671	19721	6	0.0333333	0.266667	0.816667	0.816667
9	78069453	78074266	rs6559520	rs4472596	4814	4	0.0333333	0.133333	0.266667	0.316667
9	83185793	83201549	rs7856258	rs2004918	15757	8	0.0333333	0.1	0.516667	0.583333
9	84193562	84202841	rs12348642	rs11141253	9280	5	0.0333333	0.266667	0.283333	0.516667
9	106424788	106436555	rs7029971	rs7028041	11768	7	0.0181818	0.125	0.218182	0.375
9	115866434	115879064	rs6478322	rs1927887	12631	6	0.0344828	0.241379	0.362069	0.5
9	117494159	117496600	rs7039577	rs4540472	2442	4	0	0.254237	0.0677966	0.237288	Chr9:117304953..117507746	DBC1
9	117937205	117942404	rs1413324	rs2151641	5200	6	0	0.15	0.6	0.666667
9	118001271	118029598	rs10984729	rs7042352	28328	16	0	0.15	0.65	0.7
9	120179305	120197271	rs10818620	rs10513389	17967	8	0.0185185	0.0925926	0.574074	0.611111	Chr9:119960337..120231608	LOC158135
9	128611940	128626364	rs1215984	rs504752	14425	8	0	0.0727273	0.581818	0.618182	Chr9:128596353..128652706	ASS
9	129003039	129017671	rs10124570	rs12003046	14633	10	0.0185185	0.166667	0.796296	0.814815	Chr9:128865752..129039105	ABL1
9	131977142	131989357	rs590614	rs525060	12216	10	0	0.148148	0.111111	0.166667	Chr9:131968749..132199138	VAV2
9	132111174	132111621	rs2519789	rs2789823	448	3	0	0.296296	0.666667	0.722222	Chr9:131968749..132199138	VAV2
9	132223056	132226788	rs10821543	rs6479635	3733	2	0.0333333	0.266667	0.45	0.516667	Chr9:132200969..132231175	LOC389803
9	135940989	135950005	rs11137254	rs9410050	9017	5	0	0.233333	0.983333	0.983333	Chr9:135824031..135949193	Eu-HMTase1
10	2949625	2969620	rs1875158	rs4880582	19996	9	0.0363636	0.0727273	0.945455	0.945455
10	4624005	4632941	rs400541	rs11252632	8937	6	0.0185185	0.222222	0.388889	0.444444
10	7432945	7470144	rs7097814	rs2249836	37200	17	0.0181818	0.0892857	0.472727	0.482143	Chr10:7208255..7494430	SFMBT2
10	11021670	11028565	rs201091	rs201099	6896	5	0	0.15	0.566667	0.566667
10	11034693	11079139	rs7081160	rs7090372	44447	19	0	0.12963	0.537037	0.537037	Chr10:11064071..11380358	CUGBP2
10	11092017	11093149	rs1291873	rs1291878	1133	3	0.0185185	0.259259	0.425926	0.5	Chr10:11064071..11380358	CUGBP2
10	11114068	11134928	rs2762537	rs7080063	20861	13	0	0.203704	0.37037	0.5	Chr10:11064071..11380358	CUGBP2
10	15121120	15131993	rs7901579	rs10906823	10874	6	0	0.109091	0.2	0.272727
10	15162374	15165280	rs7922108	rs10906832	2907	3	0.0185185	0.296296	0.648148	0.685185	Chr10:15153909..15214663	NMT2
10	15942240	15948143	rs7083054	rs7919133	5904	5	0	0.163636	1	1
10	16638305	16679926	rs7068341	rs7071754	41622	12	0.037037	0.0909091	0.777778	0.781818	Chr10:16636621..16863459	RSU1
10	21483891	21496241	rs10828206	rs10828210	12351	8	0.0338983	0.220339	0.762712	0.779661
10	21506888	21519057	rs7900067	rs7093901	12170	8	0	0.224138	0.568966	0.62069
10	21547046	21560426	rs10828225	rs12241849	13381	6	0.0169492	0.118644	0.576271	0.59322
10	21571442	21599297	rs12358291	rs7922927	27856	12	0	0.0727273	0.254545	0.363636
10	21961235	21970984	rs2183271	rs12250810	9750	5	0.0338983	0.254237	0.372881	0.491525	Chr10:21827273..22035446	MLLT10
10	22054576	22096316	rs7910002	rs4024198	41741	12	0.0350877	0.157895	0.508772	0.596491	Chr10:22049513..22296476	DNAJC1
10	22102707	22151429	rs10828266	rs2066271	48723	13	0.0175439	0.122807	0.333333	0.350877	Chr10:22049513..22296476	DNAJC1
10	22212636	22280825	rs2807978	rs4146689	68190	18	0.037037	0.0740741	0.444444	0.518519	Chr10:22049513..22296476	DNAJC1
10	22303509	22337069	rs7898685	rs12255951	33561	15	0.0185185	0.0740741	0.444444	0.481481
10	22362154	22397696	rs7093775	rs3011641	35543	8	0	0.2	0.381818	0.418182
10	22558459	22643909	rs12247178	rs12257451	85451	34	0.0350877	0.0526316	0.859649	0.859649	Chr10:22559926..22561847	LOC389943	Chr10:22609344..22613237	COMMD3	Chr10:22614146..22624194	BMI1	Chr10:22638405..22710545	SPAG6
10	22675824	22767634	rs11012978	rs7904006	91811	51	0	0.0338983	0.932203	0.932203	Chr10:22638405..22710545	SPAG6
10	22917057	22920970	rs1627983	rs1778317	3914	3	0	0.240741	0.814815	0.833333	Chr10:22829828..23007490	PIP5K2A
10	22998457	23026972	rs7905225	rs6482235	28516	10	0	0.0185185	0.407407	0.462963	Chr10:22829828..23007490	PIP5K2A
10	24345503	24393300	rs7083088	rs12354575	47798	18	0	0.12963	0.62963	0.62963
10	29028136	29032542	rs1014607	rs1248997	4407	5	0	0.2	0.466667	0.516667
10	32364914	32386282	rs211318	rs211365	21369	13	0.0350877	0.157895	0.596491	0.596491
10	33811116	33845278	rs1109168	rs1869236	34163	20	0.0344828	0.206897	0.12069	0.189655
10	48784949	48800935	rs6537556	rs432971	15987	11	0.037037	0.127273	0.518519	0.527273	Chr10:48709205..48804403	MGC35285
10	49470575	49476000	rs2663056	rs10745288	5426	5	0.0350877	0.210526	0.45614	0.526316
10	55236992	55290490	rs4272709	rs12241811	53499	27	0.0185185	0.0555556	0.0740741	0.203704	Chr10:54925463..55905654	PCDH15
10	58173493	58191178	rs11812237	rs1394108	17686	9	0.0338983	0.186441	0.423729	0.474576
10	58942346	58976214	rs10740718	rs2537632	33869	12	0	0.222222	0.388889	0.444444
10	66881167	66889663	rs1670170	rs1670160	8497	3	0.0350877	0.155172	0.789474	0.827586
10	91695196	91743274	rs10509597	rs2104483	48079	24	0	0.2	0.0181818	0.218182
10	102136343	102166158	rs10786603	rs4509693	29816	14	0.037037	0.240741	0.0555556	0.148148
10	102278214	102285084	rs3938475	rs4919504	6871	6	0.0181818	0.0727273	0.236364	0.309091
10	106716226	106757462	rs2930454	rs4636588	41237	16	0.0185185	0.12963	0.518519	0.537037
10	106857617	106893792	rs1459369	rs11592188	36176	15	0.0338983	0.152542	0.542373	0.542373
10	108418630	108424380	rs7919051	rs12261452	5751	6	0.0166667	0.116667	1	1	Chr10:107998008..108588879	SORCS1
10	110830171	110850814	rs3862003	rs3862004	20644	7	0.037037	0.148148	0.666667	0.666667
10	114413084	114476658	rs4074720	rs7077247	63575	27	0.0185185	0.0185185	0.333333	0.425926	Chr10:114374798..114590660	TCF7L2
10	117326766	117340360	rs7086294	rs6585374	13595	9	0.0350877	0.192982	1.01754	1.01754	Chr10:116518097..117373090	KIAA0534
10	126515661	126530895	rs9422862	rs4962442	15235	7	0	0.203704	0.444444	0.462963
10	130008570	130017892	rs12360093	rs973317	9323	5	0.0185185	0.185185	0.851852	0.851852
10	130357382	130390628	rs2123423	rs1929935	33247	15	0.0169492	0.0338983	0.525424	0.525424
10	133540357	133550754	rs10870288	rs6560688	10398	3	0.037037	0.2	0.333333	0.418182	Chr10:133455396..133555877	PKE
11	6654656	6664798	rs4758121	rs7105787	10143	4	0.0338983	0.220339	0.728814	0.745763
11	8221350	8232880	rs204922	rs1377975	11531	5	0.037037	0.181818	0.740741	0.745455	Chr11:8210166..8249715	LMO1
11	12419390	12431853	rs933934	rs1559846	12464	5	0.0333333	0.15	0.85	0.85	Chr11:12363412..12516654	PARVA
11	17685017	17699970	rs3858506	rs4757582	14954	9	0	0.181818	0.418182	0.509091	Chr11:17681847..17758486	KCNC1
11	21736589	21748175	rs2000950	rs1540134	11587	5	0.0350877	0.22807	0.877193	0.877193
11	23645098	23738157	rs1519411	rs4469891	93060	34	0	0.140351	0.45614	0.45614
11	25145606	25150683	rs1584184	rs7102996	5078	4	0.0175439	0.280702	0.403509	0.438596
11	25529828	25544916	rs1348357	rs17308099	15089	5	0.0166667	0.216667	0.666667	0.716667
11	37940613	38006025	rs7937379	rs821052	65413	23	0.0181818	0.109091	0.545455	0.545455
11	39647003	39664576	rs1382080	rs974980	17574	9	0.0169492	0.0847458	0.694915	0.694915
11	60666508	60855219	rs7117160	rs12281828	188712	52	0	0.0555556	0.185185	0.185185	Chr11:60645327..60670684	CD5	Chr11:60673088..60706155	FLJ20847	Chr11:60784029..60794276	PGA5	Chr11:60801120..60837906	FLJ32009	Chr11:60842283..60875909	DDB1
11	60954366	60997095	rs3018727	rs729347	42730	16	0	0.155172	0.689655	0.706897	Chr11:60935439..60958460	MGC:13379	Chr11:60945561..60972633	FLJ12529	Chr11:60972957..60989589	FLJ20487
11	68959210	68988666	rs4075062	rs10737164	29457	8	0.0175439	0.175439	0.684211	0.719298
11	70344313	70355024	rs874708	rs7938826	10712	4	0.0166667	0.166667	0.583333	0.616667	Chr11:70240252..70399170	LOC399921
11	70375481	70402039	rs3019831	rs3019833	26559	11	0	0.0925926	0.611111	0.611111	Chr11:70240252..70399170	LOC399921
11	72845327	72859338	rs12269884	rs2298469	14012	5	0.037037	0.203704	0.759259	0.777778	Chr11:72838154..73035399	KIAA0280
11	78022670	78067613	rs7935784	rs12274219	44944	17	0.0166667	0.1	0.983333	0.983333
11	83889077	83893297	rs1943527	rs1367532	4221	3	0.0333333	0.2	0.983333	0.983333	Chr11:82896987..84360746	DLG2
11	96715386	96790008	rs1426631	rs17130056	74623	31	0	0.0350877	0.375	0.421053
11	96816928	96832433	rs826002	rs12808677	15506	6	0	0.181818	0.611111	0.636364
11	106004406	106025050	rs1938627	rs1793055	20645	7	0.0178571	0.0535714	0.589286	0.625
11	110959866	111049066	rs663763	rs7946320	89201	37	0	0.111111	0.462963	0.592593	Chr11:110948882..110969437	LOC143903	Chr11:111010819..111135284	SIK2
11	115482741	115527249	rs2852813	rs573713	44509	23	0	0.0357143	0.410714	0.410714
11	115597858	115604387	rs1894072	rs7930285	6530	5	0.0172414	0.206897	0.637931	0.655172
11	130177330	130188242	rs6590504	rs10750445	10913	8	0.0172414	0.189655	0.758621	0.758621
12	5629508	5635389	rs393557	rs1860955	5882	6	0.0175439	0.245614	0.385965	0.45614	Chr12:5542081..5925659	TMEM16B
12	5808309	5827405	rs4764518	rs7974448	19097	8	0	0.0535714	0.618182	0.696429	Chr12:5542081..5925659	TMEM16B
12	8421829	8533984	rs7484738	rs10734713	112156	23	0.037037	0.0925926	0.592593	0.592593	Chr12:8426120..8427294	LOC399993	Chr12:8427968..8459431	LOC344729	Chr12:8471746..8481457	LOC390288	Chr12:8481479..8482343	LOC390289	Chr12:8504481..8505095	LOC341306
12	10639670	10647879	rs2682484	rs10772332	8210	6	0.0169492	0.254237	0.661017	0.728814	Chr12:10633039..10643431	KLRA1	Chr12:10642069..10648646	LOC400004
12	14248326	14275107	rs6488646	rs4763372	26782	5	0	0.272727	0.818182	0.818182
12	15131540	15138937	rs10772835	rs6488745	7398	4	0.0169492	0.237288	1.01695	1.01695
12	19014057	19043608	rs1021384	rs4426179	29552	12	0.0169492	0.118644	0.457627	0.491525
12	34327745	34361303	rs12372751	rs11053217	33559	9	0	0.277778	0.388889	0.648148
12	34375621	34516384	rs7314206	rs10844899	140764	26	0	0.12963	0.388889	0.648148
12	42702730	42713657	rs842194	rs11182390	10928	7	0	0.185185	0.759259	0.796296	Chr12:42516229..43069808	DKFZp434K2435
12	43106864	43185479	rs1353143	rs11182517	78616	33	0.0181818	0.109091	0.454545	0.472727
12	47554786	47565128	rs903570	rs833480	10343	3	0.0178571	0.214286	0.553571	0.589286
12	48036855	48070081	rs10506285	rs7309610	33227	11	0	0.210526	0.789474	0.824561	Chr12:48047560..48207276	SPATS2
12	48099830	48126747	rs2091801	rs11609068	26918	13	0.037037	0.240741	0.555556	0.62963	Chr12:48047560..48207276	SPATS2
12	48192652	48213415	rs12313583	rs12296440	20764	9	0.0344828	0.275862	0.827586	0.844828	Chr12:48047560..48207276	SPATS2
12	51406903	51415730	rs7294445	rs2669585	8828	9	0	0.0833333	0.533333	0.533333	Chr12:51410476..51413060	LOC400036
12	53277216	53288127	rs10876569	rs1716355	10912	6	0.0178571	0.178571	0.5	0.553571
12	53302830	53315075	rs1532372	rs11832807	12246	3	0	0.259259	0.222222	0.555556	Chr12:53310890..53314930	LACRT
12	58070708	58087919	rs11173024	rs276055	17212	5	0.0185185	0.259259	0.222222	0.351852
12	63537010	63555314	rs7976528	rs939875	18305	9	0.0178571	0.160714	0.785714	0.785714	Chr12:63504677..63558350	KIAA0984
12	69248128	69255848	rs7300723	rs11615170	7721	4	0.037037	0.203704	0.351852	0.444444	Chr12:69201231..69289891	PTPRB
12	69958075	69974269	rs12307112	rs7304901	16195	8	0.0169492	0.271186	0.491525	0.542373
12	70120552	70132651	rs11178798	rs11178804	12100	5	0.0172414	0.12069	0.586207	0.603448	Chr12:70120080..70264889	GPR49
12	76194207	76224656	rs2887518	rs1607784	30450	12	0	0.111111	0.240741	0.333333
12	76577610	76616167	rs10161149	rs770540	38558	20	0.037037	0.111111	0.87037	0.87037
12	83738245	83821618	rs6539865	rs1864660	83374	26	0.0185185	0.0925926	0.296296	0.351852	Chr12:83757879..83809010	SLC6A15
12	86849581	86864860	rs10735267	rs7975690	15280	5	0.0185185	0.277778	0.851852	0.851852
12	86881988	86903882	rs11104702	rs12368863	21895	14	0.037037	0.222222	0.888889	0.888889	Chr12:86876284..86925644	FLJ35821
12	86913196	86930292	rs10777089	rs7306384	17097	7	0.0181818	0.181818	0.854545	0.854545	Chr12:86876284..86925644	FLJ35821
12	91611888	91691525	rs7313548	rs11106700	79638	26	0	0.037037	0.12963	0.277778	Chr12:91671594..91825435	EEA1
12	91695622	91726948	rs11106702	rs7133229	31327	8	0.0185185	0.203704	0.222222	0.462963	Chr12:91671594..91825435	EEA1
12	91796453	91822095	rs2248356	rs12306436	25643	7	0.0363636	0.181818	0.327273	0.509091	Chr12:91671594..91825435	EEA1
12	97180584	97224860	rs1383137	rs10467003	44277	22	0.037037	0.166667	0.611111	0.62963
12	97236645	97262472	rs2372176	rs1420448	25828	12	0	0.12963	0.351852	0.407407
12	98940200	98953702	rs1873570	rs1388441	13503	5	0.0363636	0.127273	0.636364	0.654545	Chr12:98933298..99039093	KIAA0701
12	109953854	109992029	rs732166	rs4766539	38176	13	0.0181818	0.0363636	0.290909	0.527273	Chr12:109949203..110200309	CUTL2
12	111886252	111897552	rs968739	rs11614358	11301	4	0	0.157895	0.263158	0.350877
12	115529429	115535329	rs11829566	rs10507272	5901	5	0.0178571	0.210526	0.392857	0.45614
12	125318478	125351213	rs10744263	rs10466863	32736	9	0	0.0925926	0.62963	0.666667	Chr12:125347763..125348920	PGBD3P3
12	125369282	125397543	rs2215396	rs1029827	28262	12	0	0.142857	0.714286	0.75
12	125600689	125633204	rs1194046	rs12309881	32516	7	0.0181818	0.145455	0.181818	0.363636	Chr12:125568346..125610054	LOC387895
12	129797527	129830584	rs843899	rs2030882	33058	16	0	0.0714286	0.482143	0.482143
12	129866763	129897530	rs1195890	rs2398546	30768	4	0.0185185	0.185185	0.611111	0.62963
13	17767538	17828904	rs1977698	rs7491522	61367	15	0	0.0727273	0.6	0.6	Chr13:17719829..17780105	LOC400097	Chr13:17783866..17788333	LOC390376	Chr13:17795017..17908903	TPIP
13	17832077	17919619	rs2497074	rs1994539	87543	22	0.0185185	0.185185	0.537037	0.555556	Chr13:17795017..17908903	TPIP
13	17930652	18269763	rs4238124	rs11839085	339112	102	0	0.037037	0.333333	0.333333	Chr13:17932153..17933409	ESRRAP	Chr13:17935729..17937040	LOC341757	Chr13:18005880..18044657	HSMPP8	Chr13:18047528..18155082	PSPC1	Chr13:18190274..18190681	LOC390377	Chr13:18209605..18235664	ZNF237	Chr13:18236064..18237976	LOC400099
13	18272834	18281305	rs10781708	rs9506402	8472	7	0.0181818	0.145455	0.654545	0.654545
13	18547239	18555614	rs966556	rs1475247	8376	3	0	0.140351	0.350877	0.403509	Chr13:18546342..18551601	LOC390378
13	19611257	19658998	rs2152244	rs261427	47742	24	0.0175439	0.0350877	0.157895	0.210526	Chr13:19631913..19634781	ESTRRA
13	19721036	19730459	rs1830941	rs9509664	9424	5	0	0.283333	0.25	0.316667	Chr13:19697764..19726746	LOC387905
13	19826870	19835228	rs9509732	rs7332478	8359	4	0	0.116667	0.2	0.283333
13	25126221	25161688	rs9507780	rs9512378	35468	16	0.037037	0.111111	0.444444	0.5	Chr13:25130960..25131964	GPR12
13	31249662	31272475	rs11147506	rs2147356	22814	9	0.0333333	0.15	0.733333	0.766667
13	31723631	31743349	rs7988465	rs570336	19719	10	0.0178571	0.196429	0.428571	0.535714
13	34838617	34856605	rs1927564	rs1927558	17989	9	0	0.203704	0.388889	0.425926
13	34865455	34880608	rs4575408	rs9315425	15154	8	0	0.0909091	0.381818	0.418182
13	36676778	36752673	rs6563606	rs10507472	75896	48	0.0172414	0.0172414	0.965517	0.965517	Chr13:36722018..36735140	BM-002
13	43497965	43557420	rs7991856	rs9534056	59456	28	0	0.127273	0.490909	0.490909	Chr13:43492672..43656237	GTF2F2
13	43566759	43598647	rs9534059	rs957035	31889	13	0	0.127273	0.618182	0.654545	Chr13:43492672..43656237	GTF2F2	Chr13:43564988..43566852	KCTD4
13	43603760	43667868	rs1980759	rs9534090	64109	22	0	0.12963	0.407407	0.444444	Chr13:43492672..43656237	GTF2F2
13	46844858	46856568	rs4151607	rs10507564	11711	12	0.0175439	0.122807	0.947368	0.947368	Chr13:46675912..46854023	RB1
13	46868513	46878365	rs7326934	rs751334	9853	7	0	0.271186	1	1	Chr13:46861100..46905317	CHC1L
13	48222647	48237038	rs9535374	rs2146310	14392	5	0.037037	0.240741	0.148148	0.259259
13	53817744	53832654	rs4424802	rs9527392	14911	6	0.0175439	0.157895	0.894737	0.894737
13	77815092	77818784	rs11839375	rs7983312	3693	2	0.0172414	0.224138	0.931034	0.931034
13	77862515	77879762	rs1335369	rs11842488	17248	8	0	0.137931	0.706897	0.775862	Chr13:77853288..77928211	NDFIP2
13	84354516	84374828	rs4572281	rs4369547	20313	9	0.037037	0.240741	0.333333	0.444444
13	103380270	103413756	rs9586700	rs9519568	33487	17	0.0185185	0.0925926	0.222222	0.296296
13	103899215	103915485	rs778305	rs1766182	16271	8	0.0338983	0.0677966	0.677966	0.711864
13	103920221	103935572	rs1253834	rs9586903	15352	7	0.0338983	0.186441	0.694915	0.728814
13	104585633	104602119	rs6492015	rs1409068	16487	9	0.0357143	0.0892857	0.678571	0.678571
13	107158529	107173611	rs6492149	rs405397	15083	8	0	0.122807	0.719298	0.754386	Chr13:106943590..107558346	MYR8
14	25670104	25703142	rs202928	rs11848101	33039	15	0.0344828	0.293103	0.37931	0.465517
14	27271090	27298417	rs10147557	rs10483343	27328	6	0.0338983	0.118644	1	1
14	28581715	28597238	rs17096283	rs8005030	15524	10	0.0172414	0.206897	0.396552	0.517241
14	30135228	30145745	rs12101002	rs6571449	10518	4	0	0.237288	0.779661	0.779661	Chr14:30020717..30319547	C14orf127
14	32196324	32218760	rs11845003	rs1958052	22437	11	0.0350877	0.175439	0.614035	0.684211	Chr14:31398488..32293413	NPAS3
14	43836499	43883079	rs17116043	rs1952730	46581	11	0.0363636	0.163636	0.763636	0.818182
14	43887449	43971763	rs2183485	rs7149671	84315	19	0.037037	0.240741	0.796296	0.796296	Chr14:43961886..43962644	LOC390474
14	44786876	44798967	rs10498394	rs10083479	12092	8	0.0350877	0.0877193	0.298246	0.438596
14	44803933	44827150	rs4424814	rs2415974	23218	11	0.0175439	0.22807	0.298246	0.491228
14	44840749	44850273	rs10149370	rs1999619	9525	7	0.0175439	0.298246	0.298246	0.508772
14	44860064	44890221	rs945024	rs7159616	30158	11	0.0178571	0.160714	0.303571	0.517857
14	45995240	46004207	rs6572435	rs1955806	8968	5	0.0333333	0.283333	0.483333	0.55
14	46008300	46025900	rs1955802	rs1950390	17601	8	0	0.20339	0.220339	0.40678
14	55624742	55635210	rs1892221	rs7159115	10469	8	0.0185185	0.0925926	0.722222	0.740741
14	55758926	55794078	rs4901768	rs11625755	35153	13	0	0.290909	0.727273	0.745455
14	64490841	64502492	rs4899193	rs1273866	11652	5	0.0178571	0.232143	0.607143	0.625
14	75945280	75974614	rs4145507	rs926114	29335	13	0.0178571	0.178571	0.392857	0.446429	Chr14:75930778..75955200	THSD3	Chr14:75963311..76073151	SPTLC2
14	90735269	90742241	rs1543485	rs2025074	6973	4	0.0178571	0.232143	0.625	0.660714
14	90786448	90807702	rs7161372	rs2896206	21255	9	0.0181818	0.127273	0.709091	0.745455	Chr14:90778966..90952636	SLC24A4
14	100948567	100950103	rs11160686	rs8012282	1537	3	0.0333333	0.183333	0.483333	0.516667	Chr14:100819341..100958858	KIAA0329
14	103906064	103927344	rs10147179	rs10135326	21281	13	0	0.101695	0.932203	0.932203	Chr14:103858042..103908735	MTA1	Chr14:103912807..103918176	CRIP2	Chr14:103925225..103926802	CRIP1
15	22902919	22909925	rs8030934	rs2356294	7007	6	0.0338983	0.169492	0.762712	0.779661	Chr15:22616155..23211970	SNRPN	Chr15:22909053..22912560	IPW
15	22996975	23008968	rs2739779	rs2719927	11994	8	0.0178571	0.214286	1.03571	1.03571	Chr15:22616155..23211970	SNRPN	Chr15:23004200..23004537	PAR4
15	23025594	23068268	rs2714757	rs2714786	42675	18	0	0.160714	1.01786	1.01786	Chr15:22616155..23211970	SNRPN
15	36224423	36230259	rs4924225	rs2036436	5837	4	0.0338983	0.288136	0.186441	0.474576
15	37101601	37105444	rs990536	rs16968140	3844	3	0.0350877	0.245614	0.77193	0.77193
15	37115210	37130362	rs1460793	rs275217	15153	6	0.0350877	0.245614	0.614035	0.614035
15	43848557	43923579	rs7182209	rs4480736	75023	25	0.0181818	0.0181818	0.436364	0.472727	Chr15:43713449..43939323	LOC145660
15	43932099	43979849	rs11852360	rs8024291	47751	21	0	0.148148	0.12963	0.277778	Chr15:43713449..43939323	LOC145660
15	47932258	47935276	rs10519248	rs4359385	3019	4	0.0357143	0.142857	0.214286	0.375	Chr15:47866492..48121569	ATP8B4
15	53610614	53633122	rs7175728	rs7173180	22509	15	0	0.157895	0.0526316	0.280702	Chr15:53628117..53694276	FLJ25756
15	59635294	59655290	rs11852469	rs2245982	19997	11	0.0363636	0.0727273	0.909091	0.909091
15	61918469	61950151	rs3794800	rs894660	31683	14	0.0178571	0.0357143	0.285714	0.464286	Chr15:61915052..62054338	DAPK2
15	62387010	62422076	rs4238425	rs2046356	35067	7	0.037037	0.259259	0.851852	0.87037	Chr15:62373010..62389446	KIAA0101	Chr15:62395837..62463319	TRIP4
15	66284130	66312945	rs3759822	rs7174755	28816	11	0.0181818	0.109091	0.309091	0.418182	Chr15:66285955..66299458	FEM1B	Chr15:66309860..66440295	ITGA11
15	69127843	69144031	rs726225	rs8034330	16189	7	0.0166667	0.133333	0.783333	0.783333
15	69604267	69613687	rs4777413	rs4349100	9421	4	0.0357143	0.25	0.464286	0.607143
15	86730265	86764076	rs8036142	rs744206	33812	15	0.0175439	0.157895	1.03509	1.03509	Chr15:86732478..86740387	MRPL46	Chr15:86740452..86751263	MRPS11
16	2056003	2146515	rs7190284	rs258282	90513	16	0.0175439	0.0175439	0.45614	0.491228	Chr16:2038516..2078636	TSC2	Chr16:2078635..2125823	PKD1	Chr16:2125890..2194450	RFWD1	Chr16:2138198..2143346	RAB26
16	5394707	5407129	rs8047630	rs4786678	12423	9	0	0.0677966	0.932203	0.932203
16	8351107	8373895	rs2885092	rs723442	22789	12	0	0.0526316	0.877193	0.877193
16	14020270	14054991	rs8055701	rs9302512	34722	11	0.0185185	0.0925926	0.592593	0.611111
16	14284922	14297464	rs4780556	rs4781586	12543	6	0.0166667	0.216667	0.866667	0.866667	Chr16:14131635..14327069	MRTF-B
16	15983285	15986203	rs11864448	rs6498587	2919	3	0	0.277778	0.888889	0.888889
16	22326583	22337337	rs11864382	rs7184649	10755	5	0.0350877	0.298246	0.789474	0.824561	Chr16:22323815..22352955	CDR2
16	27340245	27341402	rs1805011	rs1805014	1158	6	0	0.0925926	0.759259	0.777778	Chr16:27291691..27342468	IL4R
16	30507169	30536776	rs7196129	rs3087437	29608	12	0	0.152542	0.254237	0.288136	Chr16:30520131..30570566	ITGAL
16	30556916	30643211	rs17790434	rs8051182	86296	22	0	0.0508475	0.220339	0.338983	Chr16:30520131..30570566	ITGAL	Chr16:30571385..30573970	FLJ23436	Chr16:30578839..30582254	MGC2474	Chr16:30582492..30583642	LOC388244	Chr16:30601145..30605644	MGC13138	Chr16:30617067..30619067	LOC146542	Chr16:30628054..30633070	FLJ32130
16	31323208	31368950	rs9936831	rs1143681	45743	14	0	0.169492	0.372881	0.423729	Chr16:31307371..31380250	ITGAM
16	47969205	48226046	rs8058886	rs9938490	256842	80	0	0.0740741	0.0185185	0.203704	Chr16:47978782..48056093	ABCC11	Chr16:48056171..48165369	LONP	Chr16:48172407..48175365	SIAH1
16	50921106	50936983	rs4238820	rs6500368	15878	10	0.0357143	0.0714286	0.642857	0.678571
16	65345722	65375489	rs11860315	rs4238835	29768	13	0	0.148148	0.481481	0.5	Chr16:65093539..65386522	LOC283867
16	66823712	66863318	rs8050375	rs11862512	39607	10	0.0172414	0.206897	0.87931	0.87931	Chr16:66839537..66911193	CBFB
16	66887285	66956408	rs8050312	rs7184692	69124	19	0.0172414	0.206897	0.844828	0.844828	Chr16:66839537..66911193	CBFB	Chr16:66920152..66958679	Lin10
16	66963448	67092471	rs13312735	rs11860295	129024	47	0.0175439	0.122807	0.561404	0.561404	Chr16:66964340..66970042	TRADD	Chr16:66970128..66974314	FBXL8	Chr16:66974953..66980083	HSF4	Chr16:66984107..66985863	NOL3	Chr16:66985744..67000316	LOC283849	Chr16:67002305..67008291	E2F4	Chr16:67009649..67014143	ELMO3	Chr16:67017279..67037147	FBXL9	Chr16:67037251..67039418	HSPC171	Chr16:67039531..67057568	FHOD1	Chr16:67059090..67082331	SLC9A5	Chr16:67088329..67099616	DKFZP434I216
16	67135053	67189144	rs4783754	rs9934738	54092	20	0.0172414	0.172414	0.637931	0.637931	Chr16:67136982..67195341	FLJ11004
16	67205832	67322731	rs7191318	rs8054468	116900	44	0.0169492	0.0847458	0.372881	0.372881	Chr16:67199949..67235260	CGI-38	Chr16:67204565..67226614	ZDHHC1	Chr16:67241273..67247693	HSD11B2	Chr16:67248162..67291325	ATP6V0D1	Chr16:67292711..67293953	AGRP
16	67331039	67358119	rs7191363	rs13334205	27081	8	0.0169492	0.135593	0.677966	0.677966	Chr16:67338991..67356925	FLJ13725
16	67473474	67632476	rs12103167	rs2008173	159003	35	0	0.105263	0.473684	0.491228	Chr16:67473086..67476864	DKFZP434A1319	Chr16:67476976..67478894	LOC388284	Chr16:67484675..67550246	MGC11335	Chr16:67533241..67616791	RANBP10	Chr16:67617213..67638203	TSNAXIP1
16	67641523	67681643	rs8052191	rs11553287	40121	13	0	0.157895	0.666667	0.684211	Chr16:67638298..67644036	FLJ13111	Chr16:67652449..67654334	THAP11	Chr16:67657055..67681455	NUTF2
16	71220723	71255929	rs10500555	rs12444083	35207	9	0	0.135593	0.40678	0.491525	Chr16:71240347..71243409	LOC390738
16	71277456	71283165	rs16973112	rs8044168	5710	5	0.0166667	0.283333	0.4	0.5
16	73406924	73422162	rs13335639	rs11864287	15239	6	0	0.178571	0.767857	0.785714
16	81784873	81808926	rs6564945	rs13333118	24054	6	0.0172414	0.137931	0.948276	0.948276
16	81812176	81844523	rs7194226	rs4291899	32348	16	0.0175439	0.105263	0.719298	0.719298	Chr16:81812432..81824731	HSPC105
16	84392008	84403175	rs2914827	rs1429264	11168	5	0	0.258621	0.241379	0.362069	Chr16:84378893..84431360	COTL1
16	87185499	87201754	rs889602	rs4843241	16256	9	0	0.186441	0.101695	0.440678	Chr16:87144424..87198845	MGC15419
16	87232789	87236865	rs13338940	rs7191969	4077	4	0.0166667	0.25	0.883333	0.883333	Chr16:87221345..87306947	BDG29
16	88838657	88859968	rs11865747	rs7198060	21312	9	0.0169492	0.0677966	0.576271	0.59322	Chr16:88827766..88858134	LOC390749	Chr16:88856726..88863519	LOC400557
16	88881756	88890520	rs9937042	rs11645629	8765	5	0.0344828	0.172414	0.655172	0.689655
17	3214975	3238284	rs7221439	rs7211241	23310	11	0.0357143	0.125	0.660714	0.660714	Chr17:3226312..3227259	OR1E3P	Chr17:3236495..3237436	OR1G1
17	3371096	3381524	rs9892511	rs2676541	10429	5	0.0175439	0.175439	0.245614	0.333333	Chr17:3375697..3376339	OR1D3P
17	3388987	3397821	rs743610	rs804239	8835	4	0.0175439	0.280702	0.263158	0.350877	Chr17:3387855..3496178	OR3A2
17	9185468	9213267	rs869019	rs2091317	27800	7	0.037037	0.203704	0.185185	0.277778	Chr17:9125425..9343919	NTN1
17	17061769	17073844	rs11486481	rs7224182	12076	6	0.0181818	0.254545	0.6	0.654545	Chr17:17042964..17075968	TNFRSF13B
17	17471684	17498512	rs7223820	rs7216582	26829	12	0	0.0727273	0.581818	0.581818	Chr17:17487235..17495744	LOC388344
17	29417948	29478946	rs2089464	rs12936085	60999	23	0	0.233333	0.466667	0.516667	Chr17:29394496..29431774	CENTA2	Chr17:29443519..29472490	RNF135
17	29481652	29521751	rs9900011	rs8075209	40100	8	0	0.266667	0.916667	0.916667	Chr17:29494491..29508235	LOC400590
17	31471086	31482530	rs28954	rs28903	11445	6	0.0363636	0.2	0.763636	0.763636
17	35510778	35517766	rs7218038	rs9913149	6989	5	0.0333333	0.133333	0.9	0.9	Chr17:35501797..35609721	AATF
17	37749609	37762233	rs1457818	rs4999757	12625	8	0.0333333	0.133333	0.516667	0.533333	Chr17:37741752..37756937	24b2/STAC2
17	49070072	49071443	rs3809767	rs7222327	1372	3	0.0181818	0.214286	0.781818	0.803571	Chr17:49060590..49083500	DKFZp434N1415
17	50936864	50984092	rs4794340	rs9900312	47229	13	0	0.178571	0.857143	0.857143
17	54906002	54960595	rs9902114	rs6505056	54594	23	0.0185185	0.148148	0.518519	0.592593	Chr17:54705474..55034645	FLJ38335
17	56442975	56490311	rs4793921	rs2585845	47337	20	0	0.0555556	0.12963	0.166667	Chr17:56414975..56455388	C14orf34
17	56491721	56523358	rs2586085	rs8067262	31638	12	0.0185185	0.037037	0.277778	0.296296
17	56560077	56621907	rs2233906	rs9916599	61831	23	0	0.0350877	0.263158	0.333333
17	58988661	59053664	rs7207456	rs8082431	65004	28	0	0.1	0.85	0.85	Chr17:58994941..59078001	APPBP2
17	59067586	59117222	rs7214631	rs1197060	49637	16	0	0.280702	0.912281	0.929825	Chr17:58994941..59078001	APPBP2	Chr17:59116328..59138402	LOC388406
17	59298988	59351987	rs7501675	rs8065282	53000	22	0	0.210526	0.859649	0.859649	Chr17:59229654..59944613	BCAS3
17	62144049	62245421	rs7218981	rs15637	101373	29	0.0178571	0.107143	0.321429	0.446429	Chr17:62151614..62159096	LOC51204	Chr17:62161500..62161917	LOC390806	Chr17:62173408..62245838	MAP3K3
17	62668676	62677931	rs7209842	rs11655020	9256	5	0	0.288136	0.762712	0.813559	Chr17:62582176..62680847	ERN1
17	62950866	62965348	rs6504227	rs9906276	14483	4	0	0.254237	0.59322	0.661017
17	63034865	63225829	rs6504231	rs4791275	190965	65	0.037037	0.0740741	0.277778	0.296296	Chr17:63024003..63047882	POLG2	Chr17:63045839..63052508	DDX5	Chr17:63053259..63084165	LOC90799	Chr17:63091584..63208287	SMURF2
17	63589963	63613513	rs1036891	rs1476171	23551	9	0.0357143	0.196429	0.589286	0.607143	Chr17:63556934..63618593	GNA13
17	63728373	63738126	rs4791227	rs8080929	9754	6	0.0185185	0.2	0.703704	0.727273	Chr17:63734923..63773908	RGS9
17	72811986	72826615	rs11658026	rs747742	14630	11	0	0.0862069	0.603448	0.655172	Chr17:72806840..72855278	TTYH2
17	72987031	72994259	rs8074723	rs7406641	7229	5	0.037037	0.148148	0.981481	1
17	78915221	78923936	rs8076241	rs8076666	8716	5	0.0178571	0.267857	0.446429	0.482143	Chr17:78894382..78927418	SLC26A11
17	80901861	80954066	rs7213159	rs3176829	52206	21	0.0350877	0.0701754	0.0526316	0.210526	Chr17:80881051..80910386	CSNK1D	Chr17:80951559..80954265	CD7
18	4371992	4379879	rs617841	rs556831	7888	4	0.0166667	0.25	0.9	0.9	Chr18:3976417..4445913	LOC388458
18	11047865	11064407	rs754969	rs8088643	16543	9	0.0363636	0.181818	0.272727	0.4
18	17132747	17345965	rs7233396	rs9950162	213219	29	0.0185185	0.0740741	0.407407	0.407407	Chr18:17074190..17340663	KIAA1772
18	18010651	18028770	rs9951435	rs9630787	18120	6	0.0181818	0.2	1.07273	1.07273	Chr18:18001403..18034214	GATA6
18	28654120	28750865	rs7228215	rs9961243	96746	61	0.0175439	0.0701754	1.03509	1.03509
18	30535026	30593885	rs12968725	rs4799778	58860	33	0.0357143	0.0892857	0.571429	0.571429	Chr18:30325268..30720076	DTNA
18	36623162	36668574	rs378249	rs4538091	45413	25	0.037037	0.185185	0.240741	0.351852
18	50044701	50047262	rs664157	rs3730662	2562	5	0.0178571	0.298246	0.553571	0.614035
18	52459348	52510824	rs1943017	rs637823	51477	52	0	0.0909091	0.781818	0.8	Chr18:52488734..52846008	WDR7
18	52512884	52538565	rs549825	rs11872907	25682	21	0	0.135593	0.728814	0.762712	Chr18:52488734..52846008	WDR7
18	52726926	52798484	rs8099201	rs1657414	71559	33	0	0.0535714	0.553571	0.553571	Chr18:52488734..52846008	WDR7
18	61614907	61649713	rs11874008	rs4941361	34807	30	0	0.0555556	0.5	0.555556	Chr18:61566457..61697144	CDH7
18	65195895	65199577	rs1354065	rs8089799	3683	3	0	0.290909	0.363636	0.436364
18	65201612	65204345	rs9955615	rs9965429	2734	2	0	0.290909	0.363636	0.436364
18	65720182	65729978	rs11877699	rs4891787	9797	5	0	0.214286	0.910714	0.910714	Chr18:65679161..65773129	CD226
18	65732400	65748485	rs3931957	rs3937015	16086	8	0.0166667	0.216667	0.933333	0.933333	Chr18:65679161..65773129	CD226
18	65752949	65774139	rs3934439	rs285217	21191	12	0.0166667	0.15	0.933333	0.933333	Chr18:65679161..65773129	CD226
18	65777625	65817986	rs11662781	rs7359745	40362	20	0.0166667	0.25	0.883333	0.883333
18	65839572	65936322	rs11151555	rs4891810	96751	56	0.0166667	0.133333	0.766667	0.783333	Chr18:65820009..66021933	RTTN
18	65938685	65993503	rs8095756	rs17082171	54819	23	0.0333333	0.2	0.75	0.766667	Chr18:65820009..66021933	RTTN
18	65996292	66020312	rs4891821	rs3911730	24021	16	0.0166667	0.133333	0.783333	0.8	Chr18:65820009..66021933	RTTN
18	71551753	71609129	rs7240284	rs8086908	57377	33	0.0178571	0.0535714	0.892857	0.892857
18	73378301	73378961	rs4890950	rs4131672	661	2	0.0181818	0.218182	0.290909	0.327273
19	1234615	1260647	rs2379240	rs8110307	26033	10	0	0.0545455	0.236364	0.290909	Chr19:1237168..1250944	EFNA2	Chr19:1251179..1252427	LOC388488	Chr19:1253013..1307365	LOC401895
19	1411998	1427432	rs7256954	rs2456163	15435	7	0.0169492	0.0508475	0.898305	0.898305	Chr19:1402288..1424237	APCL	Chr19:1424203..1430193	FLJ36666
19	3461903	3468442	rs8105925	rs12978249	6540	6	0.0344828	0.293103	0.775862	0.793103
19	4866938	4885481	rs2602707	rs2779176	18544	8	0.0363636	0.2	0.218182	0.272727	Chr19:4861814..4913165	UHRF1
19	11875627	11976226	rs8106238	rs279155	100600	24	0.0178571	0.125	0.482143	0.571429	Chr19:11875379..11887263	LOC388506	Chr19:11896900..11922588	DKFZp434I1610	Chr19:11936869..11952196	LOC284390
19	17643217	17669998	rs6512211	rs8101791	26782	11	0	0.157895	0.0526316	0.157895	Chr19:17575622..17651814	UNC13A
19	49937879	49984275	rs2927460	rs10401942	46397	18	0.0363636	0.0363636	0.727273	0.745455	Chr19:49943871..49955140	BCL3	Chr19:49972988..49995731	CBLC
19	56515006	56525816	rs8108239	rs3887787	10811	5	0.0181818	0.0909091	0.836364	0.836364	Chr19:56511526..56537190	LOC147645
19	59058493	59076916	rs16985211	rs307941	18424	5	0.0344828	0.241379	0.793103	0.793103	Chr19:59062949..59070607	MYADM
20	574657	583089	rs282152	rs282163	8433	6	0	0.224138	0	0.137931	Chr20:579854..585910	TCF15
20	1668807	1678479	rs202524	rs6111046	9673	5	0.0181818	0.236364	0.309091	0.363636	Chr20:1670806..1758254	LOC402009
20	4665664	4696706	rs6052768	rs2208629	31043	16	0.0185185	0.111111	0.240741	0.314815	Chr20:4662069..4677234	PRNP
20	4981033	5015237	rs2423086	rs373542	34205	11	0	0.0847458	0.338983	0.423729
20	6975635	6983986	rs6085820	rs6054666	8352	5	0	0.137931	0.706897	0.724138
20	17310191	17310962	rs2206454	rs6111511	772	3	0.0178571	0.142857	0.410714	0.482143	Chr20:17202631..17460223	PCSK2
20	24712867	24740174	rs2424641	rs6036903	27308	13	0	0.148148	0.351852	0.388889	Chr20:24739056..24889380	LOC391238
20	30816844	30835194	rs2233834	rs8182662	18351	6	0.0169492	0.288136	0.508475	0.525424	Chr20:30808105..30817708	REM	Chr20:30818581..30820377	LOC388794
20	30895279	31007159	rs6058110	rs6060627	111881	40	0	0.152542	0.322034	0.338983	Chr20:30847241..30902370	HM13	Chr20:30938092..30939313	ID1	Chr20:30970691..30977800	COX4I2	Chr20:30997261..31055656	BCL2L1
20	31010450	31034824	rs12479491	rs6088997	24375	10	0	0.183333	0.466667	0.516667	Chr20:30997261..31055656	BCL2L1
20	31155311	31180887	rs11908397	rs6060994	25577	12	0.0338983	0.288136	0.355932	0.40678	Chr20:31152384..31167492	MYLK2	Chr20:31177103..31178420	FKHL18
20	35925495	35970426	rs6028355	rs6513626	44932	14	0	0.12069	0.137931	0.189655	Chr20:35919596..35926389	C20orf24	Chr20:35926351..35959987	SLA2	Chr20:35965598..36059910	NDRG3
20	53868133	53901975	rs6512967	rs6014078	33843	15	0	0.05	0.433333	0.466667	Chr20:53777679..53953130	DOK5
20	53916914	53941667	rs6098118	rs2180462	24754	12	0	0.116667	0.266667	0.316667	Chr20:53777679..53953130	DOK5
20	54435753	54450272	rs2426550	rs6069141	14520	8	0	0.254237	1.01724	1
20	54572350	54585506	rs932439	rs8114036	13157	5	0.0333333	0.283333	0.766667	0.783333
20	54595926	54656285	rs211917	rs418100	60360	25	0.0166667	0.133333	0.766667	0.783333
20	54696804	54728319	rs6098585	rs6024121	31516	10	0.0333333	0.2	0.8	0.8
20	55045305	55055288	rs4494823	rs6024418	9984	7	0	0.181818	0.4	0.6
20	55908916	55921980	rs10439569	rs6014787	13065	5	0	0.192982	0.45614	0.491228
20	56664419	56673230	rs10485809	rs6092473	8812	6	0.0357143	0.125	0.589286	0.642857	Chr20:56651885..56669810	RNPC1
20	56901551	56915558	rs6092510	rs6070205	14008	5	0.0175439	0.105263	0.877193	0.877193	Chr20:56908873..56971962	TMEPAI
20	57412826	57450773	rs1541118	rs675636	37948	20	0.037037	0.12963	0.296296	0.37037	Chr20:57411379..57421607	LOC400848
20	59591482	59597631	rs6027519	rs6027527	6150	3	0.0166667	0.2	0.616667	0.616667
20	59638617	59653822	rs6027561	rs6015744	15206	8	0	0.203704	0.259259	0.314815
20	62885852	62899909	rs310644	rs310657	14058	5	0	0.280702	0.824561	0.824561	Chr20:62886114..62895055	PTK6	Chr20:62898511..62905205	SRMS
21	16302549	16313460	rs11911310	rs2178971	10912	5	0	0.220339	0.694915	0.694915
21	16463627	16483008	rs7283583	rs2823631	19382	11	0.0169492	0.0677966	0.79661	0.79661
21	16516169	16525943	rs171192	rs1689045	9775	6	0.0166667	0.233333	1	1	Chr21:16488570..16901360	LOC388815
21	16644659	16650487	rs8131732	rs240493	5829	6	0.0185185	0.127273	0.962963	0.945455	Chr21:16488570..16901360	LOC388815
21	16751235	16850425	rs8129337	rs2823880	99191	53	0	0.0555556	1.09259	1.09259	Chr21:16488570..16901360	LOC388815
21	21754634	21777009	rs2826849	rs2008833	22376	18	0.0178571	0.107143	0.178571	0.339286	Chr21:21292504..21833085	NCAM2
21	23146729	23168563	rs8131882	rs928849	21835	12	0	0.0833333	1	1
21	24170072	24196787	rs915622	rs2828586	26716	15	0	0.127273	0.872727	0.872727
21	24240731	24247580	rs6516595	rs2828649	6850	8	0.0178571	0.0535714	0.660714	0.696429
21	35286616	35302730	rs7281724	rs932284	16115	11	0.0338983	0.101695	0.389831	0.40678	Chr21:35080501..35342037	RUNX1
21	41491097	41497922	rs2837966	rs10483074	6826	6	0	0.259259	0.240741	0.314815	Chr21:41460124..41568920	BACE2
21	41502583	41507534	rs914178	rs6517658	4952	5	0	0.181818	0.418182	0.454545	Chr21:41460124..41568920	BACE2
22	21616165	21689141	rs5996424	rs4300938	72977	27	0.0350877	0.0526316	0.22807	0.263158
22	31997679	32015001	rs1046166	rs5754509	17323	8	0	0.218182	0.745455	0.745455	Chr22:31993625..32640964	LARGE
22	34873996	34881745	rs7364143	rs6000199	7750	6	0	0.236364	0.12963	0.290909
22	34887948	34897724	rs1315	rs9622356	9777	11	0.0185185	0.254545	0.611111	0.690909	Chr22:34894068..34907813	APOL2
22	35247210	35251967	rs5756259	rs738977	4758	4	0.0175439	0.192982	0.596491	0.701754	Chr22:35203143..35341942	CACNG2
22	38003922	38018086	rs739363	rs5757647	14165	10	0.0178571	0.0714286	0.142857	0.303571	Chr22:37988993..38024619	SYNGR1
22	38200779	38215201	rs9607658	rs3788556	14423	4	0.0338983	0.169492	0.169492	0.338983	Chr22:38209797..38325767	CACNA1I
22	38297467	38320527	rs136848	rs9607667	23061	13	0.037037	0.185185	0.0555556	0.240741	Chr22:38209797..38325767	CACNA1I
22	38677796	38698417	rs6001728	rs9611257	20622	8	0	0.267857	0.625	0.678571	Chr22:38683494..38764905	LOC388903
22	38706587	38730365	rs6519215	rs6001754	23779	11	0	0.25	0.625	0.678571	Chr22:38683494..38764905	LOC388903
22	40590883	40613278	rs2187959	rs12166497	22396	6	0	0.111111	0.481481	0.518519	Chr22:40591341..40597974	LOC339674
22	41774895	41787863	rs138903	rs113515	12969	10	0.0175439	0.0877193	0.0350877	0.298246	Chr22:41778494..41790189	BZRP
22	44834625	44868487	rs4253760	rs7291444	33863	19	0	0.222222	0.388889	0.388889	Chr22:44760028..44843750	PPARA	Chr22:44845786..44849458	MGC2452	Chr22:44852159..44858441	LOC150383	Chr22:44863801..44871460	PKDREJ
22	44934641	44985833	rs140054	rs9615969	51193	26	0	0.148148	0.425926	0.444444	Chr22:44905549..44938948	GTSE1	Chr22:44943852..44965475	FLJ10140	Chr22:44968972..45145308	CELSR1
22	44988326	45030087	rs760980	rs9627453	41762	21	0	0.037037	0.333333	0.351852	Chr22:44968972..45145308	CELSR1
22	45795752	45807039	rs6008067	rs9626699	11288	5	0	0.103448	0.965517	0.965517

## Sheet: EASvsCEU
Chr	First_pos	Last_pos	First_rs	Last_rs	Length	SNP	rMHH(YRI/EAS)	rHH(YRI/EAS)	rMHH(CEU/EAS)	rHH(CEU/EAS)	Genes
2	9715614	9721513	rs6432017	rs13426930	5900	5	0	0.232143	0.0357143	0.214286	Chr2:9651152..9717637	ADAM17
2	17621029	17621271	rs6732500	rs951376	243	2	0.516667	0.533333	0.0333333	0.283333
2	17627836	17633862	rs11687048	rs1519558	6027	4	0.133333	0.15	0.0333333	0.25
2	17642033	17647339	rs700422	rs17380058	5307	4	0.2	0.216667	0.0333333	0.283333
2	17976370	17993081	rs1564010	rs7592567	16712	9	0.118644	0.186441	0.0338983	0.288136	Chr2:17982299..17982880	LOC343930
2	22298089	22450516	rs396757	rs10196529	152428	51	0	0	0.0357143	0.125
2	35581613	35584650	rs4577259	rs7590663	3038	2	0.481481	0.555556	0.037037	0.296296
2	108563662	108564889	rs6542764	rs1983394	1228	2	0.736842	0.754386	0.0350877	0.245614	Chr2:108551742..108615857	LOC391419
3	108730961	108776136	rs2047170	rs1021502	45176	16	0	0.418182	0.0181818	0.163636	Chr3:108562691..108845606	BBX
3	109500630	109516307	rs3996020	rs3996003	15678	7	0.283333	0.316667	0.0166667	0.183333	Chr3:109420117..109569070	KIAA1000
3	109785098	109809322	rs9815057	rs9858569	24225	12	0.155172	0.258621	0.0172414	0.12069	Chr3:109794714..109797031	RETNLB
4	36792161	36814135	rs6531489	rs6531493	21975	11	0	0.275862	0.0344828	0.275862
4	135446245	135488973	rs1603166	rs1982905	42729	17	0.309091	0.327273	0.0181818	0.218182
4	135522443	135632987	rs1494982	rs7685793	110545	53	0.12069	0.155172	0	0.206897	Chr4:135576309..135580995	LOC132430
5	105330521	105350268	rs1014813	rs12516197	19748	9	0.192982	0.403509	0.0350877	0.175439
5	117480167	117642506	rs7703873	rs1479211	162340	77	0	0.0909091	0	0.0727273
6	69938104	69965735	rs701655	rs7757740	27632	14	0.0892857	0.214286	0.0357143	0.107143	Chr6:69343035..70094997	BAI3
6	100307973	100327281	rs6916883	rs4640896	19309	7	0.037037	0.148148	0.0185185	0.185185
6	126422953	126469896	rs11963634	rs9375427	46944	16	0.0185185	0.0925926	0.037037	0.166667
7	27362687	27381881	rs1524529	rs1015265	19195	10	0.303571	0.428571	0	0.25	Chr7:27307333..27444874	HIBADH
7	71297184	71312727	rs2909981	rs7796874	15544	6	0.5	0.555556	0	0.296296	Chr7:71106411..71365707	LOC402540
8	82099819	82206515	rs7833919	rs9298347	106697	44	0	0.0727273	0.037037	0.145455	Chr8:82096121..82194159	LOC392238
8	139024425	139054833	rs6986279	rs6577869	30409	16	0.0185185	0.037037	0.037037	0.111111	Chr8:138792743..139066844	LOC401478
9	27132347	27142292	rs7875598	rs4601425	9946	9	0.203704	0.240741	0.037037	0.259259	Chr9:27099441..27220165	TEK
10	91595508	91600824	rs1329180	rs3918657	5317	4	0.839286	0.857143	0.0178571	0.285714
10	91695196	91743274	rs10509597	rs2104483	48079	24	0	0.2	0.0181818	0.218182
11	1092644	1101984	rs6421972	rs4077757	9341	5	0.0555556	0.185185	0.0185185	0.277778	Chr11:1071052..1100566	LOC387740
11	78652812	78665474	rs10501436	rs616214	12663	8	0.142857	0.267857	0	0.142857	Chr11:78653160..78878300	LOC387795
11	100527165	100581920	rs493957	rs471811	54756	23	0.0714286	0.160714	0.0178571	0.178571	Chr11:100446820..100538972	PGR
11	100590528	100605335	rs606386	rs1942835	14808	9	0.327273	0.363636	0.0363636	0.254545
11	100633741	100635837	rs1943752	rs2156520	2097	4	0.309091	0.454545	0.0363636	0.254545
14	67459684	67481124	rs242099	rs1275207	21441	7	0.272727	0.345455	0.0363636	0.163636	Chr14:67479900..67480103	RPS29P1
14	92416120	92447088	rs3762139	rs1950351	30969	12	0.0892857	0.142857	0.0357143	0.160714
16	47969205	48226046	rs8058886	rs9938490	256842	80	0	0.0740741	0.0185185	0.203704	Chr16:47978782..48056093	ABCC11	Chr16:48056171..48165369	LONP	Chr16:48172407..48175365	SIAH1
17	70980041	70993159	rs11077603	rs7219608	13119	9	0.166667	0.222222	0.037037	0.166667
18	36270338	36280152	rs4459621	rs977143	9815	12	0.2	0.309091	0.0181818	0.272727
20	574657	583089	rs282152	rs282163	8433	6	0	0.224138	0	0.137931	Chr20:579854..585910	TCF15
22	38095389	38117353	rs1557542	rs2899319	21965	9	0.109091	0.181818	0	0.127273	Chr22:38096364..38128478	MGAT3
22	41774895	41787863	rs138903	rs113515	12969	10	0.0175439	0.0877193	0.0350877	0.298246	Chr22:41778494..41790189	BZRP

## Sheet: CEUvsYRI
Chr	First_pos	Last_pos	First_rs	Last_rs	Length	SNP	rMHH(YRI/CEU)	rHH(YRI/CEU)	rMHH(EAS/CEU)	rHH(EAS/CEU)	Genes
1	1123116	1166818	rs3753340	rs307347	43703	10	0	0.148148	0.111111	0.407407	Chr1:1123634..1133467	SCNN1D	Chr1:1135002..1144698	CENTB5	Chr1:1150052..1153115	FLJ90811	Chr1:1153037..1166108	FLJ20542
1	1403171	1422294	rs9439440	rs1106226	19124	8	0.0363636	0.2	0.454545	0.490909	Chr1:1387336..1421469	FLJ10709	Chr1:1422141..1427544	LOC339453
1	10760005	10767576	rs7547006	rs11121673	7572	5	0	0.125	0.375	0.589286	Chr1:10734729..10761400	LOC390996
1	27594513	27660834	rs2808431	rs2179104	66322	30	0	0.0545455	0	0.672727	Chr1:27597265..27603396	G1P3	Chr1:27617790..27618639	LOC339409	Chr1:27657178..27692803	MGC34648
1	34865514	34897023	rs4269739	rs7529201	31510	17	0	0.111111	0.388889	0.5	Chr1:34867619..34878576	MGC14276	Chr1:34877054..34924953	ZNF258	Chr1:34880243..34881074	LOC388618
1	34911069	34931340	rs7514265	rs6702231	20272	10	0	0.218182	0.4	0.545455	Chr1:34877054..34924953	ZNF258
1	34937703	34972164	rs12059326	rs11264015	34462	8	0.0185185	0.259259	0.37037	0.518519
1	35095324	35097478	rs7542630	rs4653124	2155	3	0.0363636	0.254545	0.236364	0.454545
1	50016530	50034537	rs3119167	rs11205687	18008	7	0.0344828	0.103448	1.03448	1.03448	Chr1:49944555..50036978	ELAVL4
1	61564717	61576484	rs1286633	rs1290441	11768	4	0.0333333	0.1	1	1
1	87462128	87476980	rs902295	rs6576909	14853	6	0.0363636	0.127273	0.345455	0.418182
1	116220194	116223565	rs6428892	rs7519319	3372	4	0	0.175439	1.03571	1.01754
1	116279753	116291542	rs12130872	rs1998447	11790	7	0	0.181818	1.01818	1.01818	Chr1:116262263..116293777	ATP1A1
1	116299168	116318994	rs1885802	rs10924089	19827	10	0	0.218182	1.01818	1.01818	Chr1:116312727..116367855	LOC148766
1	116322235	116342808	rs7550944	rs12067788	20574	9	0.0363636	0.272727	1	1	Chr1:116312727..116367855	LOC148766
1	116760742	116778989	rs7542138	rs2806882	18248	8	0.0350877	0.0350877	1.03509	1.03509
1	116788352	116821337	rs2491120	rs2998184	32986	18	0.0181818	0.0909091	0.763636	0.781818	Chr1:116799070..116879353	PTGFRN
1	145521623	145553280	rs2999614	rs5006452	31658	4	0.0185185	0.277778	0.648148	0.666667	Chr1:145532974..145629782	LOC388685
1	156637099	156653436	rs11265198	rs6413897	16338	3	0.0333333	0.266667	1	1
1	183115055	183131772	rs1951513	rs6425011	16718	10	0	0.0517241	1.01724	1.01724	Chr1:182943064..183399071	FIBL-6
1	189721234	189748803	rs6692655	rs1175055	27570	10	0.0350877	0.210526	0.631579	0.649123
1	226949163	226973527	rs7513423	rs12070887	24365	12	0	0.183333	0.983333	0.983333
1	227001824	227012268	rs9651173	rs6685413	10445	6	0.0169492	0.20339	1.01695	1.01695
1	227107514	227118571	rs11122477	rs11589793	11058	7	0.0178571	0.140351	0.946429	0.929825
1	227120855	227142340	rs11589603	rs6701451	21486	10	0.0178571	0.105263	0.946429	0.929825
1	227148417	227166685	rs16850658	rs4550054	18269	9	0.0357143	0.157895	0.767857	0.754386
1	235782414	235787234	rs510638	rs606586	4821	4	0.0338983	0.152542	0.762712	0.762712	Chr1:235695995..236064688	LOC391179
1	246001526	246023985	rs12088332	rs4926502	22460	9	0	0.12963	0.796296	0.796296	Chr1:246015288..246028193	PGBD2
2	5547541	5553195	rs7599669	rs792105	5655	6	0.0357143	0.0877193	0.857143	0.859649
2	6275143	6287689	rs16864756	rs1918049	12547	7	0.037037	0.203704	0.537037	0.722222
2	13568254	13582797	rs167485	rs1835397	14544	7	0.0185185	0.259259	0	0.648148
2	21816556	21847979	rs2005912	rs6719475	31424	18	0.0185185	0.12963	0.814815	0.814815
2	39583223	39589498	rs10199948	rs7588265	6276	4	0.0175439	0.210526	0.824561	0.824561	Chr2:39450957..39638754	MAP4K3
2	39624325	39659627	rs7371619	rs6725704	35303	15	0.0185185	0.185185	0.87037	0.87037	Chr2:39450957..39638754	MAP4K3
2	39667295	39686536	rs1880705	rs2287090	19242	6	0.0333333	0.166667	0.983333	0.983333
2	40089254	40099877	rs2058633	rs4670984	10624	9	0.0178571	0.232143	0.946429	0.946429
2	69210643	69213917	rs4591375	rs7577132	3275	5	0.0185185	0.277778	0.185185	0.425926
2	69236691	69237478	rs4372940	rs7558776	788	3	0.0350877	0.298246	0.122807	0.263158	Chr2:69215023..69450836	ANTXR1
2	73145268	73169348	rs755409	rs6728989	24081	6	0	0.0925926	1.01852	1.01852	Chr2:73143704..73273503	SFXN5
2	74481179	74506121	rs11883995	rs3771737	24943	13	0.0175439	0.175439	0.403509	0.578947	Chr2:74423099..74544200	SLC4A5
2	77468507	77491380	rs6729161	rs12105416	22874	12	0.0175439	0.157895	0.77193	0.842105
2	108008994	108023667	rs6712808	rs328036	14674	11	0.0181818	0.163636	0	0.690909
2	110195795	110593099	rs951954	rs10190967	397305	8	0	0.12963	0.666667	0.666667	Chr2:110231003..110245859	LOC402098	Chr2:110286625..110351552	RANBP2L1	Chr2:110351898..110354073	LOC400994	Chr2:110392559..110400323	LIMS3	Chr2:110477935..110478954	GPAA1P1	Chr2:110480930..110489994	LOC400995	Chr2:110488505..110504652	LOC343938	Chr2:110577737..110609938	BENE
2	121766837	121827180	rs7559164	rs280200	60344	34	0.0350877	0.105263	1	1	Chr2:121645004..121844101	GLI2
2	123359891	123383084	rs1527239	rs11122912	23194	16	0.0357143	0.107143	1.07143	1.07143
2	130252746	130255846	rs6760375	rs1453152	3101	2	0	0.293103	0.551724	0.586207	Chr2:130211007..130347612	LOC402102
2	132815324	132834963	rs6723541	rs7608784	19640	8	0.0181818	0.2	0.727273	0.727273
2	163445652	163537500	rs6708255	rs13419024	91849	37	0.0185185	0.185185	0.833333	0.833333	Chr2:163430461..163897784	KCNH7
2	163542177	163558938	rs985621	rs7587993	16762	8	0.0357143	0.25	0.678571	0.678571	Chr2:163430461..163897784	KCNH7
2	163810689	163820931	rs6753049	rs305680	10243	7	0	0.0740741	0.0555556	0.259259	Chr2:163430461..163897784	KCNH7
2	164427813	164454526	rs1037959	rs4144826	26714	9	0	0.148148	0.0925926	0.203704
2	168719539	168737581	rs731922	rs6433005	18043	11	0.0175439	0.0877193	0.473684	0.526316
2	192434128	192518581	rs6741861	rs7560131	84454	54	0.0363636	0.0727273	0.6	0.654545	Chr2:192312797..192492430	MYO1B
2	199467056	199475290	rs6751243	rs10184637	8235	6	0.0338983	0.237288	0.898305	0.898305
2	206494878	206515843	rs6435283	rs7562729	20966	10	0.037037	0.203704	1.09259	1.09259	Chr2:205613266..206683080	ALS2CR19
2	206518124	206546409	rs880344	rs7573626	28286	11	0.0185185	0.166667	1.05556	1.05556	Chr2:205613266..206683080	ALS2CR19
2	206956189	206972590	rs6720597	rs6435316	16402	11	0	0.107143	1.07143	1.07143
2	219893930	219900543	rs1000936	rs6731254	6614	5	0	0.183333	1	1	Chr2:219889646..219899053	PRKAG3
2	220081295	220091454	rs9967806	rs9653262	10160	4	0.0181818	0.236364	0.927273	0.927273	Chr2:220070115..220095022	DKFZp434O0527
2	222761914	222833257	rs825281	rs4674606	71344	37	0	0.0545455	0.509091	0.545455
2	222839367	222843556	rs11893149	rs4674608	4190	3	0.0350877	0.263158	0.526316	0.561404
2	222847740	222875900	rs7597883	rs12104447	28161	16	0	0.178571	0.517857	0.517857
2	231879282	231880952	rs3792067	rs3792064	1671	3	0.0185185	0.240741	0.833333	0.87037	Chr2:231780204..231888326	MO25
2	237492684	237515568	rs6431449	rs7597596	22885	11	0	0.145455	0.472727	0.527273
2	237689315	237695456	rs3761713	rs4281859	6142	6	0	0.0892857	0.678571	0.714286	Chr2:237519544..237702842	FLJ22527
3	4641879	4657019	rs6810292	rs4074088	15141	8	0.0181818	0.2	0.236364	0.363636	Chr3:4486975..4864081	ITPR1
3	5743262	5760451	rs6782143	rs7632506	17190	7	0.0178571	0.232143	0.696429	0.732143
3	42361196	42374073	rs39646	rs33479	12878	6	0	0.0892857	0.875	0.875
3	51756713	51836440	rs9811884	rs7632944	79728	25	0.0338983	0.0847458	0.440678	0.542373	Chr3:51810668..51823920	LOC401067
3	66447707	66492800	rs10510956	rs1523293	45094	22	0	0.0545455	0.654545	0.672727	Chr3:66362291..66484421	LRIG1
3	69125316	69179483	rs4621333	rs6549187	54168	24	0	0.0357143	0.446429	0.464286	Chr3:69152489..69387999	GRSP1
3	70996878	71028527	rs11926076	rs7621612	31650	12	0.0172414	0.241379	0.775862	0.793103	Chr3:70926769..71513085	FOXP1
3	79133787	79175672	rs7611697	rs6782878	41886	11	0.0185185	0.277778	1.11111	1.11111	Chr3:78567291..79559962	ROBO1
3	97599818	97651474	rs692186	rs1565134	51657	17	0.0363636	0.163636	0.654545	0.709091	Chr3:97606063..97606840	LOC391556
3	98259895	98356697	rs6782836	rs4857057	96803	37	0	0.0350877	0.754386	0.754386	Chr3:97854331..98284445	LOC203806
3	98431177	98500835	rs6439152	rs9826983	69659	28	0.0172414	0.0689655	0.965517	0.965517	Chr3:98479391..98688322	DKFZp434C1418
3	111328106	111364668	rs11914712	rs2399322	36563	19	0.037037	0.296296	0.351852	0.444444
3	112220224	112244494	rs6437956	rs10934077	24271	6	0.0181818	0.272727	0.290909	0.527273
3	113505828	113522276	rs2171513	rs1386895	16449	7	0	0.277778	0.574074	0.611111	Chr3:113505856..113539106	BTLA
3	124671345	124701172	rs6792703	rs42765	29828	13	0	0.145455	0.0545455	0.363636	Chr3:124653777..124871412	MYLK
3	124786698	124831836	rs1982509	rs7639329	45139	13	0.0185185	0.0555556	0.814815	0.814815	Chr3:124653777..124871412	MYLK
3	130553042	130579440	rs9845069	rs1905442	26399	10	0	0.0877193	0.196429	0.333333	Chr3:130479877..130560100	WDR10	Chr3:130568391..130575096	RHO
3	144864675	144873670	rs6804065	rs6440195	8996	8	0.0185185	0.185185	0.925926	0.925926	Chr3:144304973..144888198	SLC9A9
3	144892983	144925520	rs1979911	rs10513230	32538	22	0.0185185	0.0925926	0.962963	0.962963	Chr3:144895490..144921889	LOC257039
3	145732649	145767633	rs6806335	rs12632901	34985	7	0	0.296296	0.351852	0.407407
3	154157146	154180181	rs6802016	rs7618500	23036	12	0	0.185185	0.462963	0.462963
3	170307993	170318371	rs6790035	rs3898488	10379	5	0	0.267857	0.303571	0.482143	Chr3:170187799..170702387	MDS1
3	181421233	181438954	rs1520616	rs6443695	17722	10	0.0178571	0.178571	1.07143	1.07143
3	183140417	183199345	rs6808820	rs11920413	58929	21	0.0175439	0.105263	0.77193	0.77193
3	183490119	183513375	rs9851315	rs6790643	23257	8	0.0338983	0.20339	0.949153	0.949153	Chr3:183485671..183529140	LOC401103
3	189969758	189987256	rs1355561	rs9859888	17499	10	0	0.0555556	0.703704	0.703704	Chr3:189985916..190362183	FLJ41238
3	189991958	189996717	rs9868347	rs7648543	4760	7	0.0172414	0.155172	0.724138	0.741379	Chr3:189985916..190362183	FLJ41238
3	190010527	190017531	rs710489	rs710494	7005	7	0	0.263158	0.666667	0.666667	Chr3:189985916..190362183	FLJ41238
3	190035904	190115591	rs848986	rs6766430	79688	27	0	0	0.666667	0.666667	Chr3:189985916..190362183	FLJ41238
3	195503900	195522280	rs6798801	rs6778291	18381	6	0.0181818	0.127273	0.545455	0.563636
4	12187195	12194946	rs4569774	rs6448893	7752	7	0.0172414	0.275862	0.982759	0.982759
4	26285842	26322892	rs6838762	rs6838102	37051	21	0.0333333	0.1	0.916667	0.933333
4	33065621	33094296	rs10517268	rs6531430	28676	14	0.0357143	0.107143	0.767857	0.767857
4	43280504	43283474	rs974556	rs10517076	2971	4	0.0363636	0.236364	0.290909	0.4
4	52994788	53039066	rs11133416	rs900209	44279	23	0	0.101695	1.01695	1.01695
4	55970806	55987409	rs11727226	rs12505136	16604	8	0.0363636	0.236364	0.709091	0.727273
4	71959722	71972371	rs2553324	rs2609426	12650	8	0.0357143	0.214286	1.05357	1.05357	Chr4:71960712..71978787	ENAM
4	71975120	71987363	rs2609428	rs2288243	12244	9	0.0357143	0.178571	0.928571	0.928571	Chr4:71960712..71978787	ENAM
4	74997004	75056723	rs942053	rs6818711	59720	31	0	0.0545455	0.527273	0.6
4	75155953	75180198	rs6811788	rs6833907	24246	13	0.0181818	0.214286	0.963636	0.946429	Chr4:75168664..75170728	CXCL6
4	75481884	75523347	rs476893	rs479409	41464	23	0.0185185	0.12963	0.796296	0.796296	Chr4:75488484..75490324	FLJ13105
4	77218843	77232286	rs6831559	rs6853750	13444	7	0.0363636	0.0727273	0.836364	0.854545
4	77248966	77267714	rs9998204	rs7691712	18749	10	0.0166667	0.0333333	1	1	Chr4:77239420..77282076	PPEF2
4	80151948	80202667	rs12641797	rs17003457	50720	22	0.0350877	0.0877193	0.298246	0.368421	Chr4:80145338..80155312	LOC402179	Chr4:80155927..80291736	BMP2K
4	80219088	80237039	rs10022801	rs17003472	17952	9	0.0169492	0.186441	0.525424	0.559322	Chr4:80155927..80291736	BMP2K
4	80258475	80294715	rs10518205	rs2291181	36241	19	0.0338983	0.0847458	0.508475	0.542373	Chr4:80155927..80291736	BMP2K
4	86484363	86494911	rs4693111	rs10516740	10549	5	0	0.267857	1.07143	1.07143
4	98792312	98811312	rs17026725	rs11933153	19001	4	0.0175439	0.298246	0.842105	0.877193
4	98849913	98859686	rs10021842	rs11947563	9774	3	0.0175439	0.22807	0.824561	0.877193
4	142301069	142333517	rs6840815	rs1872861	32449	11	0	0.290909	0.945455	0.945455
4	149362278	149402358	rs731989	rs1369958	40081	20	0	0.12963	0.462963	0.537037
4	149434387	149448038	rs6820696	rs2635265	13652	8	0	0.210526	0.491228	0.649123	Chr4:149445017..149571554	FLJ20896
4	152385368	152479060	rs1296465	rs2081606	93693	28	0	0.111111	0.592593	0.62963	Chr4:151763438..152514276	LRBA
4	152482684	152502284	rs17027226	rs11099781	19601	4	0	0.240741	0.611111	0.666667	Chr4:151763438..152514276	LRBA
4	166094948	166122464	rs1919319	rs13107071	27517	15	0.037037	0.148148	0.685185	0.703704
4	177056073	177075015	rs6839152	rs7674119	18943	7	0	0.148148	0.981481	0.981481
4	177098100	177178710	rs4690660	rs6825610	80611	40	0	0.0357143	0.857143	0.857143	Chr4:177112074..177113465	LOC391718
5	11482520	11484683	rs31899	rs31815	2164	4	0.0185185	0.203704	0.925926	0.925926	Chr5:11024690..11956848	CTNND2
5	11795172	11894929	rs10474933	rs2100676	99758	52	0	0.0175439	0.421053	0.473684	Chr5:11024690..11956848	CTNND2
5	33991644	34012646	rs35406	rs35412	21003	17	0.0338983	0.118644	0	0.220339	Chr5:33990229..34030250	MATP
5	36294253	36307818	rs7722251	rs2362978	13566	10	0	0.288136	0.101695	0.288136	Chr5:36291176..36347505	FLJ25422
5	38713659	38736036	rs748305	rs2471157	22378	16	0.0178571	0.0714286	0.785714	0.785714
5	76269290	76313275	rs6898000	rs1154954	43986	7	0.0333333	0.283333	0.5	0.516667
5	89661197	89671324	rs2916616	rs1560919	10128	7	0	0.166667	1.07407	1.07407
5	90181386	90218979	rs1983366	rs2438383	37594	15	0.0185185	0.166667	0.555556	0.648148	Chr5:89938690..90544106	MASS1
5	101012088	101031287	rs3912797	rs900106	19200	14	0	0.0862069	0.948276	0.948276
5	101037983	101055207	rs6859110	rs2061860	17225	9	0	0.293103	0.948276	0.948276
5	132676103	132683614	rs11949143	rs1991467	7512	6	0.0350877	0.22807	0.947368	0.964912	Chr5:132608368..133024471	KIAA1061
5	147678078	147709777	rs2304030	rs11958437	31700	14	0.0172414	0.0344828	0.310345	0.310345	Chr5:147676253..147694327	LOC153218
5	150081792	150092228	rs6881611	rs6868914	10437	5	0.0181818	0.285714	0.6	0.625	Chr5:150068954..150087435	MYOZ3
5	150117280	150195628	rs10515642	rs1529476	78349	22	0.0181818	0.125	0.545455	0.589286	Chr5:150116819..150167086	DCTN4	Chr5:150186377..150204808	NID67
5	175122169	175144496	rs11748579	rs7733927	22328	12	0	0.0555556	1.01852	1.01852
5	176228913	176239651	rs1567319	rs893153	10739	9	0	0.272727	0.854545	0.872727
5	176244072	176250758	rs488083	rs2118174	6687	7	0.0178571	0.232143	0.857143	0.875
5	180787341	180795267	rs2770968	rs6861389	7927	4	0	0.109091	0.6	0.654545	Chr5:180792382..180794249	FLJ23053	Chr5:180793035..180797781	TRIM52
6	3060525	3082635	rs3734483	rs2231367	22111	14	0.0350877	0.0526316	0.894737	0.894737	Chr6:3064041..3098288	BPHL
6	3121525	3145961	rs11961265	rs9503448	24437	12	0.0344828	0.103448	0.655172	0.672414
6	3156614	3190851	rs4296931	rs9501957	34238	19	0.0181818	0.0363636	1.01818	1.01818	Chr6:3169729..3172967	MGC8685
6	10799959	10830559	rs12665162	rs12663432	30601	12	0.0166667	0.15	0.95	0.95	Chr6:10779639..10802764	LOC389366	Chr6:10803176..10817958	PAK1IP1
6	13569342	13574670	rs6900571	rs2841556	5329	5	0.0166667	0.216667	0.916667	0.916667	Chr6:13471798..13595766	GFOD1
6	14781934	14788086	rs857405	rs857455	6153	5	0.0169492	0.20339	1.01695	1.01695
6	30771161	30786763	rs7773711	rs2075015	15603	10	0.0181818	0.0545455	0.527273	0.563636	Chr6:30773756..30791821	MDC1
6	37363880	37374854	rs195398	rs195418	10975	4	0	0.118644	0.59322	0.59322	Chr6:37368646..37409369	RNF8
6	37441728	37446424	rs2173314	rs6925640	4697	4	0.0185185	0.148148	0.740741	0.740741
6	43661669	43669780	rs3957257	rs11967462	8112	3	0	0.240741	0.925926	0.944444	Chr6:43635088..43679471	GTPBP2	Chr6:43659665..43685599	C6orf206
6	56554325	56592728	rs1024196	rs6927032	38404	18	0.0185185	0.111111	1.01852	1.01852	Chr6:56369630..56755299	BPAG1
6	84531224	84585265	rs6913491	rs9353146	54042	21	0	0.185185	0.666667	0.703704	Chr6:84558581..84562829	C6orf159	Chr6:84565001..84665551	NCB5OR
6	84735992	84744619	rs2480181	rs11970690	8628	5	0.0181818	0.290909	1.09091	1.09091	Chr6:84739016..84796195	C6orf117
6	84849334	84870436	rs9444141	rs9294292	21103	12	0.037037	0.166667	0.944444	0.944444	Chr6:84829568..84932910	C6orf84
6	91752059	91765205	rs9362810	rs9444824	13147	5	0.0181818	0.218182	0.927273	0.945455
6	132559445	132595064	rs6916284	rs9483433	35620	22	0	0.0740741	0.759259	0.796296
6	135584455	135597202	rs12526039	rs2142956	12748	7	0	0.185185	0.851852	0.851852	Chr6:135585694..135799453	AHI1
6	136487300	136515987	rs6913492	rs936630	28688	16	0	0.163636	0.363636	0.454545	Chr6:136153420..136497186	PDE7B
6	136523559	136549486	rs6570073	rs1040753	25928	16	0	0.0363636	0.454545	0.490909	Chr6:136532738..136552019	DUFD1
6	143367148	143413284	rs1413625	rs6570548	46137	25	0	0.148148	0.407407	0.5	Chr6:143362593..143642011	AIG1
6	146499961	146503524	rs2328729	rs4895691	3564	2	0.0357143	0.267857	0.803571	0.821429	Chr6:146330989..146739304	GRM1
6	146508301	146540873	rs7750018	rs9497500	32573	18	0.0178571	0.196429	0.839286	0.857143	Chr6:146330989..146739304	GRM1
6	146546264	146582323	rs9497505	rs7750079	36060	22	0.0178571	0.160714	0.839286	0.857143	Chr6:146330989..146739304	GRM1
6	146589918	146592741	rs1156185	rs6921530	2824	4	0.0178571	0.232143	0.839286	0.857143	Chr6:146330989..146739304	GRM1
6	146596842	146599918	rs7769450	rs4895695	3077	3	0.0178571	0.232143	0.839286	0.857143	Chr6:146330989..146739304	GRM1
6	146618079	146636944	rs4895696	rs362983	18866	5	0	0.232143	0.839286	0.857143	Chr6:146330989..146739304	GRM1
6	156764309	156774453	rs881957	rs6932960	10145	3	0.0185185	0.277778	0.0740741	0.444444
7	11210951	11218870	rs1468247	rs7796362	7920	6	0.0338983	0.20339	0.169492	0.322034	Chr7:11085065..11214812	PHF14	Chr7:11158599..11420908	KIAA0960
7	15528011	15541576	rs37415	rs6945609	13566	8	0	0.0925926	0.555556	0.611111	Chr7:15416183..15673582	LOC392636
7	18811011	18874304	rs2214627	rs10228000	63294	18	0.0181818	0.0545455	1.09091	1.09091	Chr7:18607934..19107995	HDAC9
7	27868349	27878084	rs6963763	rs11975130	9736	7	0.0363636	0.0727273	0.490909	0.545455	Chr7:27595217..27962497	JAZF1
7	29989286	30036043	rs6952286	rs957991	46758	23	0.0185185	0.0555556	1.05556	1.05556
7	30041917	30109493	rs6462197	rs12056300	67577	18	0.0181818	0.0909091	0.872727	0.872727	Chr7:30062251..30131906	SCRN1	Chr7:30066195..30149580	LOC223082
7	30131678	30169043	rs7786134	rs7806344	37366	10	0.0185185	0.0925926	0.925926	0.925926	Chr7:30062251..30131906	SCRN1	Chr7:30066195..30149580	LOC223082	Chr7:30151938..30154697	DKFZp586I1420	Chr7:30155413..30168795	FKBP14
7	30202748	30212425	rs6956830	rs7793010	9678	9	0	0.111111	1.11111	1.11111	Chr7:30170817..30232881	FAPP2	Chr7:30206422..30260537	CARD4
7	42593065	42633849	rs684316	rs1346392	40785	13	0.0178571	0.0892857	0.910714	0.910714
7	42647573	42670139	rs607148	rs11984158	22567	5	0.0185185	0.277778	0.796296	0.796296
7	78872871	78893219	rs2961531	rs17152697	20349	14	0.037037	0.0925926	0.333333	0.388889
7	98976848	99028721	rs2687117	rs2023548	51874	11	0	0.0526316	1.05263	1.05263	Chr7:98961112..98987765	PILRA	Chr7:98966001..98993205	CYP3A4	Chr7:98988538..99016345	ZCWPW1	Chr7:99017297..99021784	FLJ20257	Chr7:99022955..99024137	MGC22793
7	107222232	107267426	rs1636942	rs2240445	45195	18	0	0.0555556	0.777778	0.814815	Chr7:107224527..107331331	LAMB4
7	109077790	109118382	rs1524467	rs2107169	40593	18	0.0344828	0.137931	1.03448	1.03448
7	118472678	118529996	rs1387263	rs308129	57319	28	0	0.280702	0	0.45614
7	119293455	119314834	rs10272387	rs7805422	21380	11	0.0169492	0.254237	0	0.59322	Chr7:118938853..119415495	KCND2
7	136721640	136743087	rs834449	rs2037678	21448	10	0.0185185	0.148148	1	1	Chr7:136490417..136947629	DGKI	Chr7:136740195..136782036	AKR1D1
7	138231938	138281858	rs10215341	rs6955929	49921	11	0	0.163636	0.363636	0.509091	Chr7:138232923..138288945	FLJ12571	Chr7:138235699..138478620	HIPK2
7	143632799	143654353	rs17169957	rs7794078	21555	9	0.0363636	0.142857	1.09091	1.07143	Chr7:143540784..143924874	TPK1
7	143784828	143789724	rs6464611	rs2189738	4897	2	0.037037	0.277778	1.09259	1.09259	Chr7:143540784..143924874	TPK1
7	143798059	143799494	rs6954373	rs13437960	1436	2	0.037037	0.259259	1.11111	1.11111	Chr7:143540784..143924874	TPK1
7	145328705	145363790	rs6960811	rs6949894	35086	16	0	0.0740741	0.925926	0.925926
7	145400308	145424555	rs10281206	rs6464752	24248	12	0	0.0892857	1	1
7	151512871	151531595	rs7796615	rs1972551	18725	4	0	0.210526	0.0350877	0.719298	Chr7:151225410..151524792	MLL3	Chr7:151525727..151531982	LOC220832
8	8753688	8763956	rs332030	rs11998339	10269	4	0.037037	0.12963	0.722222	0.740741	Chr8:8680942..8787978	MFHAS1
8	10587177	10593172	rs11994746	rs11995470	5996	3	0.0333333	0.25	0.716667	0.733333	Chr8:10567557..10595513	LOC203076
8	34747028	34834704	rs7015192	rs10093106	87677	35	0.0172414	0.0172414	1.03448	1.03448	Chr8:34789346..34789821	LOC389646
8	35614666	35652942	rs12543831	rs7812475	38277	22	0.0357143	0.125	0.428571	0.446429	Chr8:35459578..35709848	UNC5D
8	35656755	35685501	rs7824631	rs7836141	28747	18	0.0178571	0.196429	0.428571	0.482143	Chr8:35459578..35709848	UNC5D
8	35704013	35740402	rs6998605	rs1946744	36390	7	0.0357143	0.267857	0.410714	0.482143	Chr8:35459578..35709848	UNC5D
8	35795239	35913646	rs7820256	rs7839685	118408	18	0	0.12963	0.537037	0.592593
8	36687082	36697517	rs1981323	rs2186296	10436	5	0	0.237288	0.661017	0.694915
8	48713674	48734315	rs9918758	rs7839161	20642	3	0.0363636	0.218182	0.8	0.818182
8	48735847	48787184	rs10106803	rs10504062	51338	23	0	0.0555556	0.796296	0.796296	Chr8:48735629..48922703	PRKDC
8	56393077	56394251	rs7837352	rs11986797	1175	2	0	0.25	0.732143	0.767857	Chr8:56065010..56488669	KIAA1889
8	80991959	81008710	rs10957952	rs16907391	16752	7	0.0185185	0.185185	0.833333	0.851852	Chr8:80881057..80992468	MRPS28	Chr8:80997711..81133731	TPD52
8	82045554	82052343	rs7828228	rs6985240	6790	5	0.0333333	0.166667	1	1
8	91679418	91689569	rs10453062	rs9297885	10152	5	0.0363636	0.218182	1.05455	1.05455
8	111312305	111382931	rs7835877	rs10105742	70627	21	0.0185185	0.166667	0.685185	0.722222
8	111713766	111725883	rs7009298	rs7007326	12118	4	0.0175439	0.263158	1.05263	1.05263
8	126592819	126596092	rs7013672	rs2054069	3274	2	0.0178571	0.267857	0.696429	0.732143
8	145200642	145216458	rs7840556	rs11993268	15817	4	0.0333333	0.1	1	1	Chr8:145192588..145207996	MGC61633	Chr8:145208739..145212088	LOC392275	Chr8:145212208..145224818	OPLAH
9	485805	503222	rs7847380	rs10974932	17418	9	0	0.148148	1.07407	1.07407
9	1928082	1943536	rs7024058	rs3935922	15455	6	0.0185185	0.0925926	0.185185	0.351852
9	2899111	2905564	rs10511437	rs12340130	6454	4	0.0178571	0.25	0.928571	0.928571
9	3381364	3390530	rs7850206	rs7862591	9167	4	0.0166667	0.0666667	0.683333	0.716667	Chr9:3214645..3515983	RFX3
9	10048158	10048873	rs449194	rs373184	716	4	0.0178571	0.285714	0.535714	0.589286
9	13355907	13365758	rs7038373	rs12341870	9852	7	0.0185185	0.111111	0.87037	0.87037
9	14285934	14293061	rs7041006	rs2382468	7128	6	0.0172414	0.172414	0.551724	0.586207	Chr9:14077366..14303719	NFIB
9	15970676	15971144	rs12000455	rs1576171	469	2	0.0338983	0.288136	0.355932	0.491525
9	20341228	20359374	rs3780826	rs10964545	18147	12	0	0.148148	0.111111	0.259259	Chr9:20334968..20612450	MLLT3
9	71714473	71715840	rs7875635	rs2502788	1368	2	0.0357143	0.285714	1.07143	1.07143	Chr9:71715450..71721876	LOC138972
9	71833341	71844346	rs3858115	rs2061395	11006	7	0	0.267857	0.625	0.678571
9	94863645	94964718	rs2278647	rs7859940	101074	55	0.0172414	0.0689655	0.431034	0.5	Chr9:94862220..94869363	LOC286355	Chr9:94897985..94920180	ZNF510	Chr9:94959117..94996303	LOC158431
9	95029489	95109993	rs7851695	rs2486612	80505	8	0.0344828	0.172414	0.465517	0.62069	Chr9:95088165..95155700	HIATL2
9	120840430	120917461	rs917714	rs2535738	77032	27	0.0185185	0.0925926	0.888889	0.888889	Chr9:120862314..120863249	LOC254973	Chr9:120888064..120889107	LOC392390	Chr9:120900192..120900929	LOC389789
9	122657545	122670079	rs3814133	rs12339750	12535	6	0.0169492	0.254237	0.661017	0.677966	Chr9:122658451..122909621	NR6A1
9	122679543	122696249	rs6478669	rs12341407	16707	8	0	0.285714	0.607143	0.625	Chr9:122658451..122909621	NR6A1
9	129255133	129271327	rs7038827	rs353515	16195	8	0	0.20339	0.186441	0.474576	Chr9:129247974..129274576	C9orf58
9	135940989	135950005	rs11137254	rs9410050	9017	5	0	0.237288	1.01695	1.01695	Chr9:135824031..135949193	Eu-HMTase1
9	136180083	136182032	rs7023278	rs10122109	1950	2	0.0344828	0.275862	0.775862	0.810345	Chr9:135990855..136235245	CACNA1B
10	2295947	2305551	rs11251149	rs10794901	9605	4	0.0185185	0.277778	0.222222	0.333333	Chr10:2296513..2311268	LOC399708
10	15942240	15948143	rs7083054	rs7919133	5904	5	0	0.163636	1	1
10	21267154	21276283	rs951804	rs10508636	9130	7	0.0363636	0.181818	0.4	0.545455
10	22558459	22603908	rs12247178	rs7073046	45450	19	0.0350877	0.0701754	1.05263	1.05263	Chr10:22559926..22561847	LOC389943
10	22675824	22767634	rs11012978	rs7904006	91811	51	0	0.0363636	1.07273	1.07273	Chr10:22638405..22710545	SPAG6
10	31484330	31532808	rs1250312	rs3123688	48479	21	0.0169492	0.118644	0.644068	0.661017
10	31768307	31793721	rs220037	rs220059	25415	13	0	0.148148	0.759259	0.777778	Chr10:31612148..31820742	TCF8
10	31807522	31873834	rs220060	rs7896028	66313	19	0	0.185185	0.740741	0.759259	Chr10:31612148..31820742	TCF8
10	34370603	34385914	rs7903425	rs12772039	15312	9	0.0338983	0.20339	0.627119	0.694915
10	35977314	35985284	rs661752	rs11813430	7971	6	0	0.142857	0.553571	0.571429	Chr10:35984142..35990973	LOC389947
10	35987858	35997437	rs612766	rs2486508	9580	6	0	0.125	0.553571	0.553571	Chr10:35984142..35990973	LOC389947
10	97692114	97710419	rs12250473	rs941998	18306	8	0	0.178571	0.321429	0.553571	Chr10:97616042..97695913	BLNK
10	97739923	97749925	rs12268869	rs3789940	10003	7	0.037037	0.185185	0.333333	0.592593	Chr10:97728799..97762908	DNTT
10	108418630	108424380	rs7919051	rs12261452	5751	6	0.0166667	0.116667	1	1	Chr10:107998008..108588879	SORCS1
10	117326766	117340360	rs7086294	rs6585374	13595	9	0.0344828	0.189655	0.982759	0.982759	Chr10:116518097..117373090	KIAA0534
10	117862863	117880302	rs10885935	rs7090501	17440	8	0.0185185	0.218182	0.203704	0.254545	Chr10:117817834..117902056	LOC119548
10	119397489	119408311	rs4752138	rs2996223	10823	6	0	0.298246	0.175439	0.368421
10	119421433	119428361	rs1986420	rs10510040	6929	4	0	0.241379	0	0.465517
10	119455615	119463126	rs3824820	rs12253658	7512	5	0.0172414	0.155172	0	0.465517	Chr10:119429016..119470701	Rab11-FIP2
11	9678361	9680405	rs360053	rs360048	2045	4	0.0172414	0.189655	0.310345	0.465517	Chr11:9649962..9737678	SWAP70
11	19545251	19549168	rs11822188	rs965526	3918	5	0.0363636	0.163636	0.927273	0.927273
11	19612909	19627587	rs4757829	rs4757833	14679	8	0.0181818	0.181818	0.745455	0.745455
11	25533247	25544676	rs11828889	rs1443152	11430	3	0.0172414	0.224138	1.03448	1.03448
11	38278562	38369032	rs6484988	rs1435147	90471	45	0	0.107143	0.428571	0.446429
11	40069429	40070190	rs12279098	rs16934335	762	4	0.0172414	0.258621	0.637931	0.706897
11	61062052	61078970	rs2908206	rs3018736	16919	12	0.0185185	0.185185	0.425926	0.518519	Chr11:61058145..61123658	SYT7
11	72666249	72671649	rs1790070	rs2511241	5401	3	0	0.232143	0.821429	0.839286	Chr11:72655652..72673705	P2RY2
11	78016658	78067613	rs10899559	rs12274219	50956	19	0	0.0909091	0.436364	0.490909
11	83889077	83893297	rs1943527	rs1367532	4221	3	0.0338983	0.20339	1.01695	1.01695	Chr11:82896987..84360746	DLG2
11	109232073	109244898	rs3741340	rs11213177	12826	10	0.0175439	0.298246	0.824561	0.842105
11	113407008	113409692	rs7930014	rs11214805	2685	3	0.0175439	0.280702	0.736842	0.754386
11	124749338	124755524	rs7952082	rs10893374	6187	6	0	0.103448	0.775862	0.810345
12	2656118	2695033	rs2270371	rs4765984	38916	11	0.0357143	0.0892857	0.732143	0.732143	Chr12:2032725..2672289	CACNA1C	Chr12:2672858..2676047	LOC283439
12	11438760	11441228	rs2416788	rs3809115	2469	3	0	0.280702	0.736842	0.77193	Chr12:11396024..11439767	PRB1
12	11562388	11590026	rs1641630	rs4763704	27639	13	0.0357143	0.0535714	0.553571	0.553571
12	15131540	15138937	rs10772835	rs6488745	7398	4	0.0166667	0.233333	0.983333	0.983333
12	15632127	15655166	rs4353325	rs7969972	23040	10	0	0.192982	0.807018	0.807018	Chr12:15366754..15641602	PTPRO
12	15665571	15710147	rs1802658	rs4363660	44577	14	0	0.178571	0.589286	0.589286	Chr12:15664363..15833589	EPS8
12	22000204	22025173	rs4762866	rs9645737	24970	10	0	0.148148	0.851852	0.851852
12	49117161	49164730	rs4424740	rs12581494	47570	14	0.0363636	0.236364	0.0363636	0.2	Chr12:49080917..49160055	LOC113251
12	58768891	58795868	rs12311074	rs1472203	26978	11	0.0363636	0.181818	0.618182	0.618182
12	63541941	63555314	rs12828363	rs939875	13374	7	0.0181818	0.163636	1.05455	1.05455	Chr12:63504677..63558350	KIAA0984
12	78622848	78639262	rs12825416	rs2808359	16415	12	0	0.296296	0.0555556	0.277778
12	87076954	87097344	rs7134848	rs12580763	20391	8	0.0350877	0.298246	0.964912	0.964912	Chr12:87038569..87093928	FLJ90492
12	87523185	87539840	rs1703071	rs4073022	16656	8	0.0185185	0.181818	0.685185	0.690909
12	126116808	126144908	rs2348320	rs2015215	28101	5	0.0363636	0.181818	0.381818	0.454545
12	129799608	129811349	rs1195748	rs10734985	11742	7	0.037037	0.111111	1.03704	1.03704
13	20446211	20448179	rs7334903	rs4770238	1969	6	0.037037	0.272727	0.685185	0.709091
13	28876511	28888318	rs9315015	rs8001989	11808	5	0.0363636	0.254545	0.727273	0.727273
13	31987333	32006967	rs9563614	rs7334150	19635	14	0.037037	0.0925926	0.574074	0.611111
13	32095629	32096817	rs1925092	rs2182057	1189	4	0.0350877	0.245614	0.421053	0.45614
13	36676778	36752673	rs6563606	rs10507472	75896	48	0.0178571	0.0178571	1.03571	1.03571	Chr13:36722018..36735140	BM-002
13	46844858	46856568	rs4151607	rs10507564	11711	12	0.0185185	0.12963	1.05556	1.05556	Chr13:46675912..46854023	RB1
13	46868513	46883850	rs7326934	rs7332828	15338	10	0	0.275862	0.844828	0.896552	Chr13:46861100..46905317	CHC1L
13	46889148	46909471	rs9316389	rs7337391	20324	15	0.0357143	0.214286	0.875	0.928571	Chr13:46861100..46905317	CHC1L
13	46934556	46949420	rs7985825	rs3751380	14865	8	0.0344828	0.241379	0.844828	0.896552
13	57914078	57914829	rs7995868	rs10507633	752	4	0	0.290909	0.851852	0.836364
13	62088807	62107723	rs4421875	rs4884507	18917	7	0.0172414	0.206897	0.913793	0.931034
13	70049261	70060590	rs9542733	rs7983453	11330	7	0.0363636	0.290909	0.563636	0.6	Chr13:69810099..70239331	DACH
13	70072182	70101205	rs7998414	rs7327826	29024	13	0.0185185	0.296296	0.537037	0.574074	Chr13:69810099..70239331	DACH
13	77815092	77818784	rs11839375	rs7983312	3693	2	0.0185185	0.240741	1.07407	1.07407
13	101745482	101758666	rs7329960	rs1330768	13185	5	0.0181818	0.290909	0.781818	0.781818
13	102547746	102617635	rs9586410	rs7987015	69890	31	0	0.0185185	0.833333	0.833333
13	105160832	105178711	rs10508180	rs12859004	17880	11	0.0357143	0.178571	0.946429	0.946429
14	27271090	27298417	rs10147557	rs10483343	27328	6	0.0338983	0.118644	1	1
14	30140092	30145745	rs8008514	rs6571449	5654	2	0.0169492	0.271186	1.01695	1.01695	Chr14:30020717..30319547	C14orf127
14	32690587	32696093	rs1244353	rs1888098	5507	4	0.037037	0.203704	0.351852	0.518519
14	43346086	43441057	rs11851218	rs11845088	94972	31	0.0185185	0.145455	0.833333	0.818182	Chr14:43346675..43346982	LOC401771	Chr14:43347843..43356640	LOC401772	Chr14:43356287..43365044	C14orf28	Chr14:43402959..43405176	BTBD5	Chr14:43421449..43533671	KIAA0423
14	52425477	52431021	rs6420881	rs942316	5545	4	0	0.142857	0.339286	0.535714
14	53648300	53660196	rs3759666	rs10133915	11897	5	0.0169492	0.237288	0.559322	0.627119	Chr14:53604889..53648437	DLG7
14	55819946	55838967	rs4901771	rs2152359	19022	9	0	0.296296	0.962963	0.962963
14	55840447	55843003	rs7154262	rs8012255	2557	4	0.0175439	0.157895	0.894737	0.894737
14	60169991	60174223	rs2181600	rs10138032	4233	4	0	0.277778	0.685185	0.722222	Chr14:60152280..60205017	HIF1A
14	65863169	65872075	rs9323497	rs7156809	8907	6	0.037037	0.203704	0.185185	0.407407	Chr14:65843741..65868869	PLEK2
14	77453884	77469745	rs2370893	rs2938027	15862	9	0.0338983	0.254237	0.881356	0.881356	Chr14:76860134..78320803	NRXN3
14	88417132	88446415	rs8015271	rs8009940	29284	11	0.0185185	0.185185	0.981481	0.981481	Chr14:88412336..88499726	TDP1
14	88473755	88493393	rs7141024	rs7154741	19639	7	0.0185185	0.259259	0.833333	0.833333	Chr14:88412336..88499726	TDP1
14	103906064	103927344	rs10147179	rs10135326	21281	13	0	0.109091	1.07273	1.07273	Chr14:103858042..103908735	MTA1	Chr14:103912807..103918176	CRIP2	Chr14:103925225..103926802	CRIP1
14	103981917	104025085	rs7493501	rs11628783	43169	6	0	0.12963	0.481481	0.555556	Chr14:103984616..103987801	LOC390510	Chr14:104024902..104033767	LOC388025
15	19375684	19838258	rs2665003	rs2077885	462575	11	0.0185185	0.0185185	0.296296	0.314815	Chr15:19489082..19494419	LOC400309	Chr15:19518858..19521402	LOC283804	Chr15:19538937..19547703	LOC388072	Chr15:19594799..19596443	LOC388073	Chr15:19626456..19630710	LOC388074	Chr15:19632019..19633744	LOC400313	Chr15:19768723..19789929	LOC400314
15	22996975	23008968	rs2739779	rs2719927	11994	8	0.0172414	0.206897	0.965517	0.965517	Chr15:22616155..23211970	SNRPN	Chr15:23004200..23004537	PAR4
15	23025594	23068268	rs2714757	rs2714786	42675	18	0	0.157895	0.982456	0.982456	Chr15:22616155..23211970	SNRPN
15	35990561	36003232	rs10163042	rs7168756	12672	6	0.0357143	0.285714	0.767857	0.785714
15	43100234	43109795	rs2002813	rs269867	9562	7	0	0.172414	0.913793	0.913793	Chr15:43100908..43122415	DUOX2
15	43113622	43137718	rs269863	rs3784576	24097	14	0	0.142857	0.232143	0.303571	Chr15:43100908..43122415	DUOX2	Chr15:43125628..43138131	FLJ32334
15	45866757	45884804	rs785020	rs572132	18048	10	0.0175439	0.157895	0.421053	0.491228
15	45891872	45922324	rs556222	rs509141	30453	18	0	0.185185	0.388889	0.407407
15	46081373	46155554	rs2470110	rs2433359	74182	42	0	0.0185185	0	0.12963	Chr15:46117180..46145455	NCKX5	Chr15:46148483..46186552	MYEF2
15	46160804	46237972	rs2459394	rs3784614	77169	32	0	0.0169492	0	0.186441	Chr15:46148483..46186552	MYEF2	Chr15:46191914..46212007	LOC400369	Chr15:46215954..46311181	SLC12A1
15	66814677	66847490	rs3743090	rs11631742	32814	21	0.0357143	0.196429	0.482143	0.482143	Chr15:66788023..66829041	ANP32A	Chr15:66811978..66815258	FLJ11722	Chr15:66841963..66842906	LOC390600
15	66848864	66887073	rs717330	rs7177264	38210	18	0.0338983	0.0847458	0.491525	0.491525
15	69761770	69773051	rs8024664	rs2277542	11282	8	0	0.0701754	0.561404	0.561404	Chr15:69711986..69786783	FLJ13710
15	70354710	70385889	rs1800431	rs4777507	31180	17	0.0363636	0.272727	0.509091	0.545455	Chr15:70351597..70384157	HEXA	Chr15:70384525..70386086	FLJ13315
15	86730265	86764076	rs8036142	rs744206	33812	15	0.0169492	0.152542	0.966102	0.966102	Chr15:86732478..86740387	MRPL46	Chr15:86740452..86751263	MRPS11
15	88211016	88240446	rs7403051	rs8034431	29431	8	0.0172414	0.0689655	0.672414	0.706897
15	99133102	99150052	rs7180535	rs8034686	16951	9	0	0.0701754	0.631579	0.666667	Chr15:99125300..99139765	LOC145757
16	5394707	5407129	rs8047630	rs4786678	12423	9	0	0.0727273	1.07273	1.07273
16	10870076	10888963	rs4780998	rs9923439	18888	7	0	0.222222	0.351852	0.37037	Chr16:10830561..10905564	LOC283816
16	19088915	19109054	rs7188249	rs11860401	20140	9	0.0357143	0.125	0.785714	0.785714	Chr16:19092337..19094346	LOC162073
16	22357809	22400113	rs12444131	rs8048459	42305	10	0.037037	0.259259	0.592593	0.62963	Chr16:22397419..22415589	LOC390684
16	67179215	67195262	rs6499126	rs8059226	16048	8	0.0363636	0.236364	0.927273	0.927273	Chr16:67136982..67195341	FLJ11004
16	78211665	78235005	rs7199086	rs6564548	23341	13	0	0.0545455	0.381818	0.4	Chr16:77913078..79026091	WWOX
16	78713158	78718283	rs2062896	rs8062305	5126	7	0.0178571	0.178571	0.607143	0.678571	Chr16:77913078..79026091	WWOX	Chr16:78638702..78770946	LOC401862
16	81784873	81808926	rs6564945	rs13333118	24054	6	0.0181818	0.145455	1.05455	1.05455
16	81827919	81829295	rs8063275	rs4536470	1377	2	0.0333333	0.133333	0.966667	0.966667
16	81834324	81840884	rs6564960	rs16956242	6561	4	0.0338983	0.254237	0.966102	0.966102
16	85821964	85831307	rs7202854	rs8062449	9344	4	0.0363636	0.127273	0.0727273	0.290909
16	87226752	87236374	rs3748399	rs8043551	9623	3	0.0181818	0.218182	0.763636	0.8	Chr16:87221345..87306947	BDG29
17	11181786	11227625	rs8075504	rs8075550	45840	23	0	0.0740741	0.240741	0.259259
17	11344059	11365226	rs6503362	rs1122642	21168	13	0.0181818	0.0909091	0.509091	0.563636	Chr17:11345306..11662762	LOC388336
17	29417948	29425600	rs2089464	rs8076569	7653	7	0	0.271186	1.01695	1.01695	Chr17:29394496..29431774	CENTA2
17	29481652	29542607	rs9900011	rs7223044	60956	15	0	0.277778	0.648148	0.666667	Chr17:29494491..29508235	LOC400590
17	35510778	35517766	rs7218038	rs9913149	6989	5	0.037037	0.148148	1.11111	1.11111	Chr17:35501797..35609721	AATF
17	58722438	58789640	rs345163	rs8073310	67203	14	0.0185185	0.0740741	0.925926	0.925926	Chr17:58730876..58943893	USP32
17	58805668	58830050	rs237967	rs8079797	24383	10	0.037037	0.185185	0.944444	0.944444	Chr17:58730876..58943893	USP32
17	58847418	58941372	rs8077222	rs12600894	93955	18	0	0.0740741	0.87037	0.87037	Chr17:58730876..58943893	USP32
17	58951860	58980020	rs9908510	rs1355250	28161	7	0	0.185185	0.944444	0.944444	Chr17:58974294..58983184	LOC124773
17	58988661	58995460	rs7207456	rs6503971	6800	6	0	0.20339	1.01695	1.01695	Chr17:58994941..59078001	APPBP2
17	58996459	59053664	rs9898327	rs8082431	57206	21	0	0.220339	1.01695	1.01695	Chr17:58994941..59078001	APPBP2
17	59067586	59113172	rs7214631	rs1197064	45587	12	0	0.290909	1.07407	1.05455	Chr17:58994941..59078001	APPBP2
17	59114480	59135984	rs903483	rs8182342	21505	7	0.0185185	0.218182	0.685185	0.709091	Chr17:59116328..59138402	LOC388406
17	59143462	59298988	rs7216300	rs7501675	155527	32	0	0.1	0.7	0.716667	Chr17:59151975..59216457	PPM1D	Chr17:59229654..59944613	BCAS3
17	72811986	72824252	rs11658026	rs7212893	12267	10	0	0.140351	1.05263	1.05263	Chr17:72806840..72855278	TTYH2
18	4371992	4379879	rs617841	rs556831	7888	4	0.0185185	0.277778	1.11111	1.11111	Chr18:3976417..4445913	LOC388458
18	5387323	5402573	rs8096452	rs9944917	15251	10	0	0.127273	0.836364	0.836364	Chr18:5382388..5533986	EPB41L3
18	7745488	7750682	rs606142	rs1374105	5195	6	0	0.109091	0.727273	0.727273	Chr18:7557817..8396854	PTPRM
18	8292512	8309751	rs10163974	rs637561	17240	10	0.0357143	0.160714	0.607143	0.607143	Chr18:7557817..8396854	PTPRM
18	18010651	18028770	rs9951435	rs9630787	18120	6	0.0169492	0.186441	0.932203	0.932203	Chr18:18001403..18034214	GATA6
18	23874281	23877017	rs474904	rs17446036	2737	9	0	0.296296	0	0.962963	Chr18:23782922..24009178	CDH2
18	28654120	28750865	rs7228215	rs9961243	96746	61	0.0169492	0.0677966	0.966102	0.966102
18	43509740	43515197	rs2653625	rs7231301	5458	4	0.0357143	0.232143	0.875	0.875
18	44692476	44697613	rs9945724	rs9944966	5138	4	0.037037	0.222222	0.740741	0.740741
18	64793899	64911514	rs593385	rs8093305	117616	88	0.0363636	0.0545455	0.272727	0.272727	Chr18:64653564..64871395	FLJ23594
18	65732400	65748485	rs3931957	rs3937015	16086	8	0.0178571	0.232143	1.07143	1.07143	Chr18:65679161..65773129	CD226
18	65752949	65774139	rs3934439	rs285217	21191	12	0.0178571	0.160714	1.07143	1.07143	Chr18:65679161..65773129	CD226
18	71563279	71570659	rs2584280	rs8095315	7381	7	0.037037	0.0925926	1.07407	1.07407
18	71574502	71609129	rs6420505	rs8086908	34628	19	0.0185185	0.0740741	1.03704	1.03704
19	1411998	1426391	rs7256954	rs166451	14394	6	0.0185185	0.0555556	1.09259	1.09259	Chr19:1402288..1424237	APCL	Chr19:1424203..1430193	FLJ36666
19	7103703	7110915	rs3745548	rs8100109	7213	4	0.0350877	0.175439	0.157895	0.333333	Chr19:7067638..7245011	INSR
19	20959655	20970082	rs8103157	rs10418706	10428	6	0.0357143	0.263158	0.696429	0.701754
19	22527304	22557604	rs8109169	rs6511363	30301	11	0.037037	0.236364	0.685185	0.690909
19	56475227	56485971	rs1875423	rs8112146	10745	6	0.0350877	0.175439	0.614035	0.631579	Chr19:56466613..56477855	LOC339351
20	54435753	54450272	rs2426550	rs6069141	14520	8	0	0.254237	0.983051	1
21	15934272	15947427	rs2242860	rs2242864	13156	6	0	0.298246	0.964912	0.964912
21	16488945	16495277	rs6517692	rs6517694	6333	5	0	0.152542	0.694915	0.728814	Chr21:16488570..16901360	LOC388815
21	16516169	16540390	rs171192	rs238993	24222	13	0	0.137931	0.741379	0.758621	Chr21:16488570..16901360	LOC388815
21	16751235	16850425	rs8129337	rs2823880	99191	53	0	0.0508475	0.915254	0.915254	Chr21:16488570..16901360	LOC388815
21	16855653	16887986	rs2000625	rs2823899	32334	22	0	0.12963	0.851852	0.851852	Chr21:16488570..16901360	LOC388815
21	16899740	16914910	rs2823906	rs2211981	15171	7	0.0338983	0.118644	0.745763	0.745763	Chr21:16488570..16901360	LOC388815
21	20131668	20132693	rs8130561	rs2825860	1026	3	0.037037	0.240741	0.203704	0.388889
21	23146729	23169062	rs8131882	rs7277403	22334	13	0	0.0847458	0.694915	0.745763
21	31453014	31470943	rs2833313	rs8132799	17930	13	0.0178571	0.0535714	0.482143	0.517857	Chr21:31412928..31851737	TIAM1
21	38476206	38497002	rs2836181	rs7280117	20797	5	0.0172414	0.224138	0.810345	0.810345
22	26421517	26426168	rs5762319	rs5762324	4652	3	0.0178571	0.214286	0.375	0.428571
22	45795752	45807039	rs6008067	rs9626699	11288	5	0	0.107143	1.03571	1.03571
22	48083185	48085160	rs1033372	rs6009713	1976	3	0	0.178571	0.142857	0.5	Chr22:48027509..48091660	LOC400933

## Sheet: CEUvsEAS
Chr	First_pos	Last_pos	First_rs	Last_rs	Length	SNP	rMHH(YRI/CEU)	rHH(YRI/CEU)	rMHH(EAS/CEU)	rHH(EAS/CEU)	Genes
4	136167312	136180801	rs13348255	rs10023627	13490	3	0.631579	0.649123	0.0175439	0.105263
5	33991644	34012646	rs35406	rs35412	21003	17	0.0338983	0.118644	0	0.220339	Chr5:33990229..34030250	MATP
9	20366952	20412630	rs3780829	rs12554291	45679	17	0.0892857	0.160714	0.0178571	0.267857	Chr9:20334968..20612450	MLLT3
10	119465805	119472313	rs1990325	rs9633728	6509	3	0.0689655	0.293103	0	0.172414	Chr10:119429016..119470701	Rab11-FIP2	Chr10:119471092..119631919	CASC2
10	119475465	119489526	rs2928112	rs7081714	14062	8	0.0701754	0.122807	0	0.280702	Chr10:119471092..119631919	CASC2
11	15949591	15950066	rs730992	rs7950566	476	4	0	0.327273	0	0.290909
12	49058834	49110033	rs10431531	rs11169423	51200	10	0.0181818	0.345455	0.0363636	0.290909	Chr12:49007359..49076672	LOC121006	Chr12:49080917..49160055	LOC113251
12	49117161	49164730	rs4424740	rs12581494	47570	14	0.0363636	0.236364	0.0363636	0.2	Chr12:49080917..49160055	LOC113251
12	111113679	111119351	rs7310858	rs11066226	5673	3	0.661017	0.661017	0.0169492	0.237288	Chr12:111099314..111123510	FLJ34154
15	46020124	46036844	rs8031139	rs4775731	16721	9	0.0545455	0.2	0.0181818	0.163636
15	46081373	46155554	rs2470110	rs2433359	74182	42	0	0.0185185	0	0.12963	Chr15:46117180..46145455	NCKX5	Chr15:46148483..46186552	MYEF2
15	46160804	46237972	rs2459394	rs3784614	77169	32	0	0.0169492	0	0.186441	Chr15:46148483..46186552	MYEF2	Chr15:46191914..46212007	LOC400369	Chr15:46215954..46311181	SLC12A1
